# Supplementary material for: Complete Mitochondrial Genomes of Metcalfa pruinosa and Salurnis marginella (Hemiptera: Flatidae): Genomic Comparison and Phylogenetic Inference in Fulgoroidea
Source: MDPI journal article supplement (doi:10.3390/cimb43030099), 2021-09-30
Supplement: s1 [file s1]

**Table S5**  
Size of mitochondrial tRNAs available in Fulgoroidea.

| Taxon                                          | <i>trnI</i> | <i>trnQ</i> | <i>trnM</i> | <i>trnW</i> | <i>trnC</i> | <i>trnY</i> | <i>trnL<sub>2</sub></i> | <i>trnK</i> | <i>trnD</i> | <i>trnG</i> | <i>trnA</i> | <i>trnR</i> | <i>trnN</i> | <i>trnS<sub>I</sub></i> | <i>trnE</i> | <i>trnF</i> | <i>trnH</i> | <i>trnT</i> | <i>trnP</i> | <i>trnS<sub>2</sub></i> | <i>trnL<sub>1</sub></i> | <i>trnV</i> | Average | References          |  |
|------------------------------------------------|-------------|-------------|-------------|-------------|-------------|-------------|-------------------------|-------------|-------------|-------------|-------------|-------------|-------------|-------------------------|-------------|-------------|-------------|-------------|-------------|-------------------------|-------------------------|-------------|---------|---------------------|--|
| Fulgoroidea                                    |             |             |             |             |             |             |                         |             |             |             |             |             |             |                         |             |             |             |             |             |                         |                         |             |         |                     |  |
| Flatidae                                       |             |             |             |             |             |             |                         |             |             |             |             |             |             |                         |             |             |             |             |             |                         |                         |             |         |                     |  |
| Flatinae                                       |             |             |             |             |             |             |                         |             |             |             |             |             |             |                         |             |             |             |             |             |                         |                         |             |         |                     |  |
| <i>Metcalfa pruinosa</i> (H1)                  | 65          | 69          | 66          | 68          | 64          | 64          | 63                      | 70          | 67          | 65          | 68          | 64          | 65          | 61                      | 65          | 65          | 65          | 64          | 66          | 63                      | 65                      | 73          | 65.68   | This study          |  |
| <i>Metcalfa pruinosa</i> (H3)                  | 65          | 69          | 66          | 68          | 64          | 64          | 63                      | 70          | 67          | 65          | 68          | 64          | 65          | 61                      | 65          | 65          | 65          | 64          | 66          | 63                      | 65                      | 73          | 65.68   | This study          |  |
| <i>Salurnis marginella</i>                     | 62          | 69          | 66          | 65          | 60          | 61          | 62                      | 69          | 63          | 61          | 63          | 61          | 63          | 59                      | 62          | 63          | 62          | 61          | 63          | 61                      | 62                      | 70          | 63.09   | This study          |  |
| Fulgoridae                                     |             |             |             |             |             |             |                         |             |             |             |             |             |             |                         |             |             |             |             |             |                         |                         |             |         |                     |  |
| Fulgorinae                                     |             |             |             |             |             |             |                         |             |             |             |             |             |             |                         |             |             |             |             |             |                         |                         |             |         |                     |  |
| <i>Aphaena (Callidepsa) amabilis</i>           | 63          | 69          | 64          | 62          | 63          | 62          | 69                      | 70          | 63          | 65          | 65          | 61          | 62          | 58                      | 66          | 63          | 62          | 65          | 62          | 63                      | 62                      | 64          | 63.77   | Wang et al. (2019)  |  |
| <i>Aphaena (Aphaena) discolor nigrotibiata</i> | 64          | 69          | 63          | 62          | 60          | 62          | 68                      | 70          | 68          | 63          | 65          | 61          | 62          | 60                      | 62          | 63          | 62          | 65          | 63          | 62                      | 62                      | 61          | 63.50   | Wang et al. (2019)  |  |
| Achilidae                                      |             |             |             |             |             |             |                         |             |             |             |             |             |             |                         |             |             |             |             |             |                         |                         |             |         |                     |  |
| Achilinae                                      |             |             |             |             |             |             |                         |             |             |             |             |             |             |                         |             |             |             |             |             |                         |                         |             |         |                     |  |
| <i>Betatropis formosana</i>                    | 64          | 69          | 63          | 64          | 63          | 62          | 64                      | 68          | 62          | 61          | 66          | 62          | 62          | 60                      | 64          | 63          | 63          | 63          | 62          | 66                      | 63                      | 63          | 63.50   | Xu et al. (2019)    |  |
| <i>Magadhaideus luodiana</i> sp. nov           | 65          | 69          | 66          | 71          | 67          | 63          | 62                      | 69          | 62          | 62          | 65          | 59          | 64          | 55                      | 63          | 63          | 62          | 62          | 63          | 64                      | 66                      | 64          | 63.91   | Xu et al. (2019)    |  |
| <i>Peltatavertexalis horizontalis</i> sp. nov  | 64          | 69          | 65          | 63          | 64          | 62          | 62                      | 70          | 63          | 65          | 63          | 60          | 63          | 56                      | 64          | 67          | 62          | 64          | 63          | 64                      | 63                      | 64          | 63.64   | Xu et al. (2019)    |  |
| <i>Plectoderini</i> sp.                        | 64          | 69          | 67          | 67          | 63          | 62          | 63                      | 69          | 72          | 64          | 68          | 61          | 64          | 60                      | 63          | 64          | 62          | 62          | 63          | 63                      | 64                      | 63          | 64.41   | Xu et al. (2019)    |  |
| <i>Paracatonidia</i> sp.                       | 64          | 69          | 64          | 65          | 61          | 62          | 66                      | 70          | 62          | 61          | 65          | 62          | 63          | 63                      | 62          | 67          | 63          | 63          | 65          | 64                      | 66                      | 65          | 64.18   | Xu et al. (2019)    |  |
| Issidae                                        |             |             |             |             |             |             |                         |             |             |             |             |             |             |                         |             |             |             |             |             |                         |                         |             |         |                     |  |
| Issinae                                        |             |             |             |             |             |             |                         |             |             |             |             |             |             |                         |             |             |             |             |             |                         |                         |             |         |                     |  |
| <i>Sivaloka damnosus</i>                       | 66          | 69          | 66          | 64          | 63          | 67          | 63                      | 70          | 62          | 61          | 67          | 66          | 66          | 59                      | 62          | 65          | 61          | 63          | 63          | 65                      | 63                      | 73          | 64.73   | Song et al. (2010)  |  |
| Delphacidae                                    |             |             |             |             |             |             |                         |             |             |             |             |             |             |                         |             |             |             |             |             |                         |                         |             |         |                     |  |
| Asiracinae                                     |             |             |             |             |             |             |                         |             |             |             |             |             |             |                         |             |             |             |             |             |                         |                         |             |         |                     |  |
| <i>Ugyops</i> sp.                              | 64          | 67          | 64          | 63          | 61          | 61          | 63                      | 72          | 62          | 60          | 61          | 60          | 64          | 61                      | 66          | 62          | 64          | 63          | 64          | 62                      | 62                      | 69          | 63.41   | Yu and Liang (2018) |  |
| Delphacinae                                    |             |             |             |             |             |             |                         |             |             |             |             |             |             |                         |             |             |             |             |             |                         |                         |             |         |                     |  |
| <i>Sogatella furcifera</i> (Hainan, China)     | 66          | 66          | 62          | 67          | 65          | 63          | 65                      | 71          | 60          | 62          | 61          | 61          | 63          | 54                      | 63          | 68          | 60          | 63          | 62          | 56                      | 62                      | 69          | 63.14   | Zhang et al. (2014) |  |
| <i>Sogatella furcifera</i> (Yunnan, China)     | 66          | 66          | 62          | 67          | 65          | 63          | 65                      | 71          | 60          | 62          | 61          | 61          | 63          | 54                      | 63          | 68          | 60          | 62          | 62          | 56                      | 62                      | 69          | 63.09   | Zhang et al. (2014) |  |
| Range                                          | 62-66       | 66-69       | 62-67       | 62-71       | 60-67       | 61-67       | 62-69                   | 68-72       | 60-72       | 60-65       | 61-68       | 59-66       | 62-66       | 54-63                   | 62-66       | 62-68       | 60-65       | 61-65       | 62-66       | 56-66                   | 62-66                   | 61-73       |         |                     |  |
