# Supplementary material for: Complete Mitochondrial Genomes of Metcalfa pruinosa and Salurnis marginella (Hemiptera: Flatidae): Genomic Comparison and Phylogenetic Inference in Fulgoroidea
Source: MDPI journal article supplement (doi:10.3390/cimb43030099), 2021-09-30
Supplement: s1 [file s1]

Table S2

Primers used to amplify and sequence the mitochondrial genome of *Salurnis marginella*.

| Fragment name   | Primer name | Direction <sup>a</sup> | Sequence (5'-3')          | Nucleotide position <sup>b</sup> | Mismatch <sup>c</sup> |
|-----------------|-------------|------------------------|---------------------------|----------------------------------|-----------------------|
| Long fragments  |             |                        |                           |                                  |                       |
| LF1             | LF1_F1      | F                      | AGGATCAATAATCAAAAATGACC   | 1487-1509                        | 0                     |
| "               | LF1_R1      | R                      | TGACGAAAAGAATATGATTCTG    | 4833-4855                        | 0                     |
| LF2             | LF2_F1      | F                      | ATATAGTTACAAGAAGCCCATG    | 4593-4614                        | 1                     |
| "               | LF2_R2      | R                      | TTCTCTGTTGTCTATATAGC      | 8389-8409                        | 0                     |
| LF3             | LF3_F1      | F                      | AAAMCCMAWCTGTCTYAAAGTAG   | 6927-6947                        | 5                     |
| "               | LF3_R2      | R                      | TGGCGGTTTTTAAATCTTTTCAG   | 13892-13914                      | 0                     |
| LF4             | LF4_F2      | F                      | WAARATCTATAGGGTCTTATCG    | 12679-12700                      | 2                     |
| "               | LF4_R1      | R                      | TATGATAGATCTAATACCTGC     | 1812-1832                        | 0                     |
| Short fragments |             |                        |                           |                                  |                       |
| SF1             | SF1_F2      | F                      | ATCATTACTTATTGCGAGATC     | 1682-1702                        | 0                     |
| "               | SF1_R2      | R                      | TTTAAATWCCWGTRGGTACTGC    | 2293-2313                        | 3                     |
| SF2             | SF2_F2      | F                      | TGAGCYCATCAYATATTTACTG    | 2217-2238                        | 4                     |
| "               | SF2_R2      | R                      | AARTYYWTTGCACTWWTCTGCC    | 2907-2928                        | 6                     |
| SF3             | SF3_F3      | F                      | ACCYCGWCGATAYTCAG         | 2663-2679                        | 3                     |
| "               | SF3_R2      | R                      | AGMKGATGTAAAYAAKWATTCG    | 3401-3421                        | 6                     |
| SF4             | SF4_F_MJ    | F                      | TTGGTCACCAATGATACTGATC    | 3259-3279                        | 0                     |
| "               | SF4_R_MJ    | R                      | TTTATTGGTAGGATGATTGC      | 3997-4016                        | 0                     |
| SF5             | SF5_F2      | F                      | CAAAYATCRCCMATTATRTGAAC   | 3779-3801                        | 4                     |
| "               | SF5_R2      | R                      | AGTAGCAAAAACATATGCTTG     | 4519-4539                        | 0                     |
| SF6             | SF6_F2      | F                      | ATAATTGCAGGACACTTACTG     | 4399-4419                        | 0                     |
| "               | SF6_R1      | R                      | TGTTSWTCCATAAAATTGAGTC    | 5135-5155                        | 4                     |
| SF7             | SF7_F2      | F                      | AGGAGTTTCAATTACCTGAGC     | 4987-5007                        | 0                     |
| "               | SF7_R2      | R                      | WGAATATGGTTTCGWGCTG       | 5578-5597                        | 4                     |
| SF8             | SF8_F2      | F                      | TTTAYATYWSARTTTACTGATG    | 5322-5343                        | 6                     |
| "               | SF8_R1      | R                      | AWWYCAWTTTTTTCATTAACAGTG  | 5938-5961                        | 5                     |
| SF9             | SF9_F1      | F                      | TTAAWAATAACAKYTTYATTGC    | 5796-5817                        | 4                     |
| "               | SF9_R1      | R                      | TWCTGGKTTTTWTTAWRTCG      | 6343-6363                        | 6                     |
| SF10            | SF10_F1     | F                      | ARTRTYAAACTTTTAWAATTAAGC  | 6126-6147                        | 7                     |
| "               | SF10_R2     | R                      | TTTTTTGGTAATCARGATATTCG   | 6871-6894                        | 1                     |
| SF11            | SF11_F2     | F                      | TATTTCTAAAACAAAATCCYTAG   | 6747-6769                        | 5                     |
| "               | SF11_R2     | R                      | TTTATRAATCGTTTGGTGATG     | 7394-7415                        | 3                     |
| SF12            | SF12_F2     | F                      | AGTGGGAGCTGCTATAGC        | 7212-7229                        | 3                     |
| "               | SF12_R2     | R                      | TTWTKTTTTTTCATTTATWTCCTG  | 7943-7966                        | 5                     |
| SF13            | SF13_F2     | F                      | ATAAAAATAWTAWAGAAAYCARTC  | 7660-7682                        | 5                     |
| "               | SF13_R2     | R                      | AATTATATTTATATTGGGACATGG  | 8314-8337                        | 0                     |
| SF14            | SF14_F2     | F                      | AAAAAYAAATTAATAGAAGGAGGAC | 8144-8167                        | 2                     |
| "               | SF14_R2     | R                      | ATACCCTTTTTGCCTC          | 8779-8794                        | 0                     |
| SF15            | SF15_F1     | F                      | TCCTAATTTTAATAAGACTCCAGC  | 8556-8579                        | 0                     |
| "               | SF15_R2     | R                      | ATTTCTTATRTTTTTGGWSTAG    | 9065-9086                        | 3                     |
| SF16            | SF16_F2     | F                      | CCGAAAATAATTAACACACAGG    | 8845-8867                        | 0                     |
| "               | SF16_R1     | R                      | TTTAYTWAGWTRRTTTTAGTTCG   | 9439-9463                        | 6                     |
| SF17            | SF17_F2     | F                      | AGAWAKTARRWAATGMTTACG     | 9421-9441                        | 7                     |
| "               | SF17_R2     | R                      | TSWWYTTGAAATATTTGTWACTG   | 10066-10088                      | 5                     |
| SF18            | SF18_F2     | F                      | TTYATATAYATRTCAAGARTSG    | 9807-9828                        | 6                     |
| "               | SF18_R1     | R                      | TTATTACRAARAATATTGAKGC    | 10363-10384                      | 3                     |
| SF19            | SF19_F1     | F                      | TAATAATTCAAATYATWWCAGG    | 10226-10247                      | 4                     |
| "               | SF19_R2     | R                      | TTWGCTGGTGTAARTTTTCTGG    | 10862-10883                      | 4                     |
| SF20            | SF20_F1     | F                      | TWGATAACCCAACACTRAACCG    | 10613-10634                      | 4                     |
| "               | SF20_R2     | R                      | TKTCTTGAARGTGTTATTTACC    | 11368-11389                      | 3                     |
| SF21            | SF21_F2     | F                      | AAGAACCWTAYATYTAAACAGG    | 11135-11156                      | 3                     |
| "               | SF21_R2     | R                      | TTTTTTTCTGTGTGTYTKGCTG    | 11657-11678                      | 3                     |
| SF22            | SF22_F2     | F                      | TTRAAMCCYGAACTAATTCAG     | 11596-11617                      | 4                     |
| "               | SF22_R2     | R                      | WGCTTTTTTACTTTATTTGAGCG   | 12157-12180                      | 2                     |
| SF23            | SF23_F1     | F                      | YAGAATTTGAAGATCAWCCAG     | 11855-11875                      | 6                     |
| "               | SF23_R2     | R                      | ATACCTTAGGGATAACAGC       | 12509-12527                      | 0                     |
| SF24            | SF24_F2     | F                      | YACGCCGGTCTGAACCTCAG      | 12368-12386                      | 1                     |
| "               | SF24_R1     | R                      | GGCAAAATTTTKWTTTTCRCCT    | 12914-12934                      | 6                     |
| SF25            | SF25_F1     | F                      | AAAARACTAATTATATGCTACC    | 12803-12825                      | 1                     |
| "               | SF25_R2     | R                      | TTTACAATAAAATCTGTGTTCTCG  | 13513-13536                      | 0                     |
| SF26            | SF26_F2     | F                      | TAACCAGATAWMAAATTAACKCG   | 13207-13228                      | 5                     |
| "               | SF26_R2     | R                      | AATTTCTGTATATCTCTGTCG     | 13824-13846                      | 0                     |
| SF27            | SF27_F2     | F                      | TCTCACTGTATGAGAATGAC      | 13613-13631                      | 0                     |
| "               | SF27_R2     | R                      | AAAAATTTGTGCCAGCATTCG     | 14111-14132                      | 1                     |
| SF28            | SF28_F1     | F                      | TAAACAGGGTATCTAATCCTGG    | 13969-13989                      | 0                     |
| "               | SF28_R1     | R                      | YCGGGGTATGAACCCRTTAGC     | 170-190                          | 3                     |
| SF29            | SF29_F2     | F                      | AAAAGAAATCAAAATCTTCATGC   | 108-131                          | 2                     |
| "               | SF29_R1     | R                      | TRTTATTGGGGGTATTCCCTC     | 924-943                          | 5                     |
| SF30            | SF30_F1     | F                      | RTCMATTTMWAAAYAYRCCATG    | 724-744                          | 9                     |
| "               | SF30_R2     | R                      | ATTATTCCTACTATTCCCAGTC    | 1429-1450                        | 0                     |

<sup>a</sup>F and R, forward and reverse direction of transcription.<sup>b</sup>Nucleotide positions are with respect to the *S. marginella* mitochondrial genome.<sup>c</sup>Mismatches are with respect to the *S. marginella* mitochondrial genome.
