# Supplementary material for: Complete Mitochondrial Genomes of Metcalfa pruinosa and Salurnis marginella (Hemiptera: Flatidae): Genomic Comparison and Phylogenetic Inference in Fulgoroidea
Source: MDPI journal article supplement (doi:10.3390/cimb43030099), 2021-09-30
Supplement: s1 [file s1]

**Table S3**  
Summary of mitochondrial genomes of Fulgoroidea.

| Gene                    | Strand | Anticodon | Start codon                                                                                 | Stop codon                                                             | <i>Metcalfa pruinosa</i> (H1)      | <i>Metcalfa pruinosa</i> (H3)      | <i>Salurnis marginella</i>         | <i>Geisha distinctissima</i> <sup>‡</sup> | <i>Pyrops candelaria</i>           |
|-------------------------|--------|-----------|---------------------------------------------------------------------------------------------|------------------------------------------------------------------------|------------------------------------|------------------------------------|------------------------------------|-------------------------------------------|------------------------------------|
| <i>trnI</i>             | +      | GAT       |                                                                                             |                                                                        | 1-65 (65)                          | 1-65 (65)                          | 1-62 (62)                          | 1-63 (63)                                 | 1-64 (64)                          |
| <i>trnQ</i>             | -      | TTG       |                                                                                             |                                                                        | 69-137 (69)                        | 69-137 (69)                        | 81-149 (69)                        | 63-131 (69)                               | 74-143 (70)                        |
| <i>trnM</i>             | +      | CAT       |                                                                                             |                                                                        | 137-202 (66)                       | 137-202 (66)                       | 149-214 (66)                       | 131-196 (66)                              | 148-211 (64)                       |
| <i>ND2</i>              | +      |           | ATT <sup>a</sup> /ATA <sup>b</sup>                                                          | TAA <sup>1</sup> /TAG <sup>2</sup>                                     | 203-1180 (978) <sup>a, 1</sup>     | 203-1180 (978) <sup>a, 1</sup>     | 215-1180 (966) <sup>a, 1</sup>     | 197-1162 (966) <sup>b, 1</sup>            | 212-1180 (969) <sup>a, 1</sup>     |
| <i>trnW</i>             | +      | TCA       |                                                                                             |                                                                        | 1179-1246 (68)                     | 1179-1246 (68)                     | 1179-1243 (65)                     | 1161-1224 (64)                            | 1214-1281 (68)                     |
| <i>trnC</i>             | -      | GCA       |                                                                                             |                                                                        | 1239-1302 (64)                     | 1239-1302 (64)                     | 1236-1295 (60)                     | 1217-1279 (63)                            | 1274-1341 (68)                     |
| <i>trnY</i>             | -      | GTA       |                                                                                             |                                                                        | 1310-1373 (64)                     | 1310-1373 (64)                     | 1296-1356 (61)                     | 1283-1344 (62)                            | 1342-1404 (63)                     |
| <i>COI</i>              | +      |           | ATC <sup>a</sup> /ATG <sup>b</sup> /ATA <sup>c</sup> /CTG <sup>d</sup>                      | TAA <sup>1</sup> /T <sup>2</sup>                                       | 1374-2918 (1545) <sup>a, 1</sup>   | 1374-2918 (1545) <sup>a, 1</sup>   | 1362-2897 (1536) <sup>b, 1</sup>   | 1351-2884 (1534) <sup>b, 2</sup>          | 1407-2949 (1543) <sup>a, 2</sup>   |
| <i>trnL<sub>2</sub></i> | +      | TAA       |                                                                                             |                                                                        | 2921-2983 (63)                     | 2921-2983 (63)                     | 2898-2959 (62)                     | 2885-2949 (65)                            | 2950-3015 (66)                     |
| <i>COII</i>             | +      |           | ATA <sup>a</sup> /ATG <sup>b</sup> /ATT <sup>c</sup>                                        | TAA <sup>1</sup> /T <sup>2</sup> /TAG <sup>3</sup>                     | 2984-3661 (678) <sup>a, 1</sup>    | 2984-3661 (678) <sup>a, 1</sup>    | 2960-3640 (681) <sup>a, 1</sup>    | 2951-3637 (687) <sup>a, 1</sup>           | 3024-3689 (666) <sup>b, 1</sup>    |
| <i>trnK</i>             | +      | CTT       |                                                                                             |                                                                        | 3672-3741 (70)                     | 3672-3741 (70)                     | 3641-3709 (69)                     | 3640-3706 (67)                            | 3692-3762 (71)                     |
| <i>trnD</i>             | +      | GTC       |                                                                                             |                                                                        | 3742-3810 (69)                     | 3742-3810 (69)                     | 3710-3772 (63)                     | 3707-3771 (65)                            | 3763-3825 (63)                     |
| <i>ATP8</i>             | +      |           | ATT <sup>a</sup> /ATA <sup>b</sup> /ATC <sup>c</sup>                                        | TAA <sup>1</sup> /TAG <sup>2</sup>                                     | 3811-3966 (156) <sup>a, 1</sup>    | 3811-3966 (156) <sup>a, 1</sup>    | 3773-3925 (153) <sup>a, 1</sup>    | 3772-3924 (153) <sup>a, 1</sup>           | 3826-3984 (159) <sup>a, 1</sup>    |
| <i>ATP6</i>             | +      |           | ATG <sup>a</sup> /ATA <sup>b</sup> /ATT <sup>c</sup>                                        | T <sup>1</sup> /TAG <sup>2</sup>                                       | 3960-4611 (652) <sup>a, 1</sup>    | 3960-4611 (652) <sup>a, 1</sup>    | 3919-4570 (652) <sup>a, 1</sup>    | 3918-4569 (652) <sup>a, 1</sup>           | 3978-4629 (652) <sup>a, 1</sup>    |
| <i>COIII</i>            | +      |           | ATG <sup>a</sup> /ATT <sup>b</sup>                                                          | TAG <sup>1</sup> /T <sup>2</sup> /TAA <sup>3</sup>                     | 4612-5394 (783) <sup>a, 3</sup>    | 4612-5394 (783) <sup>a, 3</sup>    | 4571-5353 (783) <sup>a, 3</sup>    | 4570-5350 (781) <sup>a, 2</sup>           | 4630-5412 (783) <sup>a, 3</sup>    |
| <i>trnG</i>             | +      | TCC       |                                                                                             |                                                                        | 5401-5465 (65)                     | 5401-5465 (65)                     | 5355-5415 (61)                     | 5351-5412 (62)                            | 5419-5481 (63)                     |
| <i>ND3</i>              | +      |           | ATG <sup>a</sup> /ATT <sup>b</sup> /ATC <sup>c</sup><br>/ATA <sup>d</sup>                   | TAA <sup>1</sup> /TA <sup>2</sup> /TAG <sup>3</sup><br>/T <sup>4</sup> | 5467-5817 (351) <sup>a, 1</sup>    | 5467-5817 (351) <sup>a, 1</sup>    | 5451-5786 (336) <sup>b, 1</sup>    | 5413-5760 (348) <sup>b, 1</sup>           | 5482-5829 (348) <sup>b, 1</sup>    |
| <i>trnA</i>             | +      | TGC       |                                                                                             |                                                                        | 5816-5883 (68)                     | 5816-5883 (68)                     | 5786-5848 (63)                     | 5761-5825 (65)                            | 5847-5917 (71)                     |
| <i>trnR</i>             | +      | TCG       |                                                                                             |                                                                        | 5901-5964 (64)                     | 5901-5964 (64)                     | 5849-5909 (61)                     | 5826-5886 (61)                            | 5922-5986 (65)                     |
| <i>trnN</i>             | +      | GTT       |                                                                                             |                                                                        | 5990-6054 (65)                     | 5990-6054 (65)                     | 5911-5973 (63)                     | 5892-5953 (62)                            | 5987-6051 (65)                     |
| <i>trnS<sub>I</sub></i> | +      | GCT       |                                                                                             |                                                                        | 6056-6116 (61)                     | 6056-6116 (61)                     | 5972-6031 (60)                     | 5954-6014 (61)                            | 6050-6111 (62)                     |
| <i>trnE</i>             | +      | TTC       |                                                                                             |                                                                        | 6120-6184 (65)                     | 6120-6184 (65)                     | 6034-6095 (62)                     | 6017-6078 (62)                            | 6114-6174 (61)                     |
| <i>trnF</i>             | -      | GAA       |                                                                                             |                                                                        | 6197-6261 (65)                     | 6197-6261 (65)                     | 6094-6156 (63)                     | 6082-6145 (64)                            | 6173-6237 (65)                     |
| <i>ND5</i>              | -      |           | ATG <sup>a</sup> /ATT <sup>b</sup> /TTG <sup>c</sup><br>/ATA <sup>d</sup> /GTG <sup>e</sup> | TAA <sup>1</sup> /TAG <sup>2</sup> /T <sup>3</sup>                     | 6268-7950 (1683) <sup>a, 1</sup>   | 6268-7950 (1683) <sup>a, 1</sup>   | 6156-7835 (1680) <sup>e, 1</sup>   | 6136-7782 (1647) <sup>a, 2</sup>          | 6238-7909 (1672) <sup>a, 3</sup>   |
| <i>trnH</i>             | -      | GTG       |                                                                                             |                                                                        | 7952-8016 (65)                     | 7952-8016 (65)                     | 7836-7897 (62)                     | 7792-7858 (67)                            | 7910-7971 (62)                     |
| <i>ND4</i>              | -      |           | ATG <sup>a</sup> /ATT <sup>b</sup> /ATA <sup>c</sup>                                        | TAG <sup>1</sup> /T <sup>2</sup> /TAA <sup>3</sup> /TA <sup>4</sup>    | 8031-9362 (1332) <sup>a, 1</sup>   | 8031-9362 (1332) <sup>a, 1</sup>   | 7898-9221 (1324) <sup>a, 2</sup>   | 7859-9179 (1321) <sup>a, 2</sup>          | 7976-9290 (1315) <sup>a, 2</sup>   |
| <i>ND4L</i>             | -      |           | ATG <sup>a</sup> /ATT <sup>b</sup>                                                          | TAA <sup>1</sup> /TAG <sup>2</sup>                                     | 9362-9634 (273) <sup>a, 1</sup>    | 9362-9634 (273) <sup>a, 1</sup>    | 9223-9495 (273) <sup>a, 1</sup>    | 9188-9469 (282) <sup>a, 2</sup>           | 9284-9577 (294) <sup>b, 1</sup>    |
| <i>trnT</i>             | +      | TGT       |                                                                                             |                                                                        | 9637-9700 (64)                     | 9637-9700 (64)                     | 9498-9558 (61)                     | 9472-9532 (61)                            | 9594-9657 (64)                     |
| <i>trnP</i>             | -      | TGG       |                                                                                             |                                                                        | 9708-9773 (66)                     | 9708-9773 (66)                     | 9560-9622 (63)                     | 9536-9597 (62)                            | 9661-9721 (61)                     |
| <i>ND6</i>              | +      |           | ATA <sup>a</sup> /ATT <sup>b</sup> /ATC <sup>c</sup>                                        | TAA <sup>1</sup> /T <sup>2</sup>                                       | 9775-10275 (501) <sup>a, 1</sup>   | 9775-10275 (501) <sup>a, 1</sup>   | 9624-10121 (498) <sup>a, 1</sup>   | 9588-10091 (504) <sup>a, 1</sup>          | 9723-10217 (495) <sup>b, 1</sup>   |
| <i>CytB</i>             | +      |           | ATG <sup>a</sup> /ATA <sup>b</sup>                                                          | TAA <sup>1</sup> /TAG <sup>2</sup> /T <sup>3</sup>                     | 10280-11404 (1125) <sup>a, 1</sup> | 10280-11404 (1125) <sup>a, 1</sup> | 10114-11235 (1122) <sup>a, 1</sup> | 10084-11205 (1122) <sup>a, 1</sup>        | 10221-11333 (1113) <sup>a, 1</sup> |
| <i>trnS<sub>2</sub></i> | +      | TGA       |                                                                                             |                                                                        | 11420-11482 (63)                   | 11420-11482 (63)                   | 11235-11295 (61)                   | 11206-11266 (61)                          | 11351-11412 (62)                   |
| <i>ND1</i>              | -      |           | ATG <sup>a</sup> /GTG <sup>b</sup>                                                          | TAA <sup>1</sup> /T <sup>2</sup> /TA <sup>3</sup><br>/TAG <sup>4</sup> | 11492-12442 (951) <sup>a, 1</sup>  | 11492-12442 (951) <sup>a, 1</sup>  | 11289-12230 (942) <sup>a, 1</sup>  | 11273-12205 (933) <sup>a, 1</sup>         | 11406-12359 (954) <sup>b, 1</sup>  |
| <i>trnL<sub>I</sub></i> | -      | TAG       |                                                                                             |                                                                        | 12444-12508 (65)                   | 12444-12508 (65)                   | 12232-12293 (62)                   | 12207-12268 (62)                          | 12361-12423 (63)                   |
| <i>lrRNA</i>            | -      |           |                                                                                             |                                                                        | 12509-13734 (1226)                 | 12509-13734 (1226)                 | 12294-13497 (1205)                 | 12269-13466 (1198)                        | 12424-13637 (1214)                 |
| <i>trnV</i>             | -      | TAC       |                                                                                             |                                                                        | 13735-13807 (73)                   | 13735-13807 (73)                   | 13498-13567 (70)                   | 13467-13540 (74)                          | 13638-13712 (75)                   |
| <i>srRNA</i>            | -      |           |                                                                                             |                                                                        | 13808-14524 (717)                  | 13808-14524 (717)                  | 13567-14290 (724)                  | 13541-14269 (729)                         | 13713-14429 (717)                  |
| A+T-rich region         |        |           |                                                                                             |                                                                        | 14525-16312 (1788)                 | 14525-16314 (1790)                 | 14291-16126 (1836)                 | 14270-15971 (1702)                        | 14430-16021 (1592)                 |

| Gene                    | Strand | Anticodon | Start codon                                                                                 | Stop codon                                                             | <i>Lycorma delicatula</i><br>(Henan, China) | <i>Lycorma delicatula</i><br>(China) | <i>Lycorma delicatula</i><br>(Korea) | <i>Aphaena (Callidepsa)</i><br><i>amabilis</i> | <i>Aphaena (Aphaena)</i><br><i>discolor nigrotibiata</i> |
|-------------------------|--------|-----------|---------------------------------------------------------------------------------------------|------------------------------------------------------------------------|---------------------------------------------|--------------------------------------|--------------------------------------|------------------------------------------------|----------------------------------------------------------|
| <i>trnI</i>             | +      | GAT       |                                                                                             |                                                                        | 1-64 (64)                                   | 1-64 (64)                            | 1-64 (64)                            | 1-63 (63)                                      | 1-64 (64)                                                |
| <i>trnQ</i>             | -      | TTG       |                                                                                             |                                                                        | 67-135 (69)                                 | 67-135 (69)                          | 67-135 (69)                          | 66-134 (69)                                    | 67-135 (69)                                              |
| <i>trnM</i>             | +      | CAT       |                                                                                             |                                                                        | 135-197 (63)                                | 135-197 (63)                         | 135-197 (66)                         | 134-197 (64)                                   | 135-197 (63)                                             |
| <i>ND2</i>              | +      |           | ATT <sup>a</sup> /ATA <sup>b</sup>                                                          | TAA <sup>1</sup> /TAG <sup>2</sup>                                     | 198-1163 (966) <sup>a, 1</sup>              | 198-1163 (966) <sup>a, 1</sup>       | 198-1163 (966) <sup>a, 1</sup>       | 198-1166 (969) <sup>a, 1</sup>                 | 198-1166 (969) <sup>a, 1</sup>                           |
| <i>trnW</i>             | +      | TCA       |                                                                                             |                                                                        | 1166-1229 (64)                              | 1166-1229 (64)                       | 1166-1229 (64)                       | 1165-1226 (62)                                 | 1169-1230 (62)                                           |
| <i>trnC</i>             | -      | GCA       |                                                                                             |                                                                        | 1222-1283 (62)                              | 1222-1283 (62)                       | 1222-1283 (62)                       | 1219-1281 (63)                                 | 1223-1282 (60)                                           |
| <i>trnY</i>             | -      | GTA       |                                                                                             |                                                                        | 1284-1344 (61)                              | 1284-1345 (62)                       | 1284-1344 (61)                       | 1291-1352 (62)                                 | 1286-1347 (62)                                           |
| <i>COI</i>              | +      |           | ATC <sup>a</sup> /ATG <sup>b</sup> /ATA <sup>c</sup> /CTG <sup>d</sup>                      | TAA <sup>1</sup> /T <sup>2</sup>                                       | 1349-2885 (1537) <sup>b, 2</sup>            | 1350-2886 (1537) <sup>b, 2</sup>     | 1349-2885 (1537) <sup>b, 2</sup>     | 1357-2890 (1534) <sup>b, 2</sup>               | 1353-2886 (1534) <sup>b, 2</sup>                         |
| <i>trnL<sub>2</sub></i> | +      | TAA       |                                                                                             |                                                                        | 2886-2953 (68)                              | 2887-2954 (68)                       | 2886-2953 (68)                       | 2891-2959 (69)                                 | 2887-2954 (68)                                           |
| <i>COII</i>             | +      |           | ATA <sup>a</sup> /ATG <sup>b</sup> /ATT <sup>c</sup>                                        | TAA <sup>1</sup> /T <sup>2</sup> /TAG <sup>3</sup>                     | 2954-3625 (672) <sup>a, 1</sup>             | 2955-3626 (672) <sup>a, 1</sup>      | 2954-3625 (672) <sup>a, 1</sup>      | 2960-3637 (678) <sup>b, 1</sup>                | 2955-3632 (678) <sup>b, 1</sup>                          |
| <i>trnK</i>             | +      | CTT       |                                                                                             |                                                                        | 3636-3705 (70)                              | 3637-3706 (70)                       | 3636-3705 (70)                       | 3647-3716 (70)                                 | 3642-3711 (70)                                           |
| <i>trnD</i>             | +      | GTC       |                                                                                             |                                                                        | 3706-3768 (63)                              | 3707-3770 (64)                       | 3706-3769 (64)                       | 3717-3779 (63)                                 | 3712-3779 (68)                                           |
| <i>ATP8</i>             | +      |           | ATT <sup>a</sup> /ATA <sup>b</sup> /ATC <sup>c</sup>                                        | TAA <sup>1</sup> /TAG <sup>2</sup>                                     | 3769-3930 (162) <sup>a, 1</sup>             | 3771-3932 (162) <sup>a, 1</sup>      | 3770-3931 (162) <sup>a, 1</sup>      | 3780-3941 (162) <sup>a, 1</sup>                | 3780-3935 (156) <sup>b, 1</sup>                          |
| <i>ATP6</i>             | +      |           | ATG <sup>a</sup> /ATA <sup>b</sup> /ATT <sup>c</sup>                                        | T <sup>1</sup> /TAG <sup>2</sup>                                       | 3924-4575 (652) <sup>a, 1</sup>             | 3926-4577 (652) <sup>a, 1</sup>      | 3925-4576 (652) <sup>a, 1</sup>      | 3935-4592 (658) <sup>a, 1</sup>                | 3929-4583 (655) <sup>a, 1</sup>                          |
| <i>COIII</i>            | +      |           | ATG <sup>a</sup> /ATT <sup>b</sup>                                                          | TAG <sup>1</sup> /T <sup>2</sup> /TAA <sup>3</sup>                     | 4576-5358 (783) <sup>a, 3</sup>             | 4578-5360 (783) <sup>a, 3</sup>      | 4577-5359 (783) <sup>a, 3</sup>      | 4593-5375 (783) <sup>a, 3</sup>                | 4584-5366 (783) <sup>a, 3</sup>                          |
| <i>trnG</i>             | +      | TCC       |                                                                                             |                                                                        | 5364-5427 (64)                              | 5363-5426 (64)                       | 5362-5425 (64)                       | 5379-5443 (65)                                 | 5374-5436 (63)                                           |
| <i>ND3</i>              | +      |           | ATG <sup>a</sup> /ATT <sup>b</sup> /ATC <sup>c</sup><br>/ATA <sup>d</sup>                   | TAA <sup>1</sup> /TA <sup>2</sup> /TAG <sup>3</sup><br>/T <sup>4</sup> | 5428-5769 (342) <sup>c, 1</sup>             | 5427-5773 (347) <sup>b, 2</sup>      | 5426-5773 (348) <sup>b, 1</sup>      | 5444-5791 (348) <sup>b, 1</sup>                | 5437-5784 (348) <sup>b, 1</sup>                          |
| <i>trnA</i>             | +      | TGC       |                                                                                             |                                                                        | 5795-5859 (65)                              | 5774-5838 (65)                       | 5773-5837 (65)                       | 5798-5862 (65)                                 | 5784-5848 (65)                                           |
| <i>trnR</i>             | +      | TCG       |                                                                                             |                                                                        | 5856-5927 (72)                              | 5839-5905 (67)                       | 5838-5904 (67)                       | 5864-5924 (61)                                 | 5850-5910 (61)                                           |
| <i>trnN</i>             | +      | GTT       |                                                                                             |                                                                        | 5927-5988 (62)                              | 5905-5966 (62)                       | 5904-5965 (62)                       | 5932-5993 (62)                                 | 5919-5980 (62)                                           |
| <i>trnS<sub>I</sub></i> | +      | GCT       |                                                                                             |                                                                        | 5987-6046 (60)                              | 5966-6023 (58)                       | 5964-6023 (60)                       | 5993-6050 (58)                                 | 5980-6039 (60)                                           |
| <i>trnE</i>             | +      | TTC       |                                                                                             |                                                                        | 6045-6106 (62)                              | 6023-6085 (63)                       | 6022-6084 (63)                       | 6050-6115 (66)                                 | 6039-6100 (62)                                           |
| <i>trnF</i>             | -      | GAA       |                                                                                             |                                                                        | 6105-6168 (64)                              | 6084-6146 (63)                       | 6083-6145 (63)                       | 6114-6176 (63)                                 | 6099-6161 (63)                                           |
| <i>ND5</i>              | -      |           | ATG <sup>a</sup> /ATT <sup>b</sup> /TTG <sup>c</sup><br>/ATA <sup>d</sup> /GTG <sup>e</sup> | TAA <sup>1</sup> /TAG <sup>2</sup> /T <sup>3</sup>                     | 6159-7820 (1662) <sup>a, 2</sup>            | 6147-7824 (1678) <sup>a, 3</sup>     | 6146-7823 (1678) <sup>a, 3</sup>     | 6178-7885 (1708) <sup>a, 3</sup>               | 6164-7871 (1708) <sup>a, 3</sup>                         |
| <i>trnH</i>             | -      | GTG       |                                                                                             |                                                                        | 7820-7883 (64)                              | 7824-7887 (64)                       | 7823-7886 (64)                       | 7886-7947 (62)                                 | 7872-7933 (62)                                           |
| <i>ND4</i>              | -      |           | ATG <sup>a</sup> /ATT <sup>b</sup> /ATA <sup>c</sup>                                        | TAG <sup>1</sup> /T <sup>2</sup> /TAA <sup>3</sup> /TA <sup>4</sup>    | 7868-9208 (1341) <sup>a, 3</sup>            | 7888-9211 (1324) <sup>a, 2</sup>     | 7887-9210 (1324) <sup>a, 2</sup>     | 7949-9272 (1324) <sup>a, 2</sup>               | 7935-9258 (1324) <sup>a, 2</sup>                         |
| <i>ND4L</i>             | -      |           | ATG <sup>a</sup> /ATT <sup>b</sup>                                                          | TAA <sup>1</sup> /TAG <sup>2</sup>                                     | 9202-9477 (276) <sup>a, 1</sup>             | 9205-9480 (276) <sup>a, 1</sup>      | 9204-9479 (276) <sup>a, 1</sup>      | 9266-9541 (276) <sup>a, 1</sup>                | 9252-9527 (276) <sup>a, 1</sup>                          |
| <i>trnT</i>             | +      | TGT       |                                                                                             |                                                                        | 9485-9550 (66)                              | 9488-9553 (66)                       | 9487-9552 (66)                       | 9549-9613 (65)                                 | 9535-9599 (65)                                           |
| <i>trnP</i>             | -      | TGG       |                                                                                             |                                                                        | 9554-9615 (62)                              | 9557-9618 (62)                       | 9556-9617 (62)                       | 9620-9681 (62)                                 | 9602-9664 (63)                                           |
| <i>ND6</i>              | +      |           | ATA <sup>a</sup> /ATT <sup>b</sup> /ATC <sup>c</sup>                                        | TAA <sup>1</sup> /T <sup>2</sup>                                       | 9617-10117 (501) <sup>b, 1</sup>            | 9620-10120 (501) <sup>b, 1</sup>     | 9619-10119 (501) <sup>b, 1</sup>     | 9683-10183 (501) <sup>a, 1</sup>               | 9666-10166 (501) <sup>b, 1</sup>                         |
| <i>CytB</i>             | +      |           | ATG <sup>a</sup> /ATA <sup>b</sup>                                                          | TAA <sup>1</sup> /TAG <sup>2</sup> /T <sup>3</sup>                     | 10110-11228 (1119) <sup>a, 1</sup>          | 10113-11231 (1119) <sup>a, 1</sup>   | 10124-11230 (1107) <sup>b, 1</sup>   | 10176-11294 (1119) <sup>a, 1</sup>             | 10159-11280 (1122) <sup>a, 1</sup>                       |
| <i>trnS<sub>2</sub></i> | +      | TGA       |                                                                                             |                                                                        | 11234-11297 (64)                            | 11237-11300 (64)                     | 11236-11299 (64)                     | 11296-11358 (63)                               | 11281-11342 (62)                                         |
| <i>ND1</i>              | -      |           | ATG <sup>a</sup> /GTG <sup>b</sup>                                                          | TAA <sup>1</sup> /T <sup>2</sup> /TA <sup>3</sup><br>/TAG <sup>4</sup> | 11290-12234 (945) <sup>a, 1</sup>           | 11293-12237 (945) <sup>a, 1</sup>    | 11292-12236 (945) <sup>a, 1</sup>    | 11362-12301 (940) <sup>a, 2</sup>              | 11347-12285 (939) <sup>a, 1</sup>                        |
| <i>trnL<sub>1</sub></i> | -      | TAG       |                                                                                             |                                                                        | 12236-12298 (63)                            | 12239-12301 (63)                     | 12238-12300 (63)                     | 12303-12364 (62)                               | 12287-12348 (62)                                         |
| <i>lrRNA</i>            | -      |           |                                                                                             |                                                                        | 12299-13512 (1214)                          | 12302-13513 (1212)                   | 12301-13509 (1209)                   | 12365-13574 (1210)                             | 12349-13558 (1210)                                       |
| <i>trnV</i>             | -      | TAC       |                                                                                             |                                                                        | 13513-13583 (71)                            | 13514-13575 (62)                     | 13510-13571 (62)                     | 13575-13638 (64)                               | 13559-13619 (61)                                         |
| <i>srRNA</i>            | -      |           |                                                                                             |                                                                        | 13584-14304 (721)                           | 13576-14367 (792)                    | 13569-14303 (735)                    | 13639-14368 (730)                              | 13620-14352 (733)                                        |
| A+T-rich region         |        |           |                                                                                             |                                                                        | 14305-15946 (1642)                          | 14368-15410 (1043)                   | 14304-15798 (1495)                   | 14369-16237 (1869)                             | 14353-16116 (1764)                                       |

| Gene                    | Strand | Anticodon | Start codon                                                                                 | Stop codon                                                             | <i>Betatropis formosana</i>       | <i>Magadhaideus luodiana</i> sp. nov | <i>Peltatavertexalis horizontalis</i> sp. nov | <i>Plectoderini</i> sp.           | <i>Paracatonidia</i> sp.          |
|-------------------------|--------|-----------|---------------------------------------------------------------------------------------------|------------------------------------------------------------------------|-----------------------------------|--------------------------------------|-----------------------------------------------|-----------------------------------|-----------------------------------|
| <i>trnI</i>             | +      | GAT       |                                                                                             |                                                                        | 1-64 (64)                         | 1-65 (65)                            | 1-64 (64)                                     | 1-64 (64)                         | 1-64 (64)                         |
| <i>trnQ</i>             | -      | TTG       |                                                                                             |                                                                        | 62-130 (69)                       | 68-136 (69)                          | 62-130 (69)                                   | 62-130 (69)                       | 62-130 (69)                       |
| <i>trnM</i>             | +      | CAT       |                                                                                             |                                                                        | 130-192 (63)                      | 136-201 (66)                         | 130-194 (65)                                  | 130-196 (67)                      | 130-193 (64)                      |
| <i>ND2</i>              | +      |           | ATT <sup>a</sup> /ATA <sup>b</sup>                                                          | TAA <sup>1</sup> /TAG <sup>2</sup>                                     | 193-1161 (969) <sup>a,1</sup>     | 202-1170 (969) <sup>a,1</sup>        | 195-1160 (966) <sup>a,1</sup>                 | 197-1162 (966) <sup>a,1</sup>     | 194-1162 (969) <sup>a,1</sup>     |
| <i>trnW</i>             | +      | TCA       |                                                                                             |                                                                        | 1160-1223 (64)                    | 1169-1239 (71)                       | 1159-1221 (63)                                | 1161-1227 (67)                    | 1161-1225 (65)                    |
| <i>trnC</i>             | -      | GCA       |                                                                                             |                                                                        | 1216-1278 (63)                    | 1232-1298 (67)                       | 1214-1277 (64)                                | 1220-1282 (63)                    | 1218-1278 (61)                    |
| <i>trnY</i>             | -      | GTA       |                                                                                             |                                                                        | 1291-1352 (62)                    | 1307-1369 (63)                       | 1283-1344 (62)                                | 1291-1352 (62)                    | 1282-1343 (62)                    |
| <i>COI</i>              | +      |           | ATC <sup>a</sup> /ATG <sup>b</sup> /ATA <sup>c</sup> /CTG <sup>d</sup>                      | TAA <sup>1</sup> /T <sup>2</sup>                                       | 1369-2902 (1534) <sup>b,2</sup>   | 1370-2903 (1534) <sup>b,2</sup>      | 1345-2878 (1534) <sup>b,2</sup>               | 1355-2888 (1534) <sup>b,2</sup>   | 1344-2877 (1534) <sup>b,2</sup>   |
| <i>trnL<sub>2</sub></i> | +      | TAA       |                                                                                             |                                                                        | 2903-2966 (64)                    | 2904-2965 (62)                       | 2879-2940 (62)                                | 2889-2951 (63)                    | 2878-2943 (66)                    |
| <i>COII</i>             | +      |           | ATA <sup>a</sup> /ATG <sup>b</sup> /ATT <sup>c</sup>                                        | TAA <sup>1</sup> /T <sup>2</sup> /TAG <sup>3</sup>                     | 2967-3636 (670) <sup>c,2</sup>    | 2966-3635 (670) <sup>c,2</sup>       | 2941-3610 (670) <sup>a,2</sup>                | 2952-3620 (669) <sup>a,1</sup>    | 2944-3616 (673) <sup>b,2</sup>    |
| <i>trnK</i>             | +      | CTT       |                                                                                             |                                                                        | 3637-3704 (68)                    | 3636-3704 (69)                       | 3611-3680 (70)                                | 3622-3690 (69)                    | 3617-3686 (70)                    |
| <i>trnD</i>             | +      | GTC       |                                                                                             |                                                                        | 3705-3766 (62)                    | 3705-3766 (62)                       | 3681-3743 (63)                                | 3691-3762 (72)                    | 3687-3748 (62)                    |
| <i>ATP8</i>             | +      |           | ATT <sup>a</sup> /ATA <sup>b</sup> /ATC <sup>c</sup>                                        | TAA <sup>1</sup> /TAG <sup>2</sup>                                     | 3767-3940 (174) <sup>b,1</sup>    | 3767-3931 (165) <sup>b,1</sup>       | 3744-3902 (159) <sup>b,2</sup>                | 3763-3924 (162) <sup>b,1</sup>    | 3749-3901 (153) <sup>b,1</sup>    |
| <i>ATP6</i>             | +      |           | ATG <sup>a</sup> /ATA <sup>b</sup> /ATT <sup>c</sup>                                        | T <sup>1</sup> /TAG <sup>2</sup>                                       | 3934-4585 (652) <sup>a,1</sup>    | 3925-4576 (652) <sup>a,1</sup>       | 3896-4547 (652) <sup>a,1</sup>                | 3918-4569 (652) <sup>a,1</sup>    | 3895-4546 (652) <sup>a,1</sup>    |
| <i>COIII</i>            | +      |           | ATG <sup>a</sup> /ATT <sup>b</sup>                                                          | TAG <sup>1</sup> /T <sup>2</sup> /TAA <sup>3</sup>                     | 4586-5368 (783) <sup>a,3</sup>    | 4577-5357 (781) <sup>a,2</sup>       | 4548-5330 (783) <sup>a,3</sup>                | 4570-5350 (781) <sup>a,2</sup>    | 4547-5327 (781) <sup>a,2</sup>    |
| <i>trnG</i>             | +      | TCC       |                                                                                             |                                                                        | 5368-5428 (61)                    | 5358-5419 (62)                       | 5331-5395 (65)                                | 5351-5414 (64)                    | 5328-5388 (61)                    |
| <i>ND3</i>              | +      |           | ATG <sup>a</sup> /ATT <sup>b</sup> /ATC <sup>c</sup><br>/ATA <sup>d</sup>                   | TAA <sup>1</sup> /TA <sup>2</sup> /TAG <sup>3</sup><br>/T <sup>4</sup> | 5435-5776 (342) <sup>b,3</sup>    | 5420-5765 (346) <sup>b,4</sup>       | 5396-5743 (348) <sup>d,1</sup>                | 5415-5762 (348) <sup>d,1</sup>    | 5389-5736 (348) <sup>b,1</sup>    |
| <i>trnA</i>             | +      | TGC       |                                                                                             |                                                                        | 5775-5840 (66)                    | 5766-5830 (65)                       | 5747-5809 (63)                                | 5762-5829 (68)                    | 5736-5800 (65)                    |
| <i>trnR</i>             | +      | TCG       |                                                                                             |                                                                        | 5847-5908 (62)                    | 5831-5889 (59)                       | 5813-5872 (60)                                | 5835-5895 (61)                    | 5801-5862 (62)                    |
| <i>trnN</i>             | +      | GTT       |                                                                                             |                                                                        | 5911-5972 (62)                    | 5902-5965 (64)                       | 5874-5936 (63)                                | 5902-5965 (64)                    | 5863-5925 (63)                    |
| <i>trnS<sub>I</sub></i> | +      | GCT       |                                                                                             |                                                                        | 5973-6032 (60)                    | 5966-6020 (55)                       | 5937-5992 (56)                                | 5966-6025 (60)                    | 5925-5987 (63)                    |
| <i>trnE</i>             | +      | TTC       |                                                                                             |                                                                        | 6039-6102 (64)                    | 6029-6091 (63)                       | 5993-6056 (64)                                | 6026-6088 (63)                    | 5991-6052 (62)                    |
| <i>trnF</i>             | -      | GAA       |                                                                                             |                                                                        | 6105-6167 (63)                    | 6091-6153 (63)                       | 6061-6127 (67)                                | 6088-6151 (64)                    | 6056-6122 (67)                    |
| <i>ND5</i>              | -      |           | ATG <sup>a</sup> /ATT <sup>b</sup> /TTG <sup>c</sup><br>/ATA <sup>d</sup> /GTG <sup>e</sup> | TAA <sup>1</sup> /TAG <sup>2</sup> /T <sup>3</sup>                     | 6178-7875 (1698) <sup>b,1</sup>   | 6156-7850 (1695) <sup>c,2</sup>      | 6122-7828 (1707) <sup>a,2</sup>               | 6154-7860 (1707) <sup>a,2</sup>   | 6103-7824 (1722) <sup>d,1</sup>   |
| <i>trnH</i>             | -      | GTG       |                                                                                             |                                                                        | 7881-7943 (63)                    | 7859-7920 (62)                       | 7845-7906 (62)                                | 7864-7925 (62)                    | 7818-7880 (63)                    |
| <i>ND4</i>              | -      |           | ATG <sup>a</sup> /ATT <sup>b</sup> /ATA <sup>c</sup>                                        | TAG <sup>1</sup> /T <sup>2</sup> /TAA <sup>3</sup> /TA <sup>4</sup>    | 7945-9289 (1345) <sup>a,2</sup>   | 7922-9245 (1324) <sup>a,2</sup>      | 7908-9189 (1282) <sup>b,2</sup>               | 7927-9229 (1303) <sup>a,2</sup>   | 7882-9121 (1240) <sup>a,2</sup>   |
| <i>ND4L</i>             | -      |           | ATG <sup>a</sup> /ATT <sup>b</sup>                                                          | TAA <sup>1</sup> /TAG <sup>2</sup>                                     | 9283-9555 (273) <sup>a,1</sup>    | 9239-9511 (273) <sup>a,1</sup>       | 9235-9507 (273) <sup>a,1</sup>                | 9278-9550 (273) <sup>a,1</sup>    | 9191-9463 (273) <sup>a,1</sup>    |
| <i>trnT</i>             | +      | TGT       |                                                                                             |                                                                        | 9558-9620 (63)                    | 9514-9575 (62)                       | 9510-9573 (64)                                | 9552-9613 (62)                    | 9467-9529 (63)                    |
| <i>trnP</i>             | -      | TGG       |                                                                                             |                                                                        | 9628-9689 (62)                    | 9578-9640 (63)                       | 9574-9636 (63)                                | 9614-9676 (63)                    | 9531-9595 (65)                    |
| <i>ND6</i>              | +      |           | ATA <sup>a</sup> /ATT <sup>b</sup> /ATC <sup>c</sup>                                        | TAA <sup>1</sup> /T <sup>2</sup>                                       | 9691-10197 (507) <sup>a,1</sup>   | 9642-10142 (501) <sup>b,1</sup>      | 9638-10144 (507) <sup>a,1</sup>               | 9678-10181 (504) <sup>b,1</sup>   | 9597-10091 (495) <sup>c,1</sup>   |
| <i>CytB</i>             | +      |           | ATG <sup>a</sup> /ATA <sup>b</sup>                                                          | TAA <sup>1</sup> /TAG <sup>2</sup> /T <sup>3</sup>                     | 10190-11311 (1122) <sup>a,1</sup> | 10135-11256 (1122) <sup>a,1</sup>    | 10137-11258 (1122) <sup>a,1</sup>             | 10174-11295 (1122) <sup>a,1</sup> | 10098-11222 (1125) <sup>a,1</sup> |
| <i>trnS<sub>2</sub></i> | +      | TGA       |                                                                                             |                                                                        | 11311-11376 (66)                  | 11256-11319 (64)                     | 11258-11321 (64)                              | 11295-11357 (63)                  | 11222-11285 (64)                  |
| <i>NDI</i>              | -      |           | ATG <sup>a</sup> /GTG <sup>b</sup>                                                          | TAA <sup>1</sup> /T <sup>2</sup> /TA <sup>3</sup><br>/TAG <sup>4</sup> | 11376-12320 (945) <sup>a,1</sup>  | 11316-12258 (943) <sup>b,2</sup>     | 11320-12261 (942) <sup>a,1</sup>              | 11351-12295 (945) <sup>b,1</sup>  | 11291-12234 (944) <sup>b,3</sup>  |
| <i>trnL<sub>1</sub></i> | -      | TAG       |                                                                                             |                                                                        | 12322-12384 (63)                  | 12260-12325 (66)                     | 12263-12325 (63)                              | 12297-12360 (64)                  | 12236-12301 (66)                  |
| <i>lrRNA</i>            | -      |           |                                                                                             |                                                                        | 12403-13584 (1182)                | 12329-13541 (1213)                   | 12326-12530 (205)                             | 12364-13562 (1199)                | 12302-13499 (1198)                |
| <i>trnV</i>             | -      | TAC       |                                                                                             |                                                                        | 13598-13660 (63)                  | 13549-13612 (64)                     | 13539-13602 (64)                              | 13578-13640 (63)                  | 13518-13582 (65)                  |
| <i>srRNA</i>            | -      |           |                                                                                             |                                                                        | 13658-14383 (726)                 | 13610-14335 (726)                    | 13600-14328 (729)                             | 13638-14366 (729)                 | 13580-14305 (726)                 |
| A+T-rich region         |        |           |                                                                                             |                                                                        | 14384-16161 (1778)                | 14336-15885 (1550)                   | 14329-15787 (1459)                            | 14367-16216 (1850)                | 14306-15214 (909)                 |

| Gene                    | Strand | Anticodon | Start codon                                                                                 | Stop codon                                                             | <i>Pentastiridius</i> sp. <sup>‡</sup> | <i>Lydda</i> sp. <sup>‡</sup>     | <i>Sivaloka damnosus</i>          | <i>Sivaloka</i> sp. <sup>‡</sup>  | <i>Ricania marginalis</i>         |
|-------------------------|--------|-----------|---------------------------------------------------------------------------------------------|------------------------------------------------------------------------|----------------------------------------|-----------------------------------|-----------------------------------|-----------------------------------|-----------------------------------|
| <i>trnI</i>             | +      | GAT       |                                                                                             |                                                                        | 1-68 (68)                              | 1-63 (63)                         | 1-66 (66)                         | 1-63 (63)                         | 1-64 (64)                         |
| <i>trnQ</i>             | -      | TTG       |                                                                                             |                                                                        | 66-132 (67)                            | 65-131 (67)                       | 67-135 (69)                       | 63-131 (69)                       | 69-137 (69)                       |
| <i>trnM</i>             | +      | CAT       |                                                                                             |                                                                        | 131-196 (66)                           | 132-196 (65)                      | 135-200 (66)                      | 131-193 (63)                      | 152-216 (65)                      |
| <i>ND2</i>              | +      |           | ATT <sup>a</sup> /ATA <sup>b</sup>                                                          | TAA <sup>1</sup> /TAG <sup>2</sup>                                     | 197-1156 (960) <sup>a,1</sup>          | 197-1156 (960) <sup>a,1</sup>     | 201-1166 (966) <sup>a,2</sup>     | 194-1159 (966) <sup>a,1</sup>     | 217-1182 (966) <sup>a,1</sup>     |
| <i>trnW</i>             | +      | TCA       |                                                                                             |                                                                        | 1155-1222 (68)                         | 1155-1217 (63)                    | 1167-1230 (64)                    | 1159-1219 (61)                    | 1210-1273 (64)                    |
| <i>trnC</i>             | -      | GCA       |                                                                                             |                                                                        | 1215-1276 (62)                         | 1210-1274 (65)                    | 1222-1284 (63)                    | 1212-1272 (61)                    | 1266-1328 (63)                    |
| <i>trnY</i>             | -      | GTA       |                                                                                             |                                                                        | 1277-1337 (61)                         | 1277-1337 (61)                    | 1301-1367 (67)                    | 1273-1336 (64)                    | 1341-1402 (62)                    |
| <i>COI</i>              | +      |           | ATC <sup>a</sup> /ATG <sup>b</sup> /ATA <sup>c</sup> /CTG <sup>d</sup>                      | TAA <sup>1</sup> /T <sup>2</sup>                                       | 1336-2869 (1534) <sup>d,2</sup>        | 1339-2872 (1534) <sup>b,2</sup>   | 1377-2912 (1536) <sup>b,1</sup>   | 1338-2871 (1534) <sup>b,2</sup>   | 1404-2945 (1542) <sup>c,1</sup>   |
| <i>trnL<sub>2</sub></i> | +      | TAA       |                                                                                             |                                                                        | 2874-2937 (64)                         | 2874-2935 (62)                    | 2908-2970 (63)                    | 2873-2935 (63)                    | 2947-3009 (63)                    |
| <i>COII</i>             | +      |           | ATA <sup>a</sup> /ATG <sup>b</sup> /ATT <sup>c</sup>                                        | TAA <sup>1</sup> /T <sup>2</sup> /TAG <sup>3</sup>                     | 2938-3606 (669) <sup>a,1</sup>         | 2936-3601 (666) <sup>a,1</sup>    | 2971-3642 (672) <sup>a,1</sup>    | 2936-3607 (672) <sup>a,1</sup>    | 3010-3682 (673) <sup>c,2</sup>    |
| <i>trnK</i>             | +      | CTT       |                                                                                             |                                                                        | 3608-3678 (71)                         | 3602-3672 (71)                    | 3643-3712 (70)                    | 3608-3677 (70)                    | 3683-3752 (70)                    |
| <i>trnD</i>             | +      | GTC       |                                                                                             |                                                                        | 3679-3742 (64)                         | 3674-3738 (65)                    | 3713-3774 (62)                    | 3678-3739 (62)                    | 3755-3818 (64)                    |
| <i>ATP8</i>             | +      |           | ATT <sup>a</sup> /ATA <sup>b</sup> /ATC <sup>c</sup>                                        | TAA <sup>1</sup> /TAG <sup>2</sup>                                     | 3743-3850 (108) <sup>a,1</sup>         | 3739-3888 (150) <sup>b,1</sup>    | 3775-3927 (153) <sup>a,1</sup>    | 3740-3892 (153) <sup>a,1</sup>    | 3819-3980 (162) <sup>b,1</sup>    |
| <i>ATP6</i>             | +      |           | ATG <sup>a</sup> /ATA <sup>b</sup> /ATT <sup>c</sup>                                        | T <sup>1</sup> /TAG <sup>2</sup>                                       | 3844-4498 (655) <sup>b,1</sup>         | 3883-4533 (651) <sup>a,1</sup>    | 3921-4572 (652) <sup>a,1</sup>    | 3886-4537 (652) <sup>a,1</sup>    | 3977-4654 (678) <sup>b,2</sup>    |
| <i>COIII</i>            | +      |           | ATG <sup>a</sup> /ATT <sup>b</sup>                                                          | TAG <sup>1</sup> /T <sup>2</sup> /TAA <sup>3</sup>                     | 4499-5281 (783) <sup>a,3</sup>         | 4534-5314 (781) <sup>a,2</sup>    | 4573-5355 (783) <sup>a,3</sup>    | 4538-5320 (783) <sup>a,3</sup>    | 4627-5409 (783) <sup>a,1</sup>    |
| <i>trnG</i>             | +      | TCC       |                                                                                             |                                                                        | 5281-5343 (63)                         | 5315-5376 (62)                    | 5376-5436 (61)                    | 5321-5381 (61)                    | 5413-5473 (61)                    |
| <i>ND3</i>              | +      |           | ATG <sup>a</sup> /ATT <sup>b</sup> /ATC <sup>c</sup><br>/ATA <sup>d</sup>                   | TAA <sup>1</sup> /TA <sup>2</sup> /TAG <sup>3</sup><br>/T <sup>4</sup> | 5344-5694 (351) <sup>b,1</sup>         | 5377-5724 (348) <sup>b,1</sup>    | 5437-5784 (348) <sup>b,1</sup>    | 5381-5728 (348) <sup>b,1</sup>    | 5474-5821 (348) <sup>d,1</sup>    |
| <i>trnA</i>             | +      | TGC       |                                                                                             |                                                                        | 5694-5758 (65)                         | 5724-5789 (66)                    | 5791-5857 (67)                    | 5728-5791 (64)                    | 5827-5891 (65)                    |
| <i>trnR</i>             | +      | TCG       |                                                                                             |                                                                        | 5758-5819 (62)                         | 5790-5850 (61)                    | 5858-5923 (66)                    | 5792-5851 (60)                    | 5892-5963 (72)                    |
| <i>trnN</i>             | +      | GTT       |                                                                                             |                                                                        | 5818-5882 (65)                         | 5850-5912 (63)                    | 5937-6002 (66)                    | 5852-5913 (62)                    | 5961-6028 (68)                    |
| <i>trnS<sub>I</sub></i> | +      | GCT       |                                                                                             |                                                                        | 5882-5951 (70)                         | 5913-5969 (57)                    | 6002-6060 (59)                    | 5913-5971 (59)                    | 6028-6088 (61)                    |
| <i>trnE</i>             | +      | TTC       |                                                                                             |                                                                        | 5951-6015 (65)                         | 5975-6038 (64)                    | 6069-6130 (62)                    | 5971-6032 (62)                    | 6090-6156 (67)                    |
| <i>trnF</i>             | -      | GAA       |                                                                                             |                                                                        | 6016-6080 (65)                         | 6037-6100 (64)                    | 6135-6199 (65)                    | 6031-6094 (64)                    | 6165-6230 (66)                    |
| <i>ND5</i>              | -      |           | ATG <sup>a</sup> /ATT <sup>b</sup> /TTG <sup>c</sup><br>/ATA <sup>d</sup> /GTG <sup>e</sup> | TAA <sup>1</sup> /TAG <sup>2</sup> /T <sup>3</sup>                     | 6165-7706 (1542) <sup>d,1</sup>        | 6101-7691 (1591) <sup>d,3</sup>   | 6206-7864 (1659) <sup>b,1</sup>   | 6093-7673 (1581) <sup>b,1</sup>   | 6237-7916 (1680) <sup>b,1</sup>   |
| <i>trnH</i>             | -      | GTG       |                                                                                             |                                                                        | 7847-7908 (62)                         | -                                 | 7870-7930 (61)                    | -                                 | 7918-7981 (64)                    |
| <i>ND4</i>              | -      |           | ATG <sup>a</sup> /ATT <sup>b</sup> /ATA <sup>c</sup>                                        | TAG <sup>1</sup> /T <sup>2</sup> /TAA <sup>3</sup> /TA <sup>4</sup>    | 7909-9213 (1305) <sup>b,2</sup>        | 7809-9122 (1314) <sup>b,1</sup>   | 7931-9245 (1315) <sup>a,2</sup>   | 7771-8997 (1227) <sup>c,2</sup>   | 7982-9302 (1321) <sup>a,2</sup>   |
| <i>ND4L</i>             | -      |           | ATG <sup>a</sup> /ATT <sup>b</sup>                                                          | TAA <sup>1</sup> /TAG <sup>2</sup>                                     | 9219-9494 (276) <sup>a,1</sup>         | 9128-9400 (273) <sup>a,1</sup>    | 9239-9511 (273) <sup>a,1</sup>    | 9149-9421 (273) <sup>a,1</sup>    | 9296-9565 (270) <sup>a,1</sup>    |
| <i>trnT</i>             | +      | TGT       |                                                                                             |                                                                        | 9506-9568 (63)                         | 9403-9465 (63)                    | 9514-9576 (63)                    | 9424-9486 (63)                    | 9568-9632 (65)                    |
| <i>trnP</i>             | -      | TGG       |                                                                                             |                                                                        | 9568-9631 (64)                         | 9465-9528 (64)                    | 9577-9639 (63)                    | 9487-9549 (63)                    | 9644-9709 (66)                    |
| <i>ND6</i>              | +      |           | ATA <sup>a</sup> /ATT <sup>b</sup> /ATC <sup>c</sup>                                        | TAA <sup>1</sup> /T <sup>2</sup>                                       | 9633-10127 (495) <sup>a,1</sup>        | 9530-10027 (498) <sup>c,1</sup>   | 9641-10132 (492) <sup>a,1</sup>   | 9551-10039 (489) <sup>a,1</sup>   | 9711-10205 (495) <sup>c,1</sup>   |
| <i>CytB</i>             | +      |           | ATG <sup>a</sup> /ATA <sup>b</sup>                                                          | TAA <sup>1</sup> /TAG <sup>2</sup> /T <sup>3</sup>                     | 10131-11246 (1116) <sup>a,1</sup>      | 10020-11144 (1125) <sup>a,1</sup> | 10125-11255 (1131) <sup>a,1</sup> | 10032-11153 (1122) <sup>a,2</sup> | 10198-11316 (1119) <sup>a,1</sup> |
| <i>trnS<sub>2</sub></i> | +      | TGA       |                                                                                             |                                                                        | 11248-11309 (62)                       | 11143-11205 (63)                  | 11255-11319 (65)                  | 11152-11213 (62)                  | 11303-11364 (62)                  |
| <i>NDI</i>              | -      |           | ATG <sup>a</sup> /GTG <sup>b</sup>                                                          | TAA <sup>1</sup> /T <sup>2</sup> /TA <sup>3</sup><br>/TAG <sup>4</sup> | -                                      | 11206-12139 (934) <sup>a,2</sup>  | 11324-12253 (930) <sup>a,4</sup>  | 11207-12145 (939) <sup>a,1</sup>  | 11361-12296 (936) <sup>a,1</sup>  |
| <i>trnL<sub>1</sub></i> | -      | TAG       |                                                                                             |                                                                        | -                                      | 12142-12203 (62)                  | 12255-12317 (63)                  | 12147-12209 (63)                  | 12298-12359 (62)                  |
| <i>lrRNA</i>            | -      |           |                                                                                             |                                                                        | -                                      | 12203-13404 (1202)                | 12318-13509 (1192)                | 12210-13418 (1209)                | 12360-13575 (1216)                |
| <i>trnV</i>             | -      | TAC       |                                                                                             |                                                                        | -                                      | 13405-13465 (61)                  | 13510-13582 (73)                  | 13419-13479 (61)                  | 13576-13638 (63)                  |
| <i>srRNA</i>            | -      |           |                                                                                             |                                                                        | -                                      | 13467-14191 (725)                 | 13583-14293 (711)                 | 13480-14279 (800)                 | 13639-14374 (736)                 |
| A+T-rich region         |        |           |                                                                                             |                                                                        | -                                      | 14191-14755 (565)                 | 14294-15287 (994)                 | 14280-15034 (755)                 | 14375-15698 (1324)                |

| Gene                    | Strand | Anticodon | Start codon                                                                                 | Stop codon                                                             | <i>Ricania speculum</i>            | <i>Ugyops</i> sp.                  |
|-------------------------|--------|-----------|---------------------------------------------------------------------------------------------|------------------------------------------------------------------------|------------------------------------|------------------------------------|
| <i>trnI</i>             | +      | GAT       |                                                                                             |                                                                        | 1-64 (64)                          | 1-64 (64)                          |
| <i>trnQ</i>             | -      | TTG       |                                                                                             |                                                                        | 69-137 (69)                        | 65-131 (67)                        |
| <i>trnM</i>             | +      | CAT       |                                                                                             |                                                                        | 152-216 (65)                       | 130-193 (64)                       |
| <i>ND2</i>              | +      |           | ATT <sup>a</sup> /ATA <sup>b</sup>                                                          | TAA <sup>1</sup> /TAG <sup>2</sup>                                     | 217-1182 (966) <sup>a, 1</sup>     | 194-1153 (960) <sup>a, 1</sup>     |
| <i>trnW</i>             | +      | TCA       |                                                                                             |                                                                        | 1209-1272 (64)                     | 1157-1219 (63)                     |
| <i>trnC</i>             | -      | GCA       |                                                                                             |                                                                        | 1265-1327 (63)                     | 1212-1272 (61)                     |
| <i>trnY</i>             | -      | GTA       |                                                                                             |                                                                        | 1332-1393 (62)                     | 1274-1334 (61)                     |
| <i>COI</i>              | +      |           | ATC <sup>a</sup> /ATG <sup>b</sup> /ATA <sup>c</sup> /CTG <sup>d</sup>                      | TAA <sup>1</sup> /T <sup>2</sup>                                       | 1398-2933 (1536) <sup>b, 1</sup>   | 1333-2866 (1534) <sup>d, 2</sup>   |
| <i>trnL<sub>2</sub></i> | +      | TAA       |                                                                                             |                                                                        | 2935-2997 (63)                     | 2867-2929 (63)                     |
| <i>COII</i>             | +      |           | ATA <sup>a</sup> /ATG <sup>b</sup> /ATT <sup>c</sup>                                        | TAA <sup>1</sup> /T <sup>2</sup> /TAG <sup>3</sup>                     | 2998-3679 (682) <sup>c, 2</sup>    | 2930-3601 (672) <sup>a, 1</sup>    |
| <i>trnK</i>             | +      | CTT       |                                                                                             |                                                                        | 3680-3749 (70)                     | 3603-3674 (72)                     |
| <i>trnD</i>             | +      | GTC       |                                                                                             |                                                                        | 3752-3815 (64)                     | 3675-3736 (62)                     |
| <i>ATP8</i>             | +      |           | ATT <sup>a</sup> /ATA <sup>b</sup> /ATC <sup>c</sup>                                        | TAA <sup>1</sup> /TAG <sup>2</sup>                                     | 3816-3977 (162) <sup>b, 1</sup>    | 3737-3844 (108) <sup>b, 1</sup>    |
| <i>ATP6</i>             | +      |           | ATG <sup>a</sup> /ATA <sup>b</sup> /ATT <sup>c</sup>                                        | T <sup>1</sup> /TAG <sup>2</sup>                                       | 3974-4622 (649) <sup>b, 1</sup>    | 3841-4492 (652) <sup>b, 1</sup>    |
| <i>COIII</i>            | +      |           | ATG <sup>a</sup> /ATT <sup>b</sup>                                                          | TAG <sup>1</sup> /T <sup>2</sup> /TAA <sup>3</sup>                     | 4623-5405 (783) <sup>a, 1</sup>    | 4493-5273 (781) <sup>a, 2</sup>    |
| <i>trnG</i>             | +      | TCC       |                                                                                             |                                                                        | 5409-5469 (61)                     | 5274-5333 (60)                     |
| <i>ND3</i>              | +      |           | ATG <sup>a</sup> /ATT <sup>b</sup> /ATC <sup>c</sup><br>/ATA <sup>d</sup>                   | TAA <sup>1</sup> /TA <sup>2</sup> /TAG <sup>3</sup><br>/T <sup>4</sup> | 5470-5817 (348) <sup>d, 1</sup>    | 5334-5684 (351) <sup>b, 3</sup>    |
| <i>trnA</i>             | +      | TGC       |                                                                                             |                                                                        | 5823-5887 (65)                     | 5683-5743 (61)                     |
| <i>trnR</i>             | +      | TCG       |                                                                                             |                                                                        | 5893-5954 (62)                     | 5750-5809 (60)                     |
| <i>trnN</i>             | +      | GTT       |                                                                                             |                                                                        | 5957-6024 (68)                     | 5808-5871 (64)                     |
| <i>trnS<sub>I</sub></i> | +      | GCT       |                                                                                             |                                                                        | 6024-6082 (59)                     | 5871-5931 (61)                     |
| <i>trnE</i>             | +      | TTC       |                                                                                             |                                                                        | 6084-6148 (65)                     | 5931-5996 (66)                     |
| <i>trnF</i>             | -      | GAA       |                                                                                             |                                                                        | 6156-6220 (65)                     | 5995-6058 (64)                     |
| <i>ND5</i>              | -      |           | ATG <sup>a</sup> /ATT <sup>b</sup> /TTG <sup>c</sup><br>/ATA <sup>d</sup> /GTG <sup>e</sup> | TAA <sup>1</sup> /TAG <sup>2</sup> /T <sup>3</sup>                     | 6226-7890 (1665) <sup>a, 1</sup>   | 6059-7739 (1681) <sup>c, 3</sup>   |
| <i>trnH</i>             | -      | GTG       |                                                                                             |                                                                        | 7906-7969 (64)                     | 7740-7803 (64)                     |
| <i>ND4</i>              | -      |           | ATG <sup>a</sup> /ATT <sup>b</sup> /ATA <sup>c</sup>                                        | TAG <sup>1</sup> /T <sup>2</sup> /TAA <sup>3</sup> /TA <sup>4</sup>    | 7970-9296 (1327) <sup>a, 2</sup>   | 7804-9121 (1318) <sup>a, 2</sup>   |
| <i>ND4L</i>             | -      |           | ATG <sup>a</sup> /ATT <sup>b</sup>                                                          | TAA <sup>1</sup> /TAG <sup>2</sup>                                     | 9290-9559 (270) <sup>a, 1</sup>    | 9115-9387 (273) <sup>a, 1</sup>    |
| <i>trnT</i>             | +      | TGT       |                                                                                             |                                                                        | 9562-9626 (65)                     | 9389-9451 (63)                     |
| <i>trnP</i>             | -      | TGG       |                                                                                             |                                                                        | 9638-9702 (65)                     | 9451-9514 (64)                     |
| <i>ND6</i>              | +      |           | ATA <sup>a</sup> /ATT <sup>b</sup> /ATC <sup>c</sup>                                        | TAA <sup>1</sup> /T <sup>2</sup>                                       | 9704-10198 (495) <sup>c, 1</sup>   | 9516-10008 (493) <sup>b, 2</sup>   |
| <i>CytB</i>             | +      |           | ATG <sup>a</sup> /ATA <sup>b</sup>                                                          | TAA <sup>1</sup> /TAG <sup>2</sup> /T <sup>3</sup>                     | 10191-11321 (1131) <sup>a, 1</sup> | 10009-11130 (1122) <sup>a, 1</sup> |
| <i>trnS<sub>2</sub></i> | +      | TGA       |                                                                                             |                                                                        | 11321-11386 (66)                   | 11130-11191 (62)                   |
| <i>NDI</i>              | -      |           | ATG <sup>a</sup> /GTG <sup>b</sup>                                                          | TAA <sup>1</sup> /T <sup>2</sup> /TA <sup>3</sup><br>/TAG <sup>4</sup> | 11380-12318 (939) <sup>a, 1</sup>  | 11208-12123 (916) <sup>a, 2</sup>  |
| <i>trnL<sub>1</sub></i> | -      | TAG       |                                                                                             |                                                                        | 12320-12383 (64)                   | 12125-12186 (62)                   |
| <i>lrRNA</i>            | -      |           |                                                                                             |                                                                        | 12407-13604 (1198)                 | 12187-13392 (1206)                 |
| <i>trnV</i>             | -      | TAC       |                                                                                             |                                                                        | 13598-13659 (62)                   | 13393-13461 (69)                   |
| <i>srRNA</i>            | -      |           |                                                                                             |                                                                        | 13657-14383 (727)                  | 13462-14228 (767)                  |
| A+T-rich<br>region      |        |           |                                                                                             |                                                                        | 14384-15729 (1346)                 | 14229-15259 (1031)                 |

| Gene                    | Strand | Anticodon | Start codon                                                                                 | Stop codon                                                              | <i>Saccharosydne procerus</i>     | <i>Changeonodelphax velitchkovskyi</i> | <i>Nilaparvata bakeri</i><br>(unknown) | <i>Nilaparvata lugens</i><br>(biotype Y, Zhejiang, China) | <i>Nilaparvata lugens</i><br>(biotype L, Zhejiang, China) |
|-------------------------|--------|-----------|---------------------------------------------------------------------------------------------|-------------------------------------------------------------------------|-----------------------------------|----------------------------------------|----------------------------------------|-----------------------------------------------------------|-----------------------------------------------------------|
| <i>trnI</i>             | +      | GAT       |                                                                                             |                                                                         | 1-65 (65)                         | 1-66 (66)                              | 1-70 (70)                              | 1-69 (69)                                                 | 1-69 (69)                                                 |
| <i>trnQ</i>             | -      | TTG       |                                                                                             |                                                                         | 67-132 (66)                       | 72-137 (66)                            | 74-139 (66)                            | 73-139 (67)                                               | 73-139 (67)                                               |
| <i>trnM</i>             | +      | CAT       |                                                                                             |                                                                         | 132-195 (64)                      | 137-198 (62)                           | 139-202 (64)                           | 139-202 (64)                                              | 139-202 (64)                                              |
| <i>ND2</i>              | +      |           | ATT <sup>a</sup> /ATA <sup>b</sup>                                                          | TAA <sup>1</sup> /TAG <sup>2</sup>                                      | 196-1155 (960) <sup>a,1</sup>     | 199-1152 (954) <sup>a,1</sup>          | 203-1156 (954) <sup>a,1</sup>          | 203-1156 (954) <sup>a,1</sup>                             | 203-1156 (954) <sup>a,1</sup>                             |
| <i>trnC</i>             | -      | GCA       |                                                                                             |                                                                         | 1154-1214 (61)                    | 1156-1218 (63)                         | 1157-1218 (62)                         | 1157-1219 (63)                                            | 1157-1219 (63)                                            |
| <i>trnW</i>             | +      | TCA       |                                                                                             |                                                                         | 1223-1287 (65)                    | 1247-1311 (65)                         | 1231-1286 (56)                         | 1228-1283 (56)                                            | 1227-1282 (56)                                            |
| <i>trnY</i>             | -      | GTA       |                                                                                             |                                                                         | 1302-1362 (61)                    | 1327-1386 (60)                         | 1307-1369 (63)                         | 1304-1366 (63)                                            | 1303-1365 (63)                                            |
| <i>COI</i>              | +      |           | ATC <sup>a</sup> /ATG <sup>b</sup> /ATA <sup>c</sup> /CTG <sup>d</sup>                      | TAA <sup>1</sup> /T <sup>2</sup>                                        | 1368-2901 (1534) <sup>b,2</sup>   | 1395-2928 (1534) <sup>b,2</sup>        | 1384-2922 (1539) <sup>b,1</sup>        | 1380-2918 (1539) <sup>b,1</sup>                           | 1379-2917 (1539) <sup>b,1</sup>                           |
| <i>trnL<sub>2</sub></i> | +      | TAA       |                                                                                             |                                                                         | 2902-2965 (64)                    | 2929-2994 (66)                         | 2918-2983 (66)                         | 2914-2979 (66)                                            | 2913-2978 (66)                                            |
| <i>COII</i>             | +      |           | ATA <sup>a</sup> /ATG <sup>b</sup> /ATT <sup>c</sup>                                        | TAA <sup>1</sup> /T <sup>2</sup> /TAG <sup>3</sup>                      | 2966-3631 (666) <sup>c,1</sup>    | 2995-3657 (663) <sup>c,1</sup>         | 2984-3646 (663) <sup>c,1</sup>         | 2980-3642 (663) <sup>c,1</sup>                            | 2979-3641 (663) <sup>c,1</sup>                            |
| <i>trnK</i>             | +      | CTT       |                                                                                             |                                                                         | 3634-3703 (70)                    | 3661-3731 (71)                         | 3653-3722 (70)                         | 3654-3724 (71)                                            | 3653-3723 (71)                                            |
| <i>trnD</i>             | +      | GTC       |                                                                                             |                                                                         | 3704-3763 (60)                    | 3733-3794 (62)                         | 3723-3786 (64)                         | 3725-3788 (64)                                            | 3724-3787 (64)                                            |
| <i>ATP8</i>             | +      |           | ATT <sup>a</sup> /ATA <sup>b</sup> /ATC <sup>c</sup>                                        | TAA <sup>1</sup> /TAG <sup>2</sup>                                      | 3764-3865 (102) <sup>a,1</sup>    | 3795-3896 (102) <sup>a,1</sup>         | 3787-3888 (102) <sup>b,1</sup>         | 3789-3887 (99) <sup>a,1</sup>                             | 3788-3886 (99) <sup>a,1</sup>                             |
| <i>ATP6</i>             | +      |           | ATG <sup>a</sup> /ATA <sup>b</sup> /ATT <sup>c</sup>                                        | T <sup>1</sup> /TAG <sup>2</sup>                                        | 3859-4513 (655) <sup>a,1</sup>    | 3890-4544 (655) <sup>b,1</sup>         | 3867-4518 (652) <sup>c,1</sup>         | 3869-4520 (652) <sup>c,1</sup>                            | 3868-4519 (652) <sup>c,1</sup>                            |
| <i>COIII</i>            | +      |           | ATG <sup>a</sup> /ATT <sup>b</sup>                                                          | TAG <sup>1</sup> /T <sup>2</sup> /TAA <sup>3</sup>                      | 4514-5294 (781) <sup>a,2</sup>    | 4545-5325 (781) <sup>a,2</sup>         | 4519-5314 (796) <sup>b,2</sup>         | 4521-5316 (796) <sup>b,2</sup>                            | 4520-5315 (796) <sup>b,2</sup>                            |
| <i>trnG</i>             | +      | TCC       |                                                                                             |                                                                         | 5295-5355 (61)                    | 5326-5386 (61)                         | 5315-5376 (62)                         | 5317-5378 (62)                                            | 5316-5377 (62)                                            |
| <i>ND3</i>              | +      |           | ATG <sup>a</sup> /ATT <sup>b</sup> /ATC <sup>c</sup><br>/ATA <sup>d</sup>                   | TAA <sup>1</sup> /TA <sup>2</sup> /TAG <sup>3</sup><br>/T <sup>4</sup>  | 5356-5706 (351) <sup>b,1</sup>    | 5387-5737 (351) <sup>b,3</sup>         | 5478-5723 (246) <sup>c,1</sup>         | 5480-5725 (246) <sup>c,1</sup>                            | 5479-5724 (246) <sup>c,1</sup>                            |
| <i>trnA</i>             | +      | TGC       |                                                                                             |                                                                         | 5712-5774 (63)                    | 5736-5796 (61)                         | 5732-5792 (61)                         | 5731-5791 (61)                                            | 5730-5790 (61)                                            |
| <i>trnR</i>             | +      | TCG       |                                                                                             |                                                                         | 5775-5833 (59)                    | 5801-5861 (61)                         | 5797-5858 (62)                         | 5796-5855 (60)                                            | 5795-5854 (60)                                            |
| <i>trnN</i>             | +      | GTT       |                                                                                             |                                                                         | 5835-5897 (63)                    | 5865-5929 (65)                         | 5858-5921 (64)                         | 5855-5918 (64)                                            | 5854-5917 (64)                                            |
| <i>trnS<sub>I</sub></i> | +      | GCT       |                                                                                             |                                                                         | 5897-5954 (58)                    | 5929-5987 (59)                         | 5921-5980 (60)                         | 5918-5976 (59)                                            | 5917-5975 (59)                                            |
| <i>trnE</i>             | +      | TTC       |                                                                                             |                                                                         | 5954-6015 (62)                    | 5987-6046 (60)                         | 5980-6042 (63)                         | 5976-6039 (64)                                            | 5975-6039 (65)                                            |
| <i>trnF</i>             | -      | GAA       |                                                                                             |                                                                         | 6020-6086 (67)                    | 6047-6110 (64)                         | 6043-6108 (66)                         | 6040-6105 (66)                                            | 6040-6105 (66)                                            |
| <i>ND5</i>              | -      |           | ATG <sup>a</sup> /ATT <sup>b</sup> /TTG <sup>c</sup><br>/ATA <sup>d</sup> /GTG <sup>e</sup> | TAA <sup>1</sup> /TAG <sup>2</sup> /T <sup>3</sup>                      | 6087-7758 (1672) <sup>a,3</sup>   | 6111-7782 (1672) <sup>c,3</sup>        | 6109-7783 (1675) <sup>a,3</sup>        | 6106-7780 (1675) <sup>a,3</sup>                           | 6106-7780 (1675) <sup>a,3</sup>                           |
| <i>trnH</i>             | -      | GTG       |                                                                                             |                                                                         | 7759-7822 (64)                    | 7783-7842 (60)                         | 7783-7842 (60)                         | 7780-7840 (61)                                            | 7780-7840 (61)                                            |
| <i>ND4</i>              | -      |           | ATG <sup>a</sup> /ATT <sup>b</sup> /ATA <sup>c</sup>                                        | TAG <sup>1</sup> /T <sup>2</sup> /TAA <sup>3</sup> /T<br>A <sup>4</sup> | 7826-9142 (1317) <sup>a,3</sup>   | 7843-9160 (1318) <sup>a,2</sup>        | 7843-9162 (1320) <sup>b,3</sup>        | 7841-9160 (1320) <sup>b,3</sup>                           | 7841-9160 (1320) <sup>b,3</sup>                           |
| <i>ND4L</i>             | -      |           | ATG <sup>a</sup> /ATT <sup>b</sup>                                                          | TAA <sup>1</sup> /TAG <sup>2</sup>                                      | 9136-9408 (273) <sup>a,2</sup>    | 9154-9426 (273) <sup>a,1</sup>         | 9153-9422 (270) <sup>a,1</sup>         | 9151-9420 (270) <sup>a,1</sup>                            | 9151-9420 (270) <sup>a,1</sup>                            |
| <i>ND6</i>              | +      |           | ATA <sup>a</sup> /ATT <sup>b</sup> /ATC <sup>c</sup>                                        | TAA <sup>1</sup> /T <sup>2</sup>                                        | 9458-9964 (507) <sup>a,1</sup>    | 9472-9996 (525) <sup>b,1</sup>         | 9457-9996 (540) <sup>b,1</sup>         | 9454-9993 (540) <sup>b,1</sup>                            | 9454-9993 (540) <sup>b,1</sup>                            |
| <i>trnP</i>             | -      | TGG       |                                                                                             |                                                                         | 10029-10092 (64)                  | 10143-10205 (63)                       | 10067-10128 (62)                       | 10042-10103 (62)                                          | 10042-10103 (62)                                          |
| <i>trnT</i>             | +      | TGT       |                                                                                             |                                                                         | 10094-10157 (64)                  | 10206-10267 (62)                       | 10129-10194 (66)                       | 10104-10165 (62)                                          | 10104-10166 (63)                                          |
| <i>CytB</i>             | +      |           | ATG <sup>a</sup> /ATA <sup>b</sup>                                                          | TAA <sup>1</sup> /TAG <sup>2</sup> /T <sup>3</sup>                      | 10162-11262 (1101) <sup>a,1</sup> | 10273-11376 (1104) <sup>a,1</sup>      | 10203-11306 (1104) <sup>a,2</sup>      | 10173-11276 (1104) <sup>a,2</sup>                         | 10174-11277 (1104) <sup>a,2</sup>                         |
| <i>trnS<sub>2</sub></i> | +      | TGA       |                                                                                             |                                                                         | 11264-11325 (62)                  | 11379-11436 (58)                       | 11297-11358 (62)                       | 11267-11328 (62)                                          | 11268-11329 (62)                                          |
| <i>NDI</i>              | -      |           | ATG <sup>a</sup> /GTG <sup>b</sup>                                                          | TAA <sup>1</sup> /T <sup>2</sup> /TA <sup>3</sup><br>/TAG <sup>4</sup>  | 11341-12256 (916) <sup>a,2</sup>  | 11654-12571 (918) <sup>a,1</sup>       | 11379-12296 (918) <sup>a,4</sup>       | 11349-12266 (918) <sup>a,4</sup>                          | 11350-12267 (918) <sup>a,4</sup>                          |
| <i>trnL<sub>I</sub></i> | -      | TAG       |                                                                                             |                                                                         | 12258-12328 (71)                  | 12573-12634 (62)                       | 12298-12359 (62)                       | 12268-12329 (62)                                          | 12269-12330 (62)                                          |
| <i>lrRNA</i>            | -      |           |                                                                                             |                                                                         | 12329-13545 (1217)                | 12635-13847 (1213)                     | 12360-13574 (1215)                     | 12330-13548 (1219)                                        | 12331-13549 (1219)                                        |
| <i>trnV</i>             | -      | TAC       |                                                                                             |                                                                         | 13546-13615 (70)                  | 13848-13916 (69)                       | 13575-13636 (62)                       | 13549-13610 (62)                                          | 13550-13611 (62)                                          |
| <i>srRNA</i>            | -      |           |                                                                                             |                                                                         | 13616-14369 (754)                 | 13917-14668 (752)                      | 13641-14394 (754)                      | 13615-14365 (751)                                         | 13616-14366 (751)                                         |
| A+T-rich region         |        |           |                                                                                             |                                                                         | 14370-16031 (1662)                | 14669-16449 (1781)                     | -                                      | -                                                         | -                                                         |

| Gene                    | Strand | Anticodon | Start codon                                                                                 | Stop codon                                                             | <i>Nilaparvata lugens</i><br>(Hainan, China)      | <i>Nilaparvata lugens</i><br>(Hadong-gun, Korea) <sup>‡</sup> | <i>Nilaparvata lugens</i><br>(Guangdong, China)   | <i>Nilaparvata lugens</i><br>(biotype 1, Zhejiang,<br>China) | <i>Nilaparvata lugens</i><br>(biotype 2, Zhejiang,<br>China) |
|-------------------------|--------|-----------|---------------------------------------------------------------------------------------------|------------------------------------------------------------------------|---------------------------------------------------|---------------------------------------------------------------|---------------------------------------------------|--------------------------------------------------------------|--------------------------------------------------------------|
| <i>trnI</i>             | +      | GAT       |                                                                                             |                                                                        | 1-69 (69)                                         | 1-65 (65)                                                     | 1-69 (69)                                         | 1-69 (69)                                                    | 1-69 (69)                                                    |
| <i>trnQ</i>             | -      | TTG       |                                                                                             |                                                                        | 73-139 (67)                                       | 63-131 (69)                                                   | 73-139 (67)                                       | 73-139 (67)                                                  | 73-139 (67)                                                  |
| <i>trnM</i>             | +      | CAT       |                                                                                             |                                                                        | 139-202 (64)                                      | 131-199 (69)                                                  | 139-202 (64)                                      | 139-202 (64)                                                 | 139-202 (64)                                                 |
| <i>ND2</i>              | +      |           | ATT <sup>a</sup> /ATA <sup>b</sup>                                                          | TAA <sup>1</sup> /TAG <sup>2</sup>                                     | 203-1156 (954) <sup>a, 1</sup>                    | 200-1213 (1014) <sup>a, 1</sup>                               | 203-1156 (954) <sup>a, 1</sup>                    | 203-1156 (954) <sup>a, 1</sup>                               | 203-1156 (954) <sup>a, 1</sup>                               |
| <i>trnC</i>             | -      | GCA       |                                                                                             |                                                                        | 1157-1219 (63), 1568-1630<br>(63), 1979-2041 (63) | 1157-1219 (63), 1569-1631<br>(63), 1978-2040 (63)             | 1157-1219 (63), 1565-1627<br>(63), 1974-2036 (63) | 1157-1219 (63)                                               | 1157-1219 (63)                                               |
| <i>trnW</i>             | +      | TCA       |                                                                                             |                                                                        | 2052-2116 (65)                                    | 2052-2116 (65)                                                | 2047-2111 (65)                                    | 1228-1283 (56)                                               | 1228-1283 (56)                                               |
| <i>trnY</i>             | -      | GTA       |                                                                                             |                                                                        | 2126-2188 (63)                                    | 2125-2187 (63)                                                | 2121-2183 (63)                                    | 1304-1366 (63)                                               | 1304-1366 (63)                                               |
| <i>COI</i>              | +      |           | ATC <sup>a</sup> /ATG <sup>b</sup> /ATA <sup>c</sup> /CTG <sup>d</sup>                      | TAA <sup>1</sup> /T <sup>2</sup>                                       | 2202-3735 (1534) <sup>b, 2</sup>                  | 2201-3734 (1534) <sup>b, 2</sup>                              | 2197-3730 (1534) <sup>b, 2</sup>                  | 1380-2918 (1539) <sup>b, 1</sup>                             | 1380-2918 (1539) <sup>b, 1</sup>                             |
| <i>trnL<sub>2</sub></i> | +      | TAA       |                                                                                             |                                                                        | 3736-3801 (66)                                    | 3735-3800 (66)                                                | 3731-3796 (66)                                    | 2914-2979 (66)                                               | 2914-2979 (66)                                               |
| <i>COII</i>             | +      |           | ATA <sup>a</sup> /ATG <sup>b</sup> /ATT <sup>c</sup>                                        | TAA <sup>1</sup> /T <sup>2</sup> /TAG <sup>3</sup>                     | 3802-4464 (663) <sup>c, 1</sup>                   | 3801-4463 (663) <sup>c, 1</sup>                               | 3797-4459 (663) <sup>c, 1</sup>                   | 2980-3642 (663) <sup>c, 1</sup>                              | 2980-3642 (663) <sup>c, 1</sup>                              |
| <i>trnK</i>             | +      | CTT       |                                                                                             |                                                                        | 4476-4546 (71)                                    | 4475-4545 (71)                                                | 4471-4541 (71)                                    | 3654-3724 (71)                                               | 3654-3724 (71)                                               |
| <i>trnD</i>             | +      | GTC       |                                                                                             |                                                                        | 4547-4610 (64)                                    | 4546-4609 (64)                                                | 4542-4605 (64)                                    | 3725-3788 (64)                                               | 3725-3788 (64)                                               |
| <i>ATP8</i>             | +      |           | ATT <sup>a</sup> /ATA <sup>b</sup> /ATC <sup>c</sup>                                        | TAA <sup>1</sup> /TAG <sup>2</sup>                                     | 4611-4709 (99) <sup>a, 1</sup>                    | 4610-4708 (99) <sup>a, 1</sup>                                | 4606-4704 (99) <sup>a, 1</sup>                    | 3789-3887 (99) <sup>a, 1</sup>                               | 3789-3887 (99) <sup>a, 1</sup>                               |
| <i>ATP6</i>             | +      |           | ATG <sup>a</sup> /ATA <sup>b</sup> /ATT <sup>c</sup>                                        | T <sup>1</sup> /TAG <sup>2</sup>                                       | 4709-5360 (652) <sup>b, 1</sup>                   | 4708-5359 (652) <sup>b, 1</sup>                               | 4704-5355 (652) <sup>b, 1</sup>                   | 3869-4520 (652) <sup>c, 1</sup>                              | 3869-4520 (652) <sup>c, 1</sup>                              |
| <i>COIII</i>            | +      |           | ATG <sup>a</sup> /ATT <sup>b</sup>                                                          | TAG <sup>1</sup> /T <sup>2</sup> /TAA <sup>3</sup>                     | 5361-6138 (778) <sup>a, 2</sup>                   | 5360-6137 (778) <sup>a, 2</sup>                               | 5356-6133 (778) <sup>a, 2</sup>                   | 4521-5316 (796) <sup>b, 2</sup>                              | 4521-5316 (796) <sup>b, 2</sup>                              |
| <i>trnG</i>             | +      | TCC       |                                                                                             |                                                                        | 6139-6200 (62)                                    | 6138-6199 (62)                                                | 6134-6195 (62)                                    | 5317-5378 (62)                                               | 5317-5378 (62)                                               |
| <i>ND3</i>              | +      |           | ATG <sup>a</sup> /ATT <sup>b</sup> /ATC <sup>c</sup><br>/ATA <sup>d</sup>                   | TAA <sup>1</sup> /TA <sup>2</sup> /TAG <sup>3</sup><br>/T <sup>4</sup> | 6201-6551 (351) <sup>d, 1</sup>                   | 6200-6550 (351) <sup>d, 1</sup>                               | 6196-6546 (351) <sup>d, 1</sup>                   | 5480-5725 (246) <sup>c, 1</sup>                              | 5480-5725 (246) <sup>c, 1</sup>                              |
| <i>trnA</i>             | +      | TGC       |                                                                                             |                                                                        | 6553-6613 (61)                                    | 6552-6612 (61)                                                | 6548-6608 (61)                                    | 5731-5791 (61)                                               | 5731-5791 (61)                                               |
| <i>trnR</i>             | +      | TCG       |                                                                                             |                                                                        | 6618-6677 (60)                                    | 6617-6676 (60)                                                | 6613-6672 (60)                                    | 5796-5855 (60)                                               | 5796-5855 (60)                                               |
| <i>trnN</i>             | +      | GTT       |                                                                                             |                                                                        | 6677-6740 (64)                                    | 6676-6739 (64)                                                | 6672-6735 (64)                                    | 5855-5918 (64)                                               | 5855-5918 (64)                                               |
| <i>trnS<sub>1</sub></i> | +      | GCT       |                                                                                             |                                                                        | 6741-6797 (57)                                    | 6740-6796 (57)                                                | 6736-6792 (57)                                    | 5918-5976 (59)                                               | 5918-5976 (59)                                               |
| <i>trnE</i>             | +      | TTC       |                                                                                             |                                                                        | 6798-6862 (65)                                    | 6797-6862 (66)                                                | 6793-6858 (66)                                    | 5976-6039 (64)                                               | 5976-6040 (65)                                               |
| <i>trnF</i>             | -      | GAA       |                                                                                             |                                                                        | 6863-6928 (66)                                    | 6863-6928 (66)                                                | 6859-6924 (66)                                    | 6040-6105 (66)                                               | 6041-6106 (66)                                               |
| <i>ND5</i>              | -      |           | ATG <sup>a</sup> /ATT <sup>b</sup> /TTG <sup>c</sup><br>/ATA <sup>d</sup> /GTG <sup>e</sup> | TAA <sup>1</sup> /TAG <sup>2</sup> /T <sup>3</sup>                     | 6929-8603 (1675) <sup>a, 3</sup>                  | 6929-8603 (1675) <sup>a, 3</sup>                              | 6925-8599 (1675) <sup>a, 3</sup>                  | 6106-7783 (1678) <sup>d, 3</sup>                             | 6107-7784 (1678) <sup>d, 3</sup>                             |
| <i>trnH</i>             | -      | GTG       |                                                                                             |                                                                        | 8604-8664 (61)                                    | 8604-8664 (61)                                                | 8600-8660 (61)                                    | 7780-7840 (61)                                               | 7781-7841 (61)                                               |
| <i>ND4</i>              | -      |           | ATG <sup>a</sup> /ATT <sup>b</sup> /ATA <sup>c</sup>                                        | TAG <sup>1</sup> /T <sup>2</sup> /TAA <sup>3</sup> /TA <sup>4</sup>    | 8665-9980 (1316) <sup>a, 4</sup>                  | 8665-9980 (1316) <sup>a, 4</sup>                              | 8660-9976 (1317) <sup>a, 3</sup>                  | 7841-9160 (1320) <sup>b, 3</sup>                             | 7842-9161 (1320) <sup>b, 3</sup>                             |
| <i>ND4L</i>             | -      |           | ATG <sup>a</sup> /ATT <sup>b</sup>                                                          | TAA <sup>1</sup> /TAG <sup>2</sup>                                     | 9974-10243 (270) <sup>a, 1</sup>                  | 9974-10243 (270) <sup>a, 1</sup>                              | 9970-10239 (270) <sup>a, 1</sup>                  | 9151-9420 (270) <sup>a, 1</sup>                              | 9152-9421 (270) <sup>a, 1</sup>                              |
| <i>ND6</i>              | +      |           | ATA <sup>a</sup> /ATT <sup>b</sup> /ATC <sup>c</sup>                                        | TAA <sup>1</sup> /T <sup>2</sup>                                       | 10277-10816 (540) <sup>b, 1</sup>                 | 10277-10816 (9790) <sup>b, 1</sup>                            | 10273-10812 (9786) <sup>b, 1</sup>                | 9454-9993 (540) <sup>b, 1</sup>                              | 9455-9994 (540) <sup>b, 1</sup>                              |
| <i>trnP</i>             | -      | TGG       |                                                                                             |                                                                        | 10865-10926 (62)                                  | 10865-10926 (62)                                              | 10861-10922 (62)                                  | 10041-10102 (62)                                             | 10043-10104 (62)                                             |
| <i>trnT</i>             | +      | TGT       |                                                                                             |                                                                        | 10927-10990 (64)                                  | 10927-10988 (62)                                              | 10923-10985 (63)                                  | 10103-10164 (62)                                             | 10105-10167 (63)                                             |
| <i>CytB</i>             | +      |           | ATG <sup>a</sup> /ATA <sup>b</sup>                                                          | TAA <sup>1</sup> /TAG <sup>2</sup> /T <sup>3</sup>                     | 10998-12101 (1104) <sup>a, 2</sup>                | 10996-12099 (1104) <sup>a, 2</sup>                            | 10993-12096 (1104) <sup>a, 2</sup>                | 10172-11275 (1104) <sup>a, 2</sup>                           | 10175-11278 (1104) <sup>a, 2</sup>                           |
| <i>trnS<sub>2</sub></i> | +      | TGA       |                                                                                             |                                                                        | 12092-12153 (62)                                  | 12090-12151 (62)                                              | 12087-12148 (62)                                  | 11266-11327 (62)                                             | 11269-11330 (62)                                             |
| <i>ND1</i>              | -      |           | ATG <sup>a</sup> /GTG <sup>b</sup>                                                          | TAA <sup>1</sup> /T <sup>2</sup> /TA <sup>3</sup><br>/TAG <sup>4</sup> | 12174-13091 (918) <sup>a, 4</sup>                 | 12137-13087 (951) <sup>a, 1</sup>                             | 12169-13083 (915) <sup>a, 4</sup>                 | 11348-12265 (918) <sup>a, 4</sup>                            | 11351-12268 (918) <sup>a, 4</sup>                            |
| <i>trnL<sub>1</sub></i> | -      | TAG       |                                                                                             |                                                                        | 13093-13154 (62)                                  | 13089-13150 (62)                                              | 13085-13146 (62)                                  | 12267-12328 (62)                                             | 12270-12331 (62)                                             |
| <i>lrRNA</i>            | -      |           |                                                                                             |                                                                        | 13155-14373 (1219)                                | 13151-14369 (1219)                                            | 13147-14365 (1219)                                | 12329-13547 (1219)                                           | 12332-13550 (1219)                                           |
| <i>trnV</i>             | -      | TAC       |                                                                                             |                                                                        | 14373-14443 (71)                                  | 14369-14439 (71)                                              | 14365-14435 (71)                                  | 13548-13609 (62)                                             | 13551-13612 (62)                                             |
| <i>srRNA</i>            | -      |           |                                                                                             |                                                                        | 14443-15190 (748)                                 | 14439-15186 (748)                                             | 14435-15182 (748)                                 | 13614-14364 (751)                                            | 13617-14367 (751)                                            |
| A+T-rich<br>region      |        |           |                                                                                             |                                                                        | 15191-17619 (2429)                                | 15187-17610 (2424)                                            | 15183-17606 (2424)                                | -                                                            | -                                                            |

| Gene                    | Strand | Anticodon | Start codon                                                                                 | Stop codon                                                             | <i>Nilaparvata lugens</i><br>(biotype 3, Zhejiang,<br>China) | <i>Nilaparvata mui</i>            | <i>Nilaparvata</i> sp. <sup>‡</sup> | <i>Peregrinus maidis</i>          | <i>Sogatella furcifera</i><br>(Hainan, China) |
|-------------------------|--------|-----------|---------------------------------------------------------------------------------------------|------------------------------------------------------------------------|--------------------------------------------------------------|-----------------------------------|-------------------------------------|-----------------------------------|-----------------------------------------------|
| <i>trnI</i>             | +      | GAT       |                                                                                             |                                                                        | 1-69 (69)                                                    | 1-70 (70)                         | 1-67 (67)                           | 1-66 (66)                         | 1-66 (66)                                     |
| <i>trnQ</i>             | -      | TTG       |                                                                                             |                                                                        | 73-139 (67)                                                  | 73-138 (66)                       | 84-149 (66)                         | 83-148 (66)                       | 69-134 (66)                                   |
| <i>trnM</i>             | +      | CAT       |                                                                                             |                                                                        | 139-202 (64)                                                 | 138-200 (63)                      | 149-213 (65)                        | 148-209 (62)                      | 134-195 (62)                                  |
| <i>ND2</i>              | +      |           | ATT <sup>a</sup> /ATA <sup>b</sup>                                                          | TAA <sup>1</sup> /TAG <sup>2</sup>                                     | 203-1156 (954) <sup>a,1</sup>                                | 201-1154 (954) <sup>a,1</sup>     | 214-1170 (957) <sup>a,2</sup>       | 210-1166 (957) <sup>a,1</sup>     | 196-1152 (957) <sup>a,1</sup>                 |
| <i>trnC</i>             | -      | GCA       |                                                                                             |                                                                        | 1157-1219 (63)                                               | 1155-1216 (62)                    | 1169-1229 (61)                      | 1165-1225 (61)                    | 1151-1215 (65)                                |
| <i>trnW</i>             | +      | TCA       |                                                                                             |                                                                        | 1228-1283 (56)                                               | 1224-1281 (58)                    | 1249-1314 (66)                      | 1266-1331 (66)                    | 1234-1300 (67)                                |
| <i>trnY</i>             | -      | GTA       |                                                                                             |                                                                        | 1304-1366 (63)                                               | 1302-1364 (63)                    | 1318-1378 (61)                      | 1333-1394 (62)                    | 1311-1373 (63)                                |
| <i>COI</i>              | +      |           | ATC <sup>a</sup> /ATG <sup>b</sup> /ATA <sup>c</sup> /CTG <sup>d</sup>                      | TAA <sup>1</sup> /T <sup>2</sup>                                       | 1380-2918 (1539) <sup>b,1</sup>                              | 1379-2917 (1539) <sup>b,1</sup>   | 1388-2921 (1534) <sup>b,2</sup>     | 1403-2936 (1534) <sup>b,2</sup>   | 1375-2908 (1534) <sup>b,2</sup>               |
| <i>trnL<sub>2</sub></i> | +      | TAA       |                                                                                             |                                                                        | 2914-2979 (66)                                               | 2913-2978 (66)                    | 2922-2986 (65)                      | 2937-3001 (65)                    | 2909-2973 (65)                                |
| <i>COII</i>             | +      |           | ATA <sup>a</sup> /ATG <sup>b</sup> /ATT <sup>c</sup>                                        | TAA <sup>1</sup> /T <sup>2</sup> /TAG <sup>3</sup>                     | 2980-3642 (663) <sup>c,1</sup>                               | 2979-3641 (663) <sup>c,1</sup>    | 2987-3649 (663) <sup>a,1</sup>      | 3002-3664 (663) <sup>a,1</sup>    | 2974-3637 (664) <sup>c,2</sup>                |
| <i>trnK</i>             | +      | CTT       |                                                                                             |                                                                        | 3654-3724 (71)                                               | 3648-3717 (70)                    | 3651-3722 (72)                      | 3666-3736 (71)                    | 3638-3708 (71)                                |
| <i>trnD</i>             | +      | GTC       |                                                                                             |                                                                        | 3725-3788 (64)                                               | 3718-3781 (64)                    | 3723-3784 (62)                      | 3737-3801 (65)                    | 3709-3768 (60)                                |
| <i>ATP8</i>             | +      |           | ATT <sup>a</sup> /ATA <sup>b</sup> /ATC <sup>c</sup>                                        | TAA <sup>1</sup> /TAG <sup>2</sup>                                     | 3789-3887 (99) <sup>a,1</sup>                                | 3782-3880 (99) <sup>c,1</sup>     | 3786-3887 (102) <sup>b,1</sup>      | 3802-3900 (99) <sup>b,1</sup>     | 3771-3872 (102) <sup>a,1</sup>                |
| <i>ATP6</i>             | +      |           | ATG <sup>a</sup> /ATA <sup>b</sup> /ATT <sup>c</sup>                                        | T <sup>1</sup> /TAG <sup>2</sup>                                       | 3869-4520 (652) <sup>c,1</sup>                               | 3862-4513 (652) <sup>c,1</sup>    | 3881-4535 (655) <sup>c,1</sup>      | 3897-4551 (655) <sup>b,1</sup>    | 3866-4520 (655) <sup>a,1</sup>                |
| <i>COIII</i>            | +      |           | ATG <sup>a</sup> /ATT <sup>b</sup>                                                          | TAG <sup>1</sup> /T <sup>2</sup> /TAA <sup>3</sup>                     | 4521-5316 (796) <sup>b,2</sup>                               | 4514-5309 (796) <sup>b,2</sup>    | 4536-5316 (781) <sup>a,2</sup>      | 4552-5332 (781) <sup>a,2</sup>    | 4521-5301 (781) <sup>a,2</sup>                |
| <i>trnG</i>             | +      | TCC       |                                                                                             |                                                                        | 5317-5378 (62)                                               | 5310-5371 (62)                    | 5318-5376 (59)                      | 5333-5392 (60)                    | 5302-5363 (62)                                |
| <i>ND3</i>              | +      |           | ATG <sup>a</sup> /ATT <sup>b</sup> /ATC <sup>c</sup><br>/ATA <sup>d</sup>                   | TAA <sup>1</sup> /TA <sup>2</sup> /TAG <sup>3</sup><br>/T <sup>4</sup> | 5480-5725 (246) <sup>c,1</sup>                               | 5473-5718 (246) <sup>c,1</sup>    | 5377-5727 (351) <sup>d,3</sup>      | 5393-5743 (351) <sup>b,1</sup>    | 5364-5712 (349) <sup>b,4</sup>                |
| <i>trnA</i>             | +      | TGC       |                                                                                             |                                                                        | 5731-5791 (61)                                               | 5726-5786 (61)                    | 5726-5788 (63)                      | 5745-5805 (61)                    | 5713-5773 (61)                                |
| <i>trnR</i>             | +      | TCG       |                                                                                             |                                                                        | 5796-5855 (60)                                               | 5791-5850 (60)                    | 5793-5853 (61)                      | 5810-5870 (61)                    | 5778-5838 (61)                                |
| <i>trnN</i>             | +      | GTT       |                                                                                             |                                                                        | 5855-5918 (64)                                               | 5850-5913 (64)                    | 5853-5916 (64)                      | 5870-5933 (64)                    | 5838-5900 (63)                                |
| <i>trnS<sub>I</sub></i> | +      | GCT       |                                                                                             |                                                                        | 5918-5976 (59)                                               | 5913-5972 (60)                    | 5917-5975 (59)                      | 5933-5992 (60)                    | 5901-5954 (54)                                |
| <i>trnE</i>             | +      | TTC       |                                                                                             |                                                                        | 5976-6040 (65)                                               | 5972-6037 (66)                    | 5975-6039 (65)                      | 5992-6054 (63)                    | 5955-6017 (63)                                |
| <i>trnF</i>             | -      | GAA       |                                                                                             |                                                                        | 6041-6106 (66)                                               | 6038-6103 (66)                    | 6041-6103 (63)                      | 6054-6116 (63)                    | 6018-6085 (68)                                |
| <i>ND5</i>              | -      |           | ATG <sup>a</sup> /ATT <sup>b</sup> /TTG <sup>c</sup><br>/ATA <sup>d</sup> /GTG <sup>e</sup> | TAA <sup>1</sup> /TAG <sup>2</sup> /T <sup>3</sup>                     | 6107-7784 (1678) <sup>d,3</sup>                              | 6104-7781 (1678) <sup>d,3</sup>   | 6103-7785 (1683) <sup>d,1</sup>     | 6117-7797 (1681) <sup>d,3</sup>   | 6086-7760 (1675) <sup>c,3</sup>               |
| <i>trnH</i>             | -      | GTG       |                                                                                             |                                                                        | 7782-7842 (61)                                               | 7779-7839 (61)                    | 7788-7843 (56)                      | 7800-7854 (55)                    | 7761-7820 (60)                                |
| <i>ND4</i>              | -      |           | ATG <sup>a</sup> /ATT <sup>b</sup> /ATA <sup>c</sup>                                        | TAG <sup>1</sup> /T <sup>2</sup> /TAA <sup>3</sup> /TA <sup>4</sup>    | 7842-9161 (1320) <sup>b,3</sup>                              | 7839-9158 (1320) <sup>b,3</sup>   | 7845-9143 (1299) <sup>c,3</sup>     | 7856-9172 (1317) <sup>a,3</sup>   | 7821-9143 (1323) <sup>a,3</sup>               |
| <i>ND4L</i>             | -      |           | ATG <sup>a</sup> /ATT <sup>b</sup>                                                          | TAA <sup>1</sup> /TAG <sup>2</sup>                                     | 9152-9421 (270) <sup>a,1</sup>                               | 9149-9418 (270) <sup>a,1</sup>    | 9155-9427 (273) <sup>a,1</sup>      | 9166-9438 (273) <sup>a,2</sup>    | 9137-9409 (273) <sup>a,1</sup>                |
| <i>ND6</i>              | +      |           | ATA <sup>a</sup> /ATT <sup>b</sup> /ATC <sup>c</sup>                                        | TAA <sup>1</sup> /T <sup>2</sup>                                       | 9455-9994 (540) <sup>b,1</sup>                               | 9453-9992 (540) <sup>b,1</sup>    | 9467-10006 (540) <sup>a,1</sup>     | 9492-10010 (519) <sup>a,1</sup>   | 9459-9968 (510) <sup>b,1</sup>                |
| <i>trnP</i>             | -      | TGG       |                                                                                             |                                                                        | 10043-10104 (62)                                             | 10048-10109 (62)                  | 10226-10287 (62)                    | 10349-10410 (62)                  | 10062-10123 (62)                              |
| <i>trnT</i>             | +      | TGT       |                                                                                             |                                                                        | 10105-10167 (63)                                             | 10110-10170 (61)                  | 10289-10351 (63)                    | 10412-10475 (64)                  | 10127-10189 (63)                              |
| <i>CytB</i>             | +      |           | ATG <sup>a</sup> /ATA <sup>b</sup>                                                          | TAA <sup>1</sup> /TAG <sup>2</sup> /T <sup>3</sup>                     | 10175-11278 (1104) <sup>a,2</sup>                            | 10181-11284 (1104) <sup>a,2</sup> | 10356-11459 (1104) <sup>a,1</sup>   | 10480-11583 (1104) <sup>a,1</sup> | 10194-11295 (1102) <sup>a,3</sup>             |
| <i>trnS<sub>2</sub></i> | +      | TGA       |                                                                                             |                                                                        | 11269-11330 (62)                                             | 11273-11334 (62)                  | 11459-11516 (58)                    | 11583-11638 (56)                  | 11296-11351 (56)                              |
| <i>NDI</i>              | -      |           | ATG <sup>a</sup> /GTG <sup>b</sup>                                                          | TAA <sup>1</sup> /T <sup>2</sup> /TA <sup>3</sup><br>/TAG <sup>4</sup> | 11351-12268 (918) <sup>a,4</sup>                             | 11357-12274 (918) <sup>a,4</sup>  | 11534-12451 (918) <sup>a,1</sup>    | 11656-12573 (918) <sup>a,4</sup>  | 11369-12286 (918) <sup>a,4</sup>              |
| <i>trnL<sub>1</sub></i> | -      | TAG       |                                                                                             |                                                                        | 12270-12331 (62)                                             | 12274-12335 (62)                  | 12453-12518 (66)                    | 12575-12640 (66)                  | 12288-12349 (62)                              |
| <i>lrRNA</i>            | -      |           |                                                                                             |                                                                        | 12332-13550 (1219)                                           | 12336-13554 (1219)                | 12519-13730 (1212)                  | 12641-13862 (1222)                | 12350-13573 (1224)                            |
| <i>trnV</i>             | -      | TAC       |                                                                                             |                                                                        | 13551-13612 (62)                                             | 13555-13616 (62)                  | 13731-13801 (71)                    | 13863-13933 (71)                  | 13574-13642 (69)                              |
| <i>srRNA</i>            | -      |           |                                                                                             |                                                                        | 13617-14367 (751)                                            | 13619-14371 (753)                 | 13802-14550 (749)                   | 13934-14683 (750)                 | 13643-14389 (747)                             |
| A+T-rich<br>region      |        |           |                                                                                             |                                                                        | -                                                            | -                                 | 14551-15274 (724)                   | 14684-16279 (1596)                | 14390-16612 (2223)                            |



| Gene                    | Strand | Anticodon | Start codon                                                                                 | Stop codon                                                             | <i>Sogatella furcifera</i><br>(Yunnan, China) | <i>Sogatella vibix</i>            | <i>Laodelphax striatellus</i><br>(Jiangsu, China) | <i>Laodelphax striatella</i><br>(Suwon, Korea) | <i>Laodelphax striatella</i><br>(Milyang, Korea) |
|-------------------------|--------|-----------|---------------------------------------------------------------------------------------------|------------------------------------------------------------------------|-----------------------------------------------|-----------------------------------|---------------------------------------------------|------------------------------------------------|--------------------------------------------------|
| <i>trnI</i>             | +      | GAT       |                                                                                             |                                                                        | 1-66 (66)                                     | 1-68 (68)                         | 1-66 (66)                                         | 1-66 (66)                                      | 1-66 (66)                                        |
| <i>trnQ</i>             | -      | TTG       |                                                                                             |                                                                        | 69-134 (66)                                   | 71-138 (68)                       | 69-134 (66)                                       | 69-134 (66)                                    | 69-134 (66)                                      |
| <i>trnM</i>             | +      | CAT       |                                                                                             |                                                                        | 134-195 (62)                                  | 138-199 (62)                      | 134-198 (65)                                      | 134-198 (65)                                   | 134-198 (65)                                     |
| <i>ND2</i>              | +      |           | ATT <sup>a</sup> /ATA <sup>b</sup>                                                          | TAA <sup>1</sup> /TAG <sup>2</sup>                                     | 196-1152 (957) <sup>a,1</sup>                 | 200-1156 (957) <sup>a,1</sup>     | 199-1155 (957) <sup>a,1</sup>                     | 199-1155 (957) <sup>a,1</sup>                  | 199-1155 (957) <sup>a,1</sup>                    |
| <i>trnC</i>             | -      | GCA       |                                                                                             |                                                                        | 1151-1215 (65)                                | 1155-1219 (65)                    | 1159-1220 (62)                                    | 1159-1220 (62)                                 | 1159-1220 (62)                                   |
| <i>trnW</i>             | +      | TCA       |                                                                                             |                                                                        | 1234-1300 (67)                                | 1236-1300 (65)                    | 1255-1321 (67)                                    | 1255-1321 (67)                                 | 1255-1321 (67)                                   |
| <i>trnY</i>             | -      | GTA       |                                                                                             |                                                                        | 1311-1373 (63)                                | 1310-1371 (62)                    | 1325-1385 (61)                                    | 1325-1385 (61)                                 | 1325-1385 (61)                                   |
| <i>COI</i>              | +      |           | ATC <sup>a</sup> /ATG <sup>b</sup> /ATA <sup>c</sup> /CTG <sup>d</sup>                      | TAA <sup>1</sup> /T <sup>2</sup>                                       | 1375-2908 (1534) <sup>b,2</sup>               | 1373-2906 (1534) <sup>b,2</sup>   | 1390-2923 (1534) <sup>b,2</sup>                   | 1390-2923 (1534) <sup>b,2</sup>                | 1390-2923 (1534) <sup>b,2</sup>                  |
| <i>trnL<sub>2</sub></i> | +      | TAA       |                                                                                             |                                                                        | 2909-2973 (65)                                | 2907-2971 (65)                    | 2924-2989 (66)                                    | 2924-2989 (66)                                 | 2924-2989 (66)                                   |
| <i>COII</i>             | +      |           | ATA <sup>a</sup> /ATG <sup>b</sup> /ATT <sup>c</sup>                                        | TAA <sup>1</sup> /T <sup>2</sup> /TAG <sup>3</sup>                     | 2974-3637 (664) <sup>c,2</sup>                | 2972-3634 (663) <sup>c,3</sup>    | 2990-3652 (663) <sup>c,3</sup>                    | 2990-3652 (663) <sup>c,3</sup>                 | 2990-3652 (663) <sup>c,3</sup>                   |
| <i>trnK</i>             | +      | CTT       |                                                                                             |                                                                        | 3638-3708 (71)                                | 3636-3706 (71)                    | 3653-3723 (71)                                    | 3653-3723 (71)                                 | 3653-3723 (71)                                   |
| <i>trnD</i>             | +      | GTC       |                                                                                             |                                                                        | 3709-3768 (60)                                | 3707-3768 (62)                    | 3724-3785 (62)                                    | 3724-3785 (62)                                 | 3724-3785 (62)                                   |
| <i>ATP8</i>             | +      |           | ATT <sup>a</sup> /ATA <sup>b</sup> /ATC <sup>c</sup>                                        | TAA <sup>1</sup> /TAG <sup>2</sup>                                     | 3771-3872 (102) <sup>a,1</sup>                | 3769-3870 (102) <sup>a,1</sup>    | 3786-3887 (102) <sup>a,2</sup>                    | 3786-3887 (102) <sup>a,1</sup>                 | 3786-3887 (102) <sup>a,1</sup>                   |
| <i>ATP6</i>             | +      |           | ATG <sup>a</sup> /ATA <sup>b</sup> /ATT <sup>c</sup>                                        | T <sup>1</sup> /TAG <sup>2</sup>                                       | 3866-4520 (655) <sup>a,1</sup>                | 3864-4518 (655) <sup>a,1</sup>    | 3881-4535 (655) <sup>a,1</sup>                    | 3881-4535 (655) <sup>a,1</sup>                 | 3881-4535 (655) <sup>a,1</sup>                   |
| <i>COIII</i>            | +      |           | ATG <sup>a</sup> /ATT <sup>b</sup>                                                          | TAG <sup>1</sup> /T <sup>2</sup> /TAA <sup>3</sup>                     | 4521-5301 (781) <sup>a,2</sup>                | 4519-5299 (781) <sup>a,2</sup>    | 4536-5316 (781) <sup>a,2</sup>                    | 4536-5316 (781) <sup>a,2</sup>                 | 4536-5316 (781) <sup>a,2</sup>                   |
| <i>trnG</i>             | +      | TCC       |                                                                                             |                                                                        | 5302-5363 (62)                                | 5300-5359 (60)                    | 5317-5377 (61)                                    | 5317-5377 (61)                                 | 5317-5377 (61)                                   |
| <i>ND3</i>              | +      |           | ATG <sup>a</sup> /ATT <sup>b</sup> /ATC <sup>c</sup><br>/ATA <sup>d</sup>                   | TAA <sup>1</sup> /TA <sup>2</sup> /TAG <sup>3</sup><br>/T <sup>4</sup> | 5364-5712 (349) <sup>b,4</sup>                | 5360-5710 (351) <sup>b,1</sup>    | 5378-5727 (350) <sup>b,2</sup>                    | 5378-5727 (350) <sup>b,2</sup>                 | 5378-5728 (351) <sup>b,1</sup>                   |
| <i>trnA</i>             | +      | TGC       |                                                                                             |                                                                        | 5713-5773 (61)                                | 5710-5770 (61)                    | 5728-5788 (61)                                    | 5728-5788 (61)                                 | 5728-5788 (61)                                   |
| <i>trnR</i>             | +      | TCG       |                                                                                             |                                                                        | 5778-5838 (61)                                | 5775-5835 (61)                    | 5793-5855 (63)                                    | 5793-5855 (63)                                 | 5793-5855 (63)                                   |
| <i>trnN</i>             | +      | GTT       |                                                                                             |                                                                        | 5838-5900 (63)                                | 5835-5898 (64)                    | 5855-5918 (64)                                    | 5855-5918 (64)                                 | 5855-5918 (64)                                   |
| <i>trnS<sub>I</sub></i> | +      | GCT       |                                                                                             |                                                                        | 5901-5954 (54)                                | 5898-5954 (57)                    | 5905-5973 (69)                                    | 5905-5973 (69)                                 | 5905-5973 (69)                                   |
| <i>trnE</i>             | +      | TTC       |                                                                                             |                                                                        | 5955-6017 (63)                                | 5954-6016 (63)                    | 5974-6035 (62)                                    | 5974-6035 (62)                                 | 5974-6035 (62)                                   |
| <i>trnF</i>             | -      | GAA       |                                                                                             |                                                                        | 6018-6085 (68)                                | 6017-6083 (67)                    | 6035-6099 (65)                                    | 6035-6099 (65)                                 | 6035-6099 (65)                                   |
| <i>ND5</i>              | -      |           | ATG <sup>a</sup> /ATT <sup>b</sup> /TTG <sup>c</sup><br>/ATA <sup>d</sup> /GTG <sup>e</sup> | TAA <sup>1</sup> /TAG <sup>2</sup> /T <sup>3</sup>                     | 6086-7760 (1675) <sup>c,3</sup>               | 6084-7758 (1675) <sup>a,3</sup>   | 6100-7774 (1675) <sup>a,3</sup>                   | 6100-7774 (1675) <sup>a,3</sup>                | 6100-7774 (1675) <sup>a,3</sup>                  |
| <i>trnH</i>             | -      | GTG       |                                                                                             |                                                                        | 7761-7820 (60)                                | 7759-7819 (61)                    | 7775-7836 (62)                                    | 7775-7836 (62)                                 | 7775-7836 (62)                                   |
| <i>ND4</i>              | -      |           | ATG <sup>a</sup> /ATT <sup>b</sup> /ATA <sup>c</sup>                                        | TAG <sup>1</sup> /T <sup>2</sup> /TAA <sup>3</sup> /TA <sup>4</sup>    | 7821-9143 (1323) <sup>a,3</sup>               | 7820-9142 (1323) <sup>a,3</sup>   | 7839-9155 (1317) <sup>a,3</sup>                   | 7839-9155 (1317) <sup>a,3</sup>                | 7839-9155 (1317) <sup>a,3</sup>                  |
| <i>ND4L</i>             | -      |           | ATG <sup>a</sup> /ATT <sup>b</sup>                                                          | TAA <sup>1</sup> /TAG <sup>2</sup>                                     | 9137-9409 (273) <sup>a,1</sup>                | 9136-9408 (273) <sup>a,2</sup>    | 9149-9421 (273) <sup>a,1</sup>                    | 9149-9421 (273) <sup>a,1</sup>                 | 9149-9421 (273) <sup>a,1</sup>                   |
| <i>ND6</i>              | +      |           | ATA <sup>a</sup> /ATT <sup>b</sup> /ATC <sup>c</sup>                                        | TAA <sup>1</sup> /T <sup>2</sup>                                       | 9459-9968 (510) <sup>a,1</sup>                | 9458-9979 (522) <sup>b,1</sup>    | 9467-10006 (540) <sup>b,1</sup>                   | 9467-9994 (528) <sup>b,1</sup>                 | 9467-9994 (528) <sup>b,1</sup>                   |
| <i>trnP</i>             | -      | TGG       |                                                                                             |                                                                        | 10063-10124 (62)                              | 10055-10116 (62)                  | 10065-10126 (62)                                  | 10063-10124 (62)                               | 10063-10124 (62)                                 |
| <i>trnT</i>             | +      | TGT       |                                                                                             |                                                                        | 10128-10189 (62)                              | 10119-10182 (64)                  | 10131-10193 (63)                                  | 10129-10191 (63)                               | 10129-10191 (63)                                 |
| <i>CytB</i>             | +      |           | ATG <sup>a</sup> /ATA <sup>b</sup>                                                          | TAA <sup>1</sup> /TAG <sup>2</sup> /T <sup>3</sup>                     | 10194-11295 (1102) <sup>a,3</sup>             | 10187-11290 (1104) <sup>a,2</sup> | 10198-11299 (1102) <sup>a,3</sup>                 | 10196-11299 (1104) <sup>a,2</sup>              | 10196-11299 (1104) <sup>a,2</sup>                |
| <i>trnS<sub>2</sub></i> | +      | TGA       |                                                                                             |                                                                        | 11296-11351 (56)                              | 11289-11344 (56)                  | 11300-11355 (56)                                  | 11298-11353 (56)                               | 11298-11353 (56)                                 |
| <i>NDI</i>              | -      |           | ATG <sup>a</sup> /GTG <sup>b</sup>                                                          | TAA <sup>1</sup> /T <sup>2</sup> /TA <sup>3</sup><br>/TAG <sup>4</sup> | 11369-12286 (918) <sup>a,4</sup>              | 11362-12279 (918) <sup>a,4</sup>  | 11373-12290 (918) <sup>a,4</sup>                  | 11371-12288 (918) <sup>a,4</sup>               | 11371-12288 (918) <sup>a,4</sup>                 |
| <i>trnL<sub>1</sub></i> | -      | TAG       |                                                                                             |                                                                        | 12288-12349 (62)                              | 12281-12342 (62)                  | 12292-12355 (64)                                  | 12290-12353 (64)                               | 12290-12353 (64)                                 |
| <i>lrRNA</i>            | -      |           |                                                                                             |                                                                        | 12350-13574 (1225)                            | 12343-13569 (1227)                | 12356-13574 (1219)                                | 12354-13572 (1219)                             | 12354-13572 (1219)                               |
| <i>trnV</i>             | -      | TAC       |                                                                                             |                                                                        | 13575-13643 (69)                              | 13570-13638 (69)                  | 13575-13642 (68)                                  | 13573-13640 (68)                               | 13573-13640 (68)                                 |
| <i>srRNA</i>            | -      |           |                                                                                             |                                                                        | 13644-14390 (747)                             | 13639-14387 (749)                 | 13643-14389 (747)                                 | 13641-14387 (747)                              | 13641-14387 (747)                                |
| A+T-rich<br>region      |        |           |                                                                                             |                                                                        | 14391-16654 (2264)                            | 14388-16554 (2167)                | 14390-16431 (2042)                                | 14388-16359 (1972)                             | 14388-16359 (1972)                               |

| Gene                    | Strand | Anticodon | Start codon                                                                                 | Stop codon                                                             | <i>Laodelphax striatellus</i><br>A1 (China) | <i>Laodelphax striatellus</i><br>B1 (China) |
|-------------------------|--------|-----------|---------------------------------------------------------------------------------------------|------------------------------------------------------------------------|---------------------------------------------|---------------------------------------------|
| <i>trnI</i>             | +      | GAT       |                                                                                             |                                                                        | 1-66 (66)                                   | 1-66 (66)                                   |
| <i>trnQ</i>             | -      | TTG       |                                                                                             |                                                                        | 69-134 (66)                                 | 69-134 (66)                                 |
| <i>trnM</i>             | +      | CAT       |                                                                                             |                                                                        | 134-198 (65)                                | 134-198 (65)                                |
| <i>ND2</i>              | +      |           | ATT <sup>a</sup> /ATA <sup>b</sup>                                                          | TAA <sup>1</sup> /TAG <sup>2</sup>                                     | 199-1155 (957) <sup>a,1</sup>               | 199-1155 (957) <sup>a,1</sup>               |
| <i>trnC</i>             | -      | GCA       |                                                                                             |                                                                        | 1159-1220 (62)                              | 1159-1220 (62)                              |
| <i>trnW</i>             | +      | TCA       |                                                                                             |                                                                        | 1255-1321 (67)                              | 1255-1321 (67)                              |
| <i>trnY</i>             | -      | GTA       |                                                                                             |                                                                        | 1325-1385 (61)                              | 1325-1385 (61)                              |
| <i>COI</i>              | +      |           | ATC <sup>a</sup> /ATG <sup>b</sup> /ATA <sup>c</sup> /CTG <sup>d</sup>                      | TAA <sup>1</sup> /T <sup>2</sup>                                       | 1390-2923 (1534) <sup>b,2</sup>             | 1390-2923 (1534) <sup>b,2</sup>             |
| <i>trnL<sub>2</sub></i> | +      | TAA       |                                                                                             |                                                                        | 2924-2989 (66)                              | 2924-2989 (66)                              |
| <i>COII</i>             | +      |           | ATA <sup>a</sup> /ATG <sup>b</sup> /ATT <sup>c</sup>                                        | TAA <sup>1</sup> /T <sup>2</sup> /TAG <sup>3</sup>                     | 2990-3652 (663) <sup>c,3</sup>              | 2990-3652 (663) <sup>c,3</sup>              |
| <i>trnK</i>             | +      | CTT       |                                                                                             |                                                                        | 3653-3723 (71)                              | 3653-3723 (71)                              |
| <i>trnD</i>             | +      | GTC       |                                                                                             |                                                                        | 3724-3785 (62)                              | 3724-3785 (62)                              |
| <i>ATP8</i>             | +      |           | ATT <sup>a</sup> /ATA <sup>b</sup> /ATC <sup>c</sup>                                        | TAA <sup>1</sup> /TAG <sup>2</sup>                                     | 3786-3887 (102) <sup>a,1</sup>              | 3786-3887 (102) <sup>a,1</sup>              |
| <i>ATP6</i>             | +      |           | ATG <sup>a</sup> /ATA <sup>b</sup> /ATT <sup>c</sup>                                        | T <sup>1</sup> /TAG <sup>2</sup>                                       | 3881-4535 (655) <sup>a,1</sup>              | 3881-4535 (655) <sup>a,1</sup>              |
| <i>COIII</i>            | +      |           | ATG <sup>a</sup> /ATT <sup>b</sup>                                                          | TAG <sup>1</sup> /T <sup>2</sup> /TAA <sup>3</sup>                     | 4536-5316 (781) <sup>a,2</sup>              | 4536-5316 (781) <sup>a,2</sup>              |
| <i>trnG</i>             | +      | TCC       |                                                                                             |                                                                        | 5317-5377 (61)                              | 5317-5377 (61)                              |
| <i>ND3</i>              | +      |           | ATG <sup>a</sup> /ATT <sup>b</sup> /ATC <sup>c</sup><br>/ATA <sup>d</sup>                   | TAA <sup>1</sup> /TA <sup>2</sup> /TAG <sup>3</sup><br>/T <sup>4</sup> | 5378-5727 (350) <sup>b,2</sup>              | 5378-5727 (350) <sup>b,2</sup>              |
| <i>trnA</i>             | +      | TGC       |                                                                                             |                                                                        | 5728-5788 (61)                              | 5728-5788 (61)                              |
| <i>trnR</i>             | +      | TCG       |                                                                                             |                                                                        | 5793-5855 (63)                              | 5793-5855 (63)                              |
| <i>trnN</i>             | +      | GTT       |                                                                                             |                                                                        | 5855-5918 (64)                              | 5855-5918 (64)                              |
| <i>trnS<sub>I</sub></i> | +      | GCT       |                                                                                             |                                                                        | 5905-5973 (69)                              | 5905-5973 (69)                              |
| <i>trnE</i>             | +      | TTC       |                                                                                             |                                                                        | 5974-6035 (62)                              | 5974-6035 (62)                              |
| <i>trnF</i>             | -      | GAA       |                                                                                             |                                                                        | 6035-6099 (65)                              | 6035-6099 (65)                              |
| <i>ND5</i>              | -      |           | ATG <sup>a</sup> /ATT <sup>b</sup> /TTG <sup>c</sup><br>/ATA <sup>d</sup> /GTG <sup>e</sup> | TAA <sup>1</sup> /TAG <sup>2</sup> /T <sup>3</sup>                     | 6100-7774 (1675) <sup>a,3</sup>             | 6100-7774 (1675) <sup>a,3</sup>             |
| <i>trnH</i>             | -      | GTG       |                                                                                             |                                                                        | 7775-7836 (62)                              | 7775-7836 (62)                              |
| <i>ND4</i>              | -      |           | ATG <sup>a</sup> /ATT <sup>b</sup> /ATA <sup>c</sup>                                        | TAG <sup>1</sup> /T <sup>2</sup> /TAA <sup>3</sup> /TA <sup>4</sup>    | 7839-9155 (1317) <sup>a,3</sup>             | 7839-9155 (1317) <sup>a,3</sup>             |
| <i>ND4L</i>             | -      |           | ATG <sup>a</sup> /ATT <sup>b</sup>                                                          | TAA <sup>1</sup> /TAG <sup>2</sup>                                     | 9149-9421 (273) <sup>a,1</sup>              | 9149-9421 (273) <sup>a,1</sup>              |
| <i>ND6</i>              | +      |           | ATA <sup>a</sup> /ATT <sup>b</sup> /ATC <sup>c</sup>                                        | TAA <sup>1</sup> /T <sup>2</sup>                                       | 9467-10006 (540) <sup>b,1</sup>             | 9467-10006 (540) <sup>b,1</sup>             |
| <i>trnP</i>             | -      | TGG       |                                                                                             |                                                                        | 10065-10126 (62)                            | 10062-10123 (62)                            |
| <i>trnT</i>             | +      | TGT       |                                                                                             |                                                                        | 10131-10193 (63)                            | 10128-10190 (63)                            |
| <i>CytB</i>             | +      |           | ATG <sup>a</sup> /ATA <sup>b</sup>                                                          | TAA <sup>1</sup> /TAG <sup>2</sup> /T <sup>3</sup>                     | 10198-11299 (1102) <sup>a,3</sup>           | 10195-11296 (1102) <sup>a,3</sup>           |
| <i>trnS<sub>2</sub></i> | +      | TGA       |                                                                                             |                                                                        | 11300-11355 (56)                            | 11297-11352 (56)                            |
| <i>NDI</i>              | -      |           | ATG <sup>a</sup> /GTG <sup>b</sup>                                                          | TAA <sup>1</sup> /T <sup>2</sup> /TA <sup>3</sup><br>/TAG <sup>4</sup> | 11373-12290 (918) <sup>a,4</sup>            | 11370-12287 (918) <sup>a,4</sup>            |
| <i>trnL<sub>1</sub></i> | -      | TAG       |                                                                                             |                                                                        | 12292-12355 (64)                            | 12289-12352 (64)                            |
| <i>lrRNA</i>            | -      |           |                                                                                             |                                                                        | 12356-13574 (1219)                          | 12353-13571 (1219)                          |
| <i>trnV</i>             | -      | TAC       |                                                                                             |                                                                        | 13575-13642 (68)                            | 13572-13639 (68)                            |
| <i>srRNA</i>            | -      |           |                                                                                             |                                                                        | 13643-14389 (747)                           | 13640-14386 (747)                           |
| A+T-rich<br>region      |        |           |                                                                                             |                                                                        | 14390-16428 (2039)                          | 14387-16418 (2032)                          |

| Gene                    | Strand | Anticodon | Start codon                                                                              | Stop codon                                                          | <i>Laodelphax striatellus</i><br>(Beijing, China) |
|-------------------------|--------|-----------|------------------------------------------------------------------------------------------|---------------------------------------------------------------------|---------------------------------------------------|
| <i>trnI</i>             | +      | GAT       |                                                                                          |                                                                     | 1-66 (66)                                         |
| <i>trnQ</i>             | -      | TTG       |                                                                                          |                                                                     | 69-134 (66)                                       |
| <i>trnM</i>             | +      | CAT       |                                                                                          |                                                                     | 134-198 (65)                                      |
| <i>ND2</i>              | +      |           | ATT <sup>a</sup> /ATA <sup>b</sup>                                                       | TAA <sup>1</sup> /TAG <sup>2</sup>                                  | 199-1176 (978) <sup>a,1</sup>                     |
| <i>trnC</i>             | -      | GCA       |                                                                                          |                                                                     | 1180-1241 (62)                                    |
| <i>trnW</i>             | +      | TCA       |                                                                                          |                                                                     | 1276-1343 (68)                                    |
| <i>trnY</i>             | -      | GTA       |                                                                                          |                                                                     | 1347-1407 (61)                                    |
| <i>COI</i>              | +      |           | ATC <sup>a</sup> /ATG <sup>b</sup> /ATA <sup>c</sup> /CTG <sup>d</sup>                   | TAA <sup>1</sup> /T <sup>2</sup>                                    | 1412-2945 (1534) <sup>b,2</sup>                   |
| <i>trnL<sub>2</sub></i> | +      | TAA       |                                                                                          |                                                                     | 2946-3011 (66)                                    |
| <i>COII</i>             | +      |           | ATA <sup>a</sup> /ATG <sup>b</sup> /ATT <sup>c</sup>                                     | TAA <sup>1</sup> /T <sup>2</sup> /TAG <sup>3</sup>                  | 3012-3695 (684) <sup>c,1</sup>                    |
| <i>trnK</i>             | +      | CTT       |                                                                                          |                                                                     | 3676-3746 (71)                                    |
| <i>trnD</i>             | +      | GTC       |                                                                                          |                                                                     | 3747-3808 (62)                                    |
| <i>ATP8</i>             | +      |           | ATT <sup>a</sup> /ATA <sup>b</sup> /ATC <sup>c</sup>                                     | TAA <sup>1</sup> /TAG <sup>2</sup>                                  | 3809-3970 (162) <sup>a,1</sup>                    |
| <i>ATP6</i>             | +      |           | ATG <sup>a</sup> /ATA <sup>b</sup> /ATT <sup>c</sup>                                     | T <sup>1</sup> /TAG <sup>2</sup>                                    | 3964-4618 (655) <sup>a,1</sup>                    |
| <i>COIII</i>            | +      |           | ATG <sup>a</sup> /ATT <sup>b</sup>                                                       | TAG <sup>1</sup> /T <sup>2</sup> /TAA <sup>3</sup>                  | 4619-5399 (781) <sup>a,2</sup>                    |
| <i>trnG</i>             | +      | TCC       |                                                                                          |                                                                     | 5400-5460 (61)                                    |
| <i>ND3</i>              | +      |           | ATG <sup>a</sup> /ATT <sup>b</sup> /ATC <sup>c</sup> /ATA <sup>d</sup>                   | TAA <sup>1</sup> /TA <sup>2</sup> /TAG <sup>3</sup> /T <sup>4</sup> | 5461-5811 (351) <sup>b,1</sup>                    |
| <i>trnA</i>             | +      | TGC       |                                                                                          |                                                                     | 5811-5871 (61)                                    |
| <i>trnR</i>             | +      | TCG       |                                                                                          |                                                                     | 5876-5939 (64)                                    |
| <i>trnN</i>             | +      | GTT       |                                                                                          |                                                                     | 5939-6002 (64)                                    |
| <i>trnS<sub>I</sub></i> | +      | GCT       |                                                                                          |                                                                     | 5999-6062 (64)                                    |
| <i>trnE</i>             | +      | TTC       |                                                                                          |                                                                     | 6057-6118 (62)                                    |
| <i>trnF</i>             | -      | GAA       |                                                                                          |                                                                     | 6118-6182 (65)                                    |
| <i>ND5</i>              | -      |           | ATG <sup>a</sup> /ATT <sup>b</sup> /TTG <sup>c</sup> /ATA <sup>d</sup> /GTG <sup>e</sup> | TAA <sup>1</sup> /TAG <sup>2</sup> /T <sup>3</sup>                  | 6183-7914 (1732) <sup>b,3</sup>                   |
| <i>ND4</i>              | -      |           | ATG <sup>a</sup> /ATT <sup>b</sup>                                                       | TAG <sup>1</sup> /T <sup>2</sup> /TAA <sup>3</sup> /TA <sup>4</sup> | 7901-9238 (1338) <sup>a,3</sup>                   |
| <i>ND4L</i>             | -      |           | ATG <sup>a</sup> /ATT <sup>b</sup>                                                       | TAA <sup>1</sup> /TAG <sup>2</sup>                                  | 9232-9504 (273) <sup>a,1</sup>                    |
| <i>trnH</i>             | -      | GTG       |                                                                                          |                                                                     | 9577-9637 (61)                                    |
| <i>ND6</i>              | +      |           | ATA <sup>a</sup> /ATT <sup>b</sup> /ATC <sup>c</sup>                                     | TAA <sup>1</sup> /T <sup>2</sup>                                    | 9637-10147 (511) <sup>a,2</sup>                   |
| <i>trnP</i>             | -      | TGG       |                                                                                          |                                                                     | 10148-10209 (62)                                  |
| <i>trnT</i>             | +      | TGT       |                                                                                          |                                                                     | 10214-10276 (63)                                  |
| <i>CytB</i>             | +      |           | ATG <sup>a</sup> /ATA <sup>b</sup>                                                       | TAA <sup>1</sup> /TAG <sup>2</sup> /T <sup>3</sup>                  | 10281-11384 (1104) <sup>a,2</sup>                 |
| <i>trnS<sub>2</sub></i> | +      | TGA       |                                                                                          |                                                                     | 11370-11440 (71)                                  |
| <i>ND1</i>              | -      |           | ATG <sup>a</sup> /GTG <sup>b</sup>                                                       | TAA <sup>1</sup> /T <sup>2</sup> /TA <sup>3</sup> /TAG <sup>4</sup> | 11421-12374 (954) <sup>a,1</sup>                  |
| <i>trnL<sub>I</sub></i> | -      | TAG       |                                                                                          |                                                                     | 12376-12439 (64)                                  |
| <i>lrRNA</i>            | -      |           |                                                                                          |                                                                     | 12440-13658 (1219)                                |
| <i>trnV</i>             | -      | TAC       |                                                                                          |                                                                     | 13659-13726 (68)                                  |
| <i>srRNA</i>            | -      |           |                                                                                          |                                                                     | 13727-14473 (747)                                 |
| A+T-rich region         |        |           |                                                                                          |                                                                     | 14474-16513 (2040)                                |

**Note:** The gene abbreviations are as follows: *COI*, *COII*, and *COIII* refer to the cytochrome oxidase subunits; *CytB* refers to cytochrome b; *ND1-6* refers to NADH dehydrogenase components; *srRNA* and *lrRNA* refer to small and large subunit ribosomal RNA (rRNA) genes, respectively; tRNAs are denoted as one-letter symbols in accordance with the IUPAC-IUB single-letter amino acid codes, except those encoding leucine and serine, which are labeled *trnL<sub>I</sub>* for the CTN codon family, *trnL<sub>2</sub>* for the TTR codon family, *trnS<sub>I</sub>* for the AGN codon family, and *trnS<sub>2</sub>* for the TCN codon family. Superscripts indicate identical start and stop codons among Fulgoroidea species; +, genes encoded in major strand; -, genes encoded in minor strand. Values in parentheses indicate gene size (bp).

Superscripts indicate identical start and stop codons among Fulgoroidea species.  
‡, partially or fully re-annotated in this study.
