# Supplementary material for: Complete Mitochondrial Genomes of Metcalfa pruinosa and Salurnis marginella (Hemiptera: Flatidae): Genomic Comparison and Phylogenetic Inference in Fulgoroidea
Source: MDPI journal article supplement (doi:10.3390/cimb43030099), 2021-09-30
Supplement: s1 [file s1]

**Table S8**

ANOVA test for mean Ks/Ks ratio of 45 mitochondrial genomes of Fulgoroidea.

## (A) Whole PCGs, major-strand PCGs, and minor-strand PCGs

| Factor     | No. | Mean   | Std Dev. | Lower  | Upper  | Lower 95% | Upper 95% | Prob > F | Min.   | Med.   | Max.   | Connecting Latter |
|------------|-----|--------|----------|--------|--------|-----------|-----------|----------|--------|--------|--------|-------------------|
| PCGs       | 45  | 0.0977 | 0.0062   | 0.0915 | 0.1040 | 0.0958    | 0.0996    |          | 0.0826 | 0.0988 | 0.1122 | A                 |
| PCGs-major | 45  | 0.0841 | 0.0063   | 0.0778 | 0.0904 | 0.0823    | 0.0860    | <.0001   | 0.0713 | 0.0859 | 0.0953 | B                 |
| PCGs-minor | 45  | 0.1131 | 0.0114   | 0.1017 | 0.1245 | 0.1097    | 0.1165    |          | 0.0875 | 0.1156 | 0.1566 | C                 |

## (B) Individual PCGs

| Factor       | No. | Mean   | Std Dev. | Lower  | Upper  | Lower 95% | Upper 95% | Prob > F | Min.   | Med.   | Max.   | Connecting Latter |
|--------------|-----|--------|----------|--------|--------|-----------|-----------|----------|--------|--------|--------|-------------------|
| <i>ATP6</i>  | 44  | 0.1469 | 0.0213   | 0.1257 | 0.1682 | 0.1405    | 0.1534    |          | 0.1000 | 0.1522 | 0.1859 | C                 |
| <i>ATP8</i>  | 44  | 0.3340 | 0.1115   | 0.2224 | 0.4455 | 0.3000    | 0.3679    |          | 0.2352 | 0.2955 | 0.6839 | A                 |
| <i>COI</i>   | 44  | 0.0418 | 0.0035   | 0.0384 | 0.0453 | 0.0408    | 0.0429    |          | 0.0371 | 0.0419 | 0.0534 | E                 |
| <i>COII</i>  | 44  | 0.1120 | 0.0098   | 0.1022 | 0.1218 | 0.1090    | 0.1150    |          | 0.0914 | 0.1101 | 0.1368 | CD                |
| <i>COIII</i> | 44  | 0.0741 | 0.0088   | 0.0653 | 0.0829 | 0.0714    | 0.0768    |          | 0.0559 | 0.0753 | 0.0891 | DE                |
| <i>CytB</i>  | 44  | 0.0837 | 0.0114   | 0.0723 | 0.0951 | 0.0802    | 0.0872    |          | 0.0676 | 0.0831 | 0.1129 | DE                |
| <i>ND1</i>   | 43  | 0.2716 | 0.0373   | 0.2343 | 0.3088 | 0.2601    | 0.2830    | <.0001   | 0.1932 | 0.2770 | 0.3682 | B                 |
| <i>ND2</i>   | 44  | 0.2725 | 0.0367   | 0.2358 | 0.3092 | 0.2614    | 0.2837    |          | 0.2218 | 0.2650 | 0.3492 | B                 |
| <i>ND3</i>   | 44  | 0.2358 | 0.1136   | 0.1222 | 0.3493 | 0.2012    | 0.2703    |          | 0.1326 | 0.1897 | 0.5110 | B                 |
| <i>ND4</i>   | 44  | 0.1222 | 0.0140   | 0.1081 | 0.1362 | 0.1179    | 0.1264    |          | 0.0964 | 0.1223 | 0.1722 | CD                |
| <i>ND4L</i>  | 44  | 0.3808 | 0.1710   | 0.2098 | 0.5518 | 0.3288    | 0.4328    |          | 0.1442 | 0.3483 | 0.8352 | A                 |
| <i>ND5</i>   | 44  | 0.1056 | 0.0168   | 0.0888 | 0.1224 | 0.1005    | 0.1107    |          | 0.0761 | 0.1055 | 0.1437 | CD                |
| <i>ND6</i>   | 44  | 0.3464 | 0.0536   | 0.2927 | 0.4000 | 0.3301    | 0.3627    |          | 0.2483 | 0.3408 | 0.5057 | A                 |

PCG, protein-coding gene.
