# Supplementary material for: Complete Mitochondrial Genomes of Metcalfa pruinosa and Salurnis marginella (Hemiptera: Flatidae): Genomic Comparison and Phylogenetic Inference in Fulgoroidea
Source: MDPI journal article supplement (doi:10.3390/cimb43030099), 2021-09-30
Supplement: s1 [file s1]

**Table S1**List of primers used to amplify the gapped regions of *Metcalfa pruinosa* H1 and H3 haplotypes.

| Fragment name                   | Primer name              | Direction <sup>a</sup> | Sequence (5'-3')          |
|---------------------------------|--------------------------|------------------------|---------------------------|
| Long fragments                  |                          |                        |                           |
| LF1                             | Miseon-LF-COI-F1         | F                      | AGCAGTATTCGCTATTATAGC     |
| "                               | Miseon-LF-CYTB-R1        | R                      | TTGATCCAAAATTCATCATG      |
| LF2                             | Miseon-LF-CYTB-F2        | F                      | AATAACACTACCATTCTCTATG    |
| "                               | Miseon-LF-COI-R2         | R                      | ATTCTTATTATTATCCCACTAG    |
| gap 1 ( <i>COII</i> region)     |                          |                        |                           |
|                                 | Miseon-COII-F (H1)       | F                      | TTTGAAGTATCATTCAGC        |
|                                 | Miseon-COII-R (H1)       | R                      | AATCGTCCTGGAATTGCGTC      |
| gap 2 (3'-end of <i>ND5</i> )   |                          |                        |                           |
|                                 | Miseon-ASN-ND5-F (H1)    | F                      | TAAAAAGAAGCACTTCACTG      |
|                                 | Miseon-ND5-R2 (H1)       | R                      | GTTTTTTTGGTAATCAGGATATTCG |
|                                 | Miseon-H3-ND5-END-F (H3) | F                      | TTTAAGAACCATATAGAAGT      |
|                                 | Miseon-H3-ND5-END-R (H3) | R                      | AACCATTGTTTATAGATTGCG     |
| gap 3 (5'-end of <i>ND5</i> )   |                          |                        |                           |
|                                 | Miseon-ND5-2ND-F1 (H1)   | F                      | ATAAACACAGTAACAAGACCTG    |
|                                 | Miseon-ND5-2ND-R2 (H1)   | R                      | TTTTTTTTTCTGCTTGTATAG     |
|                                 | Miseon-ND5-START-F1 (H3) | F                      | AAAAACAAAATGGAAATTGAGCTC  |
|                                 | Miseon-ND5-START-R1 (H3) | R                      | ATTGGTGTTTGTGTAGTTCGTGA   |
| gap 4 (5'-end of <i>ND4</i> )   |                          |                        |                           |
|                                 | Miseon-ND4-F1 (H1)       | F                      | TAAATTGAACCAAATAAGACC     |
|                                 | Miseon-ND4-R2 (H1)       | R                      | GATTAGTTTTAGTTCGTAAGCA    |
| gap 5 (3'-end of <i>lrRNA</i> ) |                          |                        |                           |
|                                 | Miseon-16S-F2 (H1)       | F                      | AAAAAATTAATCGAATTCATGTC   |
|                                 | Miseon-12S-R2 (H1)       | R                      | ATTTTAAATGATATCCACGA      |

<sup>a</sup>F and R, forward and reverse direction of transcription.

Note that all gap regions except for gap 2 were sequenced after cloning.

With parenthesis indicates the primers designed to target corresponding haplotypes.
