# Supplementary material for: Complete Mitochondrial Genomes of Metcalfa pruinosa and Salurnis marginella (Hemiptera: Flatidae): Genomic Comparison and Phylogenetic Inference in Fulgoroidea
Source: MDPI journal article supplement (doi:10.3390/cimb43030099), 2021-09-30
Supplement: s1 [file s1]

**Table S9**

Overlapping and intergenic-spacer sequences of Fulgoroidea mitochondrial genomes (1/11).

| Region                                 | <i>Metcalfa pruinosa</i> (H1) | <i>Metcalfa pruinosa</i> (H3) | <i>Salurnis marginella</i> | <i>Geisha distinctissima</i> <sup>†</sup> | <i>Pyrops candelaria</i> |
|----------------------------------------|-------------------------------|-------------------------------|----------------------------|-------------------------------------------|--------------------------|
| <i>trnI</i> - <i>trnQ</i>              | (I)3                          | (I)3                          | (I)18                      | (O)1                                      | (I)9                     |
| <i>trnQ</i> - <i>trnM</i>              | (O)1                          | (O)1                          | (O)1                       | (O)1                                      | (I)4                     |
| <i>trnM</i> - <i>ND2</i>               |                               |                               |                            |                                           |                          |
| <i>ND2</i> - <i>trnW</i>               | (O)2                          | (O)2                          | (O)2                       | (O)2                                      | (I)33                    |
| <i>trnW</i> - <i>trnC</i>              | (O)8                          | (O)8                          | (O)8                       | (O)8                                      | (O)8                     |
| <i>trnC</i> - <i>trnY</i>              | (I)7                          | (I)7                          |                            | (I)3                                      |                          |
| <i>trnY</i> - <i>COI</i>               |                               |                               | (I)5                       | (I)6                                      | (I)2                     |
| <i>COI</i> - <i>trnL<sub>2</sub></i>   | (I)2                          | (I)2                          |                            |                                           |                          |
| <i>trnL<sub>2</sub></i> - <i>COII</i>  |                               |                               |                            | (I)1                                      | (I)8                     |
| <i>COII</i> - <i>trnK</i>              | (I)10                         | (I)10                         |                            | (I)2                                      | (I)2                     |
| <i>trnK</i> - <i>trnD</i>              |                               |                               |                            |                                           |                          |
| <i>trnD</i> - <i>ATP8</i>              |                               |                               |                            |                                           |                          |
| <i>ATP8</i> - <i>ATP6</i>              | (O)7                          | (O)7                          | (O)7                       | (O)7                                      | (O)7                     |
| <i>ATP6</i> - <i>COIII</i>             |                               |                               |                            |                                           |                          |
| <i>COIII</i> - <i>trnG</i>             | (I)6                          | (I)6                          | (I)1                       |                                           | (I)6                     |
| <i>trnG</i> - <i>ND3</i>               | (I)1                          | (I)1                          | (I)35                      |                                           |                          |
| <i>ND3</i> - <i>trnA</i>               | (O)2                          | (O)2                          | (O)1                       |                                           | (I)17                    |
| <i>trnA</i> - <i>trnR</i>              | (I)17                         | (I)17                         |                            |                                           | (I)4                     |
| <i>trnR</i> - <i>trnN</i>              | (I)25                         | (I)25                         | (I)1                       | (I)5                                      |                          |
| <i>trnN</i> - <i>trnS<sub>1</sub></i>  | (I)1                          | (I)1                          | (O)2                       |                                           | (O)2                     |
| <i>trnS<sub>1</sub></i> - <i>trnE</i>  | (I)3                          | (I)3                          | (I)2                       | (I)2                                      | (I)2                     |
| <i>trnE</i> - <i>trnF</i>              | (I)12                         | (I)12                         | (O)2                       | (I)3                                      | (O)2                     |
| <i>trnF</i> - <i>ND5</i>               | (I)6                          | (I)6                          | (O)1                       | (O)10                                     |                          |
| <i>ND5</i> - <i>trnH</i>               | (I)1                          | (I)1                          |                            | (I)9                                      |                          |
| <i>trnH</i> - <i>ND4</i>               | (I)14                         | (I)14                         |                            |                                           | (I)4                     |
| <i>ND4</i> - <i>ND4L</i>               | (O)1                          | (O)1                          | (I)1                       | (I)8                                      | (O)7                     |
| <i>ND4L</i> - <i>trnT</i>              | (I)2                          | (I)2                          | (I)2                       | (I)2                                      | (I)16                    |
| <i>trnT</i> - <i>trnP</i>              | (I)7                          | (I)7                          | (I)1                       | (I)3                                      | (I)3                     |
| <i>trnP</i> - <i>ND6</i>               | (I)1                          | (I)1                          | (I)1                       | (O)10                                     | (I)1                     |
| <i>ND6</i> - <i>CytB</i>               | (I)4                          | (I)4                          | (O)8                       | (O)8                                      | (I)3                     |
| <i>CytB</i> - <i>trnS<sub>2</sub></i>  | (I)15                         | (I)15                         | (O)1                       |                                           | (I)17                    |
| <i>trnS<sub>2</sub></i> - <i>ND1</i>   | (I)9                          | (I)9                          | (O)7                       | (I)6                                      | (O)7                     |
| <i>ND1</i> - <i>trnL<sub>1</sub></i>   | (I)1                          | (I)1                          | (I)1                       | (I)1                                      | (I)1                     |
| <i>trnL<sub>1</sub></i> - <i>lrRNA</i> |                               |                               |                            |                                           |                          |
| <i>lrRNA</i> - <i>trnV</i>             |                               |                               |                            |                                           |                          |
| <i>trnV</i> - <i>srRNA</i>             |                               |                               | (O)1                       |                                           |                          |
| <i>srRNA</i> - A+T-rich region         |                               |                               |                            |                                           |                          |
| Total nucleotides                      | (O)21<br>(I)147               | (O)21<br>(I)147               | (O)41<br>(I)68             | (O)47<br>(I)51                            | (O)33<br>(I)132          |

**Table S9**

Continued (2/11).

| Region                                 | <i>Lycorma delicatula</i><br>(Henan, China) | <i>Lycorma delicatula</i><br>(China) | <i>Lycorma delicatula</i><br>(Korea) | <i>Aphaena</i> (Callidepsa)<br><i>amabilis</i> | <i>Aphaena</i> (Aphaena)<br><i>discolor nigrotibiata</i> |
|----------------------------------------|---------------------------------------------|--------------------------------------|--------------------------------------|------------------------------------------------|----------------------------------------------------------|
| <i>trnI</i> - <i>trnQ</i>              | (I)2                                        | (I)2                                 | (I)2                                 | (I)2                                           | (I)2                                                     |
| <i>trnQ</i> - <i>trnM</i>              | (O)1                                        | (O)1                                 | (O)1                                 | (O)1                                           | (O)1                                                     |
| <i>trnM</i> - <i>ND2</i>               |                                             |                                      |                                      |                                                |                                                          |
| <i>ND2</i> - <i>trnW</i>               | (I)2                                        | (I)2                                 | (I)2                                 | (O)2                                           | (I)2                                                     |
| <i>trnW</i> - <i>trnC</i>              | (O)8                                        | (O)8                                 | (O)8                                 | (O)8                                           | (O)8                                                     |
| <i>trnC</i> - <i>trnY</i>              |                                             |                                      |                                      | (I)9                                           | (I)3                                                     |
| <i>trnY</i> - <i>COI</i>               | (I)4                                        | (I)4                                 | (I)4                                 | (I)4                                           | (I)5                                                     |
| <i>COI</i> - <i>trnL<sub>2</sub></i>   |                                             |                                      |                                      |                                                |                                                          |
| <i>trnL<sub>2</sub></i> - <i>COII</i>  |                                             |                                      |                                      |                                                |                                                          |
| <i>COII</i> - <i>trnK</i>              | (I)10                                       | (I)10                                | (I)10                                | (I)9                                           | (I)9                                                     |
| <i>trnK</i> - <i>trnD</i>              |                                             |                                      |                                      |                                                |                                                          |
| <i>trnD</i> - <i>ATP8</i>              |                                             |                                      |                                      |                                                |                                                          |
| <i>ATP8</i> - <i>ATP6</i>              | (O)7                                        | (O)7                                 | (O)7                                 | (O)7                                           | (O)7                                                     |
| <i>ATP6</i> - <i>COIII</i>             |                                             |                                      |                                      |                                                |                                                          |
| <i>COIII</i> - <i>trnG</i>             | (I)5                                        | (I)2                                 | (I)2                                 | (I)3                                           | (I)7                                                     |
| <i>trnG</i> - <i>ND3</i>               |                                             |                                      |                                      |                                                |                                                          |
| <i>ND3</i> - <i>trnA</i>               | (I)25                                       |                                      | (O)1                                 | (I)6                                           | (O)1                                                     |
| <i>trnA</i> - <i>trnR</i>              | (O)4                                        |                                      |                                      | (I)1                                           | (I)1                                                     |
| <i>trnR</i> - <i>trnN</i>              | (O)1                                        | (O)1                                 | (O)1                                 | (I)7                                           | (I)8                                                     |
| <i>trnN</i> - <i>trnS<sub>1</sub></i>  | (O)2                                        | (O)1                                 | (O)2                                 | (O)1                                           | (O)1                                                     |
| <i>trnS<sub>1</sub></i> - <i>trnE</i>  | (O)2                                        | (O)1                                 | (O)2                                 | (O)1                                           | (O)1                                                     |
| <i>trnE</i> - <i>trnF</i>              | (O)2                                        | (O)2                                 | (O)2                                 | (O)2                                           | (O)2                                                     |
| <i>trnF</i> - <i>ND5</i>               | (O)10                                       |                                      |                                      | (I)1                                           | (I)2                                                     |
| <i>ND5</i> - <i>trnH</i>               | (O)1                                        | (O)1                                 | (O)1                                 |                                                |                                                          |
| <i>trnH</i> - <i>ND4</i>               | (O)16                                       |                                      |                                      | (I)1                                           | (I)1                                                     |
| <i>ND4</i> - <i>ND4L</i>               | (O)7                                        | (O)7                                 | (O)7                                 | (O)7                                           | (O)7                                                     |
| <i>ND4L</i> - <i>trnT</i>              | (I)7                                        | (I)7                                 | (I)7                                 | (I)7                                           | (I)7                                                     |
| <i>trnT</i> - <i>trnP</i>              | (I)3                                        | (I)3                                 | (I)3                                 | (I)6                                           | (I)2                                                     |
| <i>trnP</i> - <i>ND6</i>               | (I)1                                        | (I)1                                 | (I)1                                 | (I)1                                           | (I)1                                                     |
| <i>ND6</i> - <i>CytB</i>               | (O)8                                        | (O)8                                 | (I)4                                 | (O)8                                           | (O)8                                                     |
| <i>CytB</i> - <i>trnS<sub>2</sub></i>  | (I)5                                        | (I)5                                 | (I)5                                 | (I)1                                           |                                                          |
| <i>trnS<sub>2</sub></i> - <i>ND1</i>   | (O)8                                        | (O)8                                 | (O)8                                 | (I)3                                           | (I)4                                                     |
| <i>ND1</i> - <i>trnL<sub>1</sub></i>   | (I)1                                        | (I)1                                 | (I)1                                 | (I)1                                           | (I)1                                                     |
| <i>trnL<sub>1</sub></i> - <i>lrRNA</i> |                                             |                                      |                                      |                                                |                                                          |
| <i>lrRNA</i> - <i>trnV</i>             |                                             |                                      |                                      |                                                |                                                          |
| <i>trnV</i> - <i>srRNA</i>             |                                             |                                      | (O)3                                 |                                                |                                                          |
| <i>srRNA</i> - A+T-rich region         |                                             |                                      |                                      |                                                |                                                          |
| Total nucleotides                      | (O)77<br>(I)65                              | (O)45<br>(I)37                       | (O)43<br>(I)41                       | (O)37<br>(I)62                                 | (O)36<br>(I)55                                           |

**Table S9**

Continued (3/11).

| Region                                 | <i>Betatropis formosana</i> | <i>Magadhaideus luodiana</i> sp. nov | <i>Peltatavertexalis horizontalis</i> sp. nov | <i>Plectoderini</i> sp. | <i>Paracatonidia</i> sp. |
|----------------------------------------|-----------------------------|--------------------------------------|-----------------------------------------------|-------------------------|--------------------------|
| <i>trnI</i> - <i>trnQ</i>              | (O)3                        | (I)2                                 | (O)3                                          | (O)3                    | (O)3                     |
| <i>trnQ</i> - <i>trnM</i>              | (O)1                        | (O)1                                 | (O)1                                          | (O)1                    | (O)1                     |
| <i>trnM</i> - <i>ND2</i>               |                             |                                      |                                               |                         |                          |
| <i>ND2</i> - <i>trnW</i>               | (O)2                        | (O)2                                 | (O)2                                          | (O)2                    | (O)2                     |
| <i>trnW</i> - <i>trnC</i>              | (O)8                        | (O)8                                 | (O)8                                          | (O)8                    | (O)8                     |
| <i>trnC</i> - <i>trnY</i>              | (I)12                       | (I)8                                 | (I)5                                          | (I)8                    | (I)3                     |
| <i>trnY</i> - <i>COI</i>               | (I)16                       |                                      |                                               | (I)2                    |                          |
| <i>COI</i> - <i>trnL<sub>2</sub></i>   |                             |                                      |                                               |                         |                          |
| <i>trnL<sub>2</sub></i> - <i>COII</i>  |                             |                                      |                                               |                         |                          |
| <i>COII</i> - <i>trnK</i>              |                             |                                      |                                               | (I)1                    |                          |
| <i>trnK</i> - <i>trnD</i>              |                             |                                      |                                               |                         |                          |
| <i>trnD</i> - <i>ATP8</i>              |                             |                                      |                                               |                         |                          |
| <i>ATP8</i> - <i>ATP6</i>              | (O)7                        | (O)7                                 | (O)7                                          | (O)7                    | (O)7                     |
| <i>ATP6</i> - <i>COIII</i>             |                             |                                      |                                               |                         |                          |
| <i>COIII</i> - <i>trnG</i>             | (O)1                        |                                      |                                               |                         |                          |
| <i>trnG</i> - <i>ND3</i>               | (I)6                        |                                      |                                               |                         |                          |
| <i>ND3</i> - <i>trnA</i>               | (O)2                        |                                      | (I)3                                          | (O)1                    | (O)1                     |
| <i>trnA</i> - <i>trnR</i>              | (I)6                        |                                      | (I)3                                          | (I)5                    |                          |
| <i>trnR</i> - <i>trnN</i>              | (I)2                        | (I)12                                | (I)1                                          | (I)6                    |                          |
| <i>trnN</i> - <i>trnS<sub>1</sub></i>  |                             |                                      |                                               |                         | (O)1                     |
| <i>trnS<sub>1</sub></i> - <i>trnE</i>  | (I)6                        | (I)8                                 |                                               |                         | (I)3                     |
| <i>trnE</i> - <i>trnF</i>              | (I)2                        | (O)1                                 | (I)4                                          | (O)1                    | (I)3                     |
| <i>trnF</i> - <i>ND5</i>               | (I)10                       | (I)2                                 | (O)6                                          | (I)2                    | (O)20                    |
| <i>ND5</i> - <i>trnH</i>               | (I)5                        | (I)8                                 | (I)16                                         | (I)3                    | (O)7                     |
| <i>trnH</i> - <i>ND4</i>               | (I)1                        | (I)1                                 | (I)1                                          | (I)1                    | (I)1                     |
| <i>ND4</i> - <i>ND4L</i>               | (O)7                        | (O)7                                 | (I)45                                         | (I)48                   | (I)69                    |
| <i>ND4L</i> - <i>trnT</i>              | (I)2                        | (I)2                                 | (I)2                                          | (I)1                    | (I)3                     |
| <i>trnT</i> - <i>trnP</i>              | (I)7                        | (I)2                                 |                                               |                         | (I)1                     |
| <i>trnP</i> - <i>ND6</i>               | (I)1                        | (I)1                                 | (I)1                                          | (I)1                    | (I)1                     |
| <i>ND6</i> - <i>CytB</i>               | (O)8                        | (O)8                                 | (O)8                                          | (O)8                    | (I)6                     |
| <i>CytB</i> - <i>trnS<sub>2</sub></i>  | (O)1                        | (O)1                                 | (O)1                                          | (O)1                    | (O)1                     |
| <i>trnS<sub>2</sub></i> - <i>ND1</i>   | (O)1                        | (O)4                                 | (O)2                                          | (O)7                    | (I)5                     |
| <i>ND1</i> - <i>trnL<sub>1</sub></i>   | (I)1                        | (I)1                                 | (I)1                                          | (I)1                    | (I)1                     |
| <i>trnL<sub>1</sub></i> - <i>lrRNA</i> | (I)18                       | (I)3                                 |                                               | (I)3                    |                          |
| <i>lrRNA</i> - <i>trnV</i>             | (I)13                       | (I)7                                 | (I)1008                                       | (I)15                   | (I)18                    |
| <i>trnV</i> - <i>srRNA</i>             | (O)3                        | (O)3                                 | (O)3                                          | (O)3                    | (O)3                     |
| <i>srRNA</i> - A+T-rich region         |                             |                                      |                                               |                         |                          |
| Total nucleotides                      | (O)44<br>(I)108             | (O)42<br>(I)57                       | (O)41<br>(I)1090                              | (O)42<br>(I)97          | (O)54<br>(I)114          |

**Table S9**

Continued (4/11).

| Region                                 | <i>Pentastiridius</i> sp. <sup>‡</sup> | <i>Lydda</i> sp. <sup>‡</sup> | <i>Sivaloka damnosus</i> | <i>Sivaloka</i> sp. <sup>‡</sup> | <i>Ricania marginalis</i> |
|----------------------------------------|----------------------------------------|-------------------------------|--------------------------|----------------------------------|---------------------------|
| <i>trnI</i> - <i>trnQ</i>              | (O)3                                   | (I)1                          |                          | (O)1                             | (I)4                      |
| <i>trnQ</i> - <i>trnM</i>              | (O)2                                   |                               | (O)1                     | (O)1                             | (I)14                     |
| <i>trnM</i> - <i>ND2</i>               |                                        |                               |                          |                                  |                           |
| <i>ND2</i> - <i>trnW</i>               | (O)2                                   | (O)2                          |                          | (O)1                             | (I)27                     |
| <i>trnW</i> - <i>trnC</i>              | (O)8                                   | (O)8                          | (O)9                     | (O)8                             | (O)8                      |
| <i>trnC</i> - <i>trnY</i>              |                                        | (I)2                          | (I)16                    |                                  | (I)12                     |
| <i>trnY</i> - <i>COI</i>               | (O)2                                   | (I)1                          | (I)9                     | (I)1                             | (I)1                      |
| <i>COI</i> - <i>trnL<sub>2</sub></i>   | (I)4                                   | (I)1                          | (O)5                     | (I)1                             | (I)1                      |
| <i>trnL<sub>2</sub></i> - <i>COII</i>  |                                        |                               |                          |                                  |                           |
| <i>COII</i> - <i>trnK</i>              | (I)1                                   |                               |                          |                                  |                           |
| <i>trnK</i> - <i>trnD</i>              |                                        | (I)1                          |                          |                                  | (I)2                      |
| <i>trnD</i> - <i>ATP8</i>              |                                        |                               |                          |                                  |                           |
| <i>ATP8</i> - <i>ATP6</i>              | (O)7                                   | (O)6                          | (O)7                     | (O)7                             | (O)4                      |
| <i>ATP6</i> - <i>COIII</i>             |                                        |                               |                          |                                  | (O)28                     |
| <i>COIII</i> - <i>trnG</i>             | (O)1                                   |                               | (I)20                    |                                  | (I)3                      |
| <i>trnG</i> - <i>ND3</i>               |                                        |                               |                          | (O)1                             |                           |
| <i>ND3</i> - <i>trnA</i>               | (O)1                                   | (O)1                          | (I)6                     | (O)1                             | (I)5                      |
| <i>trnA</i> - <i>trnR</i>              | (O)1                                   |                               |                          |                                  |                           |
| <i>trnR</i> - <i>trnN</i>              | (O)2                                   | (O)1                          | (I)13                    |                                  | (O)3                      |
| <i>trnN</i> - <i>trnS<sub>1</sub></i>  | (O)1                                   |                               | (O)1                     | (O)1                             | (O)1                      |
| <i>trnS<sub>1</sub></i> - <i>trnE</i>  | (O)1                                   | (I)5                          | (I)8                     | (O)1                             | (I)1                      |
| <i>trnE</i> - <i>trnF</i>              |                                        | (O)2                          | (I)4                     | (O)2                             | (I)8                      |
| <i>trnF</i> - <i>ND5</i>               | (I)84                                  |                               | (I)6                     | (O)2                             | (I)6                      |
| <i>ND5</i> - <i>trnH</i>               | (I)140                                 |                               | (I)5                     |                                  | (I)1                      |
| <i>trnH</i> - <i>ND4</i>               |                                        |                               |                          |                                  |                           |
| <i>ND4</i> - <i>ND4L</i>               | (I)5                                   | (I)5                          | (O)7                     | (I)151                           | (O)7                      |
| <i>ND4L</i> - <i>trnT</i>              | (I)11                                  | (I)2                          | (I)2                     | (I)2                             | (I)2                      |
| <i>trnT</i> - <i>trnP</i>              | (O)1                                   | (O)1                          |                          |                                  | (I)11                     |
| <i>trnP</i> - <i>ND6</i>               | (I)1                                   | (I)1                          | (I)1                     | (I)1                             | (I)1                      |
| <i>ND6</i> - <i>CytB</i>               | (I)3                                   | (O)8                          | (O)8                     | (O)8                             | (O)8                      |
| <i>CytB</i> - <i>trnS<sub>2</sub></i>  | (I)1                                   | (O)2                          | (O)1                     | (O)2                             | (O)14                     |
| <i>trnS<sub>2</sub></i> - <i>ND1</i>   |                                        |                               | (I)4                     | (O)7                             | (O)4                      |
| <i>ND1</i> - <i>trnL<sub>1</sub></i>   |                                        | (I)2                          | (I)1                     | (I)1                             | (I)1                      |
| <i>trnL<sub>1</sub></i> - <i>lrRNA</i> |                                        | (O)1                          |                          |                                  |                           |
| <i>lrRNA</i> - <i>trnV</i>             |                                        |                               |                          |                                  |                           |
| <i>trnV</i> - <i>srRNA</i>             |                                        | (I)1                          |                          |                                  |                           |
| <i>srRNA</i> - A+T-rich region         |                                        | (O)1                          |                          |                                  |                           |
| Total nucleotides                      | (O)32<br>(I)250                        | (O)33<br>(I)22                | (O)39<br>(I)95           | (O)43<br>(I)157                  | (O)77<br>(I)100           |

**Table S9**

Continued (5/11).

| Region                                 | <i>Ricania speculum</i> | <i>Ugyops</i> sp. |
|----------------------------------------|-------------------------|-------------------|
| <i>trnI</i> - <i>trnQ</i>              | (I)4                    |                   |
| <i>trnQ</i> - <i>trnM</i>              | (I)14                   | (O)2              |
| <i>trnM</i> - <i>ND2</i>               |                         |                   |
| <i>ND2</i> - <i>trnW</i>               | (I)26                   | (I)3              |
| <i>trnW</i> - <i>trnC</i>              | (O)8                    | (O)8              |
| <i>trnC</i> - <i>trnY</i>              | (I)4                    | (I)1              |
| <i>trnY</i> - <i>COI</i>               | (I)4                    | (O)2              |
| <i>COI</i> - <i>trnL<sub>2</sub></i>   | (I)1                    |                   |
| <i>trnL<sub>2</sub></i> - <i>COII</i>  |                         |                   |
| <i>COII</i> - <i>trnK</i>              |                         | (I)1              |
| <i>trnK</i> - <i>trnD</i>              | (I)2                    |                   |
| <i>trnD</i> - <i>ATP8</i>              |                         |                   |
| <i>ATP8</i> - <i>ATP6</i>              | (O)4                    | (O)4              |
| <i>ATP6</i> - <i>COIII</i>             |                         |                   |
| <i>COIII</i> - <i>trnG</i>             | (I)3                    |                   |
| <i>trnG</i> - <i>ND3</i>               |                         |                   |
| <i>ND3</i> - <i>trnA</i>               | (I)5                    | (O)2              |
| <i>trnA</i> - <i>trnR</i>              | (I)5                    | (I)6              |
| <i>trnR</i> - <i>trnN</i>              | (I)2                    | (O)2              |
| <i>trnN</i> - <i>trnS<sub>1</sub></i>  | (O)1                    | (O)1              |
| <i>trnS<sub>1</sub></i> - <i>trnE</i>  | (I)1                    | (O)1              |
| <i>trnE</i> - <i>trnF</i>              | (I)7                    | (O)2              |
| <i>trnF</i> - <i>ND5</i>               | (I)5                    |                   |
| <i>ND5</i> - <i>trnH</i>               | (I)15                   |                   |
| <i>trnH</i> - <i>ND4</i>               |                         |                   |
| <i>ND4</i> - <i>ND4L</i>               | (O)7                    | (O)7              |
| <i>ND4L</i> - <i>trnT</i>              | (I)2                    | (I)1              |
| <i>trnT</i> - <i>trnP</i>              | (I)11                   | (O)1              |
| <i>trnP</i> - <i>ND6</i>               | (I)1                    | (I)1              |
| <i>ND6</i> - <i>CytB</i>               | (O)8                    |                   |
| <i>CytB</i> - <i>trnS<sub>2</sub></i>  | (O)1                    | (O)1              |
| <i>trnS<sub>2</sub></i> - <i>ND1</i>   | (O)7                    | (I)16             |
| <i>ND1</i> - <i>trnL<sub>1</sub></i>   | (I)1                    | (I)1              |
| <i>trnL<sub>1</sub></i> - <i>lrRNA</i> | (I)23                   |                   |
| <i>lrRNA</i> - <i>trnV</i>             | (O)7                    |                   |
| <i>trnV</i> - <i>srRNA</i>             | (O)3                    |                   |
| <i>srRNA</i> - A+T-rich region         |                         |                   |
| Total nucleotides                      | (O)46<br>(I)136         | (O)33<br>(I)30    |

**Table S9**

Continued (6/11).

| Region                                 | <i>Saccharosydne<br/>procerus</i> | <i>Changeonodelphax<br/>velitchkovskiyi</i> | <i>Nilaparvata bakeri</i><br>(unknown) | <i>Nilaparvata lugens</i><br>(biotype Y, Zhejiang,<br>China) | <i>Nilaparvata lugens</i><br>(biotype L, Zhejiang,<br>China) |
|----------------------------------------|-----------------------------------|---------------------------------------------|----------------------------------------|--------------------------------------------------------------|--------------------------------------------------------------|
| <i>trnI</i> - <i>trnQ</i>              | (I)1                              | (I)5                                        | (I)3                                   | (I)3                                                         | (I)3                                                         |
| <i>trnQ</i> - <i>trnM</i>              | (O)1                              | (O)1                                        | (O)1                                   | (O)1                                                         | (O)1                                                         |
| <i>trnM</i> - <i>ND2</i>               |                                   |                                             |                                        |                                                              |                                                              |
| <i>ND2</i> - <i>trnC</i>               | (O)2                              | (I)3                                        |                                        |                                                              |                                                              |
| <i>trnC</i> - <i>trnW</i>              | (I)8                              | (I)28                                       | (I)12                                  | (I)8                                                         | (I)7                                                         |
| <i>trnW</i> - <i>trnY</i>              | (I)14                             | (I)15                                       | (I)20                                  | (I)20                                                        | (I)20                                                        |
| <i>trnY</i> - <i>COI</i>               | (I)5                              | (I)8                                        | (I)14                                  | (I)13                                                        | (I)13                                                        |
| <i>COI</i> - <i>trnL<sub>2</sub></i>   |                                   |                                             | (O)5                                   | (O)5                                                         | (O)5                                                         |
| <i>trnL<sub>2</sub></i> - <i>COII</i>  |                                   |                                             |                                        |                                                              |                                                              |
| <i>COII</i> - <i>trnK</i>              | (I)2                              | (I)3                                        | (I)6                                   | (I)11                                                        | (I)11                                                        |
| <i>trnK</i> - <i>trnD</i>              |                                   | (I)1                                        |                                        |                                                              |                                                              |
| <i>trnD</i> - <i>ATP8</i>              |                                   |                                             |                                        |                                                              |                                                              |
| <i>ATP8</i> - <i>ATP6</i>              | (O)7                              | (O)7                                        | (O)22                                  | (O)19                                                        | (O)19                                                        |
| <i>ATP6</i> - <i>COIII</i>             |                                   |                                             |                                        |                                                              |                                                              |
| <i>COIII</i> - <i>trnG</i>             |                                   |                                             |                                        |                                                              |                                                              |
| <i>trnG</i> - <i>ND3</i>               |                                   |                                             | (I)101                                 | (I)101                                                       | (I)101                                                       |
| <i>ND3</i> - <i>trnA</i>               | (I)5                              | (O)2                                        | (I)8                                   | (I)5                                                         | (I)5                                                         |
| <i>trnA</i> - <i>trnR</i>              |                                   | (I)4                                        | (I)4                                   | (I)4                                                         | (I)4                                                         |
| <i>trnR</i> - <i>trnN</i>              | (I)1                              | (I)3                                        | (O)1                                   | (O)1                                                         | (O)1                                                         |
| <i>trnN</i> - <i>trnS<sub>I</sub></i>  | (O)1                              | (O)1                                        | (O)1                                   | (O)1                                                         | (O)1                                                         |
| <i>trnS<sub>I</sub></i> - <i>trnE</i>  | (O)1                              | (O)1                                        | (O)1                                   | (O)1                                                         | (O)1                                                         |
| <i>trnE</i> - <i>trnF</i>              | (I)4                              |                                             |                                        |                                                              |                                                              |
| <i>trnF</i> - <i>ND5</i>               |                                   |                                             |                                        |                                                              |                                                              |
| <i>ND5</i> - <i>trnH</i>               |                                   |                                             | (O)1                                   | (O)1                                                         | (O)1                                                         |
| <i>trnH</i> - <i>ND4</i>               | (I)3                              |                                             |                                        |                                                              |                                                              |
| <i>ND4</i> - <i>ND4L</i>               | (O)7                              | (O)7                                        | (O)10                                  | (O)10                                                        | (O)10                                                        |
| <i>ND4L</i> - <i>ND6</i>               | (I)49                             | (I)45                                       | (I)34                                  | (I)33                                                        | (I)33                                                        |
| <i>ND6</i> - <i>trnP</i>               | (I)64                             | (I)146                                      | (I)70                                  | (I)48                                                        | (I)48                                                        |
| <i>trnP</i> - <i>trnT</i>              | (I)1                              |                                             |                                        |                                                              |                                                              |
| <i>trnT</i> - <i>CytB</i>              | (I)4                              | (I)5                                        | (I)8                                   | (I)7                                                         | (I)7                                                         |
| <i>CytB</i> - <i>trnS<sub>2</sub></i>  | (I)1                              | (I)2                                        | (O)10                                  | (O)10                                                        | (O)10                                                        |
| <i>trnS<sub>2</sub></i> - <i>ND1</i>   | (I)15                             | (I)217                                      | (I)20                                  | (I)20                                                        | (I)20                                                        |
| <i>ND1</i> - <i>trnL<sub>1</sub></i>   | (I)1                              | (I)1                                        | (I)1                                   | (I)1                                                         | (I)1                                                         |
| <i>trnL<sub>1</sub></i> - <i>lrRNA</i> |                                   |                                             |                                        |                                                              |                                                              |
| <i>lrRNA</i> - <i>trnV</i>             |                                   |                                             |                                        |                                                              |                                                              |
| <i>trnV</i> - <i>srRNA</i>             |                                   |                                             | (I)4                                   | (I)4                                                         | (I)4                                                         |
| <i>srRNA</i> - A+T-rich region         |                                   |                                             |                                        |                                                              |                                                              |
| Total nucleotides                      | (O)19<br>(I)178                   | (O)19<br>(I)486                             | (O)52<br>(I)305                        | (O)49<br>(I)278                                              | (O)49<br>(I)277                                              |

**Table S9**

Continued (7/11).

| Region                                 | <i>Nilaparvata lugens</i><br>(Hainan, China) | <i>Nilaparvata lugens</i><br>(Hadong-gun, Korea) <sup>‡</sup> | <i>Nilaparvata lugens</i><br>(Guangdong, China) |
|----------------------------------------|----------------------------------------------|---------------------------------------------------------------|-------------------------------------------------|
| <i>trnI</i> - <i>trnQ</i>              | (I)3                                         | (O)3                                                          | (I)3                                            |
| <i>trnQ</i> - <i>trnM</i>              | (O)1                                         | (O)1                                                          | (O)1                                            |
| <i>trnM</i> - <i>ND2</i>               |                                              |                                                               |                                                 |
| <i>ND2</i> - <i>trnC</i>               |                                              | (O)57                                                         |                                                 |
| <i>trnC</i> - <i>trnC</i>              | (I)348                                       | (I)349                                                        | (I)345                                          |
| <i>trnC</i> - <i>trnC</i>              | (I)348                                       | (I)346                                                        | (I)346                                          |
| <i>trnC</i> - <i>trnW</i>              | (I)10                                        | (I)11                                                         | (I)10                                           |
| <i>trnW</i> - <i>trnY</i>              | (I)9                                         | (I)8                                                          | (I)9                                            |
| <i>trnY</i> - <i>COI</i>               | (I)13                                        | (I)13                                                         | (I)13                                           |
| <i>COI</i> - <i>trnL<sub>2</sub></i>   |                                              |                                                               |                                                 |
| <i>trnL<sub>2</sub></i> - <i>COII</i>  |                                              |                                                               |                                                 |
| <i>COII</i> - <i>trnK</i>              | (I)11                                        | (I)11                                                         | (I)11                                           |
| <i>trnK</i> - <i>trnD</i>              |                                              |                                                               |                                                 |
| <i>trnD</i> - <i>ATP8</i>              |                                              |                                                               |                                                 |
| <i>ATP8</i> - <i>ATP6</i>              | (O)1                                         | (O)1                                                          | (O)1                                            |
| <i>ATP6</i> - <i>COIII</i>             |                                              |                                                               |                                                 |
| <i>COIII</i> - <i>trnG</i>             |                                              |                                                               |                                                 |
| <i>trnG</i> - <i>ND3</i>               |                                              |                                                               |                                                 |
| <i>ND3</i> - <i>trnA</i>               | (I)1                                         | (I)1                                                          | (I)1                                            |
| <i>trnA</i> - <i>trnR</i>              | (I)4                                         | (I)4                                                          | (I)4                                            |
| <i>trnR</i> - <i>trnN</i>              | (O)1                                         | (O)1                                                          | (O)1                                            |
| <i>trnN</i> - <i>trnS<sub>1</sub></i>  |                                              |                                                               |                                                 |
| <i>trnS<sub>1</sub></i> - <i>trnE</i>  |                                              |                                                               |                                                 |
| <i>trnE</i> - <i>trnF</i>              |                                              |                                                               |                                                 |
| <i>trnF</i> - <i>ND5</i>               |                                              |                                                               |                                                 |
| <i>ND5</i> - <i>trnH</i>               |                                              |                                                               |                                                 |
| <i>trnH</i> - <i>ND4</i>               |                                              |                                                               | (O)1                                            |
| <i>ND4</i> - <i>ND4L</i>               | (O)7                                         | (O)7                                                          | (O)7                                            |
| <i>ND4L</i> - <i>ND6</i>               | (I)33                                        | (I)33                                                         | (I)33                                           |
| <i>ND6</i> - <i>trnP</i>               | (I)48                                        | (I)48                                                         | (I)48                                           |
| <i>trnP</i> - <i>trnT</i>              |                                              |                                                               |                                                 |
| <i>trnT</i> - <i>CytB</i>              | (I)7                                         | (I)7                                                          | (I)7                                            |
| <i>CytB</i> - <i>trnS<sub>2</sub></i>  | (O)10                                        | (O)10                                                         | (O)10                                           |
| <i>trnS<sub>2</sub></i> - <i>ND1</i>   | (I)20                                        | (O)15                                                         | (I)20                                           |
| <i>ND1</i> - <i>trnL<sub>1</sub></i>   | (I)1                                         | (I)1                                                          | (I)1                                            |
| <i>trnL<sub>1</sub></i> - <i>lrRNA</i> |                                              |                                                               |                                                 |
| <i>lrRNA</i> - <i>trnV</i>             | (O)1                                         | (O)1                                                          | (O)1                                            |
| <i>trnV</i> - <i>srRNA</i>             | (O)1                                         | (O)1                                                          | (O)1                                            |
| <i>srRNA</i> - A+T-rich region         |                                              |                                                               |                                                 |
| Total nucleotides                      | (O)22<br>(I)856                              | (O)97<br>(I)832                                               | (O)23<br>(I)851                                 |

**Table S9**

Continued (8/11).

| Region                                 | <i>Nilaparvata lugens</i><br>(biotype 1, Zhejiang,<br>China) | <i>Nilaparvata lugens</i><br>(biotype 2, Zhejiang,<br>China) | <i>Nilaparvata lugens</i><br>(biotype 3, Zhejiang,<br>China) | <i>Nilaparvata muiri</i> | <i>Nilaparvata</i> sp. <sup>‡</sup> |
|----------------------------------------|--------------------------------------------------------------|--------------------------------------------------------------|--------------------------------------------------------------|--------------------------|-------------------------------------|
| <i>trnI</i> - <i>trnQ</i>              | (I)3                                                         | (I)3                                                         | (I)3                                                         | (I)2                     | (I)16                               |
| <i>trnQ</i> - <i>trnM</i>              | (O)1                                                         | (O)1                                                         | (O)1                                                         | (O)1                     | (O)1                                |
| <i>trnM</i> - <i>ND2</i>               |                                                              |                                                              |                                                              |                          | (O)2                                |
| <i>ND2</i> - <i>trnC</i>               |                                                              |                                                              |                                                              |                          | (I)19                               |
| <i>trnC</i> - <i>trnW</i>              | (I)8                                                         | (I)8                                                         | (I)8                                                         | (I)7                     | (I)3                                |
| <i>trnW</i> - <i>trnY</i>              | (I)20                                                        | (I)20                                                        | (I)20                                                        | (I)20                    | (I)9                                |
| <i>trnY</i> - <i>COI</i>               | (I)13                                                        | (I)13                                                        | (I)13                                                        | (I)14                    |                                     |
| <i>COI</i> - <i>trnL<sub>2</sub></i>   | (O)5                                                         | (O)5                                                         | (O)5                                                         | (O)5                     |                                     |
| <i>trnL<sub>2</sub></i> - <i>COII</i>  |                                                              |                                                              |                                                              |                          |                                     |
| <i>COII</i> - <i>trnK</i>              | (I)11                                                        | (I)11                                                        | (I)11                                                        | (I)6                     | (I)1                                |
| <i>trnK</i> - <i>trnD</i>              |                                                              |                                                              |                                                              |                          |                                     |
| <i>trnD</i> - <i>ATP8</i>              |                                                              |                                                              |                                                              |                          | (I)1                                |
| <i>ATP8</i> - <i>ATP6</i>              | (O)19                                                        | (O)19                                                        | (O)19                                                        | (O)19                    | (O)7                                |
| <i>ATP6</i> - <i>COIII</i>             |                                                              |                                                              |                                                              |                          |                                     |
| <i>COIII</i> - <i>trnG</i>             |                                                              |                                                              |                                                              |                          | (I)1                                |
| <i>trnG</i> - <i>ND3</i>               | (I)101                                                       | (I)101                                                       | (I)101                                                       | (I)101                   |                                     |
| <i>ND3</i> - <i>trnA</i>               | (I)5                                                         | (I)5                                                         | (I)5                                                         | (I)7                     | (O)2                                |
| <i>trnA</i> - <i>trnR</i>              | (I)4                                                         | (I)4                                                         | (I)4                                                         | (I)4                     | (I)4                                |
| <i>trnR</i> - <i>trnN</i>              | (O)1                                                         | (O)1                                                         | (O)1                                                         | (O)1                     | (O)1                                |
| <i>trnN</i> - <i>trnS<sub>I</sub></i>  | (O)1                                                         | (O)1                                                         | (O)1                                                         | (O)1                     |                                     |
| <i>trnS<sub>I</sub></i> - <i>trnE</i>  | (O)1                                                         | (O)1                                                         | (O)1                                                         | (O)1                     | (O)1                                |
| <i>trnE</i> - <i>trnF</i>              |                                                              |                                                              |                                                              |                          | (I)1                                |
| <i>trnF</i> - <i>ND5</i>               |                                                              |                                                              |                                                              |                          | (O)1                                |
| <i>ND5</i> - <i>trnH</i>               | (O)4                                                         | (O)4                                                         | (O)3                                                         | (O)3                     | (I)2                                |
| <i>trnH</i> - <i>ND4</i>               |                                                              |                                                              | (O)1                                                         | (O)1                     | (I)1                                |
| <i>ND4</i> - <i>ND4L</i>               | (O)10                                                        | (O)10                                                        | (O)10                                                        | (O)10                    | (I)11                               |
| <i>ND4L</i> - <i>ND6</i>               | (I)33                                                        | (I)33                                                        | (I)33                                                        | (I)34                    | (I)39                               |
| <i>ND6</i> - <i>trnP</i>               | (I)47                                                        | (I)48                                                        | (I)48                                                        | (I)55                    | (I)219                              |
| <i>trnP</i> - <i>trnT</i>              |                                                              |                                                              |                                                              |                          | (I)1                                |
| <i>trnT</i> - <i>CytB</i>              | (I)7                                                         | (I)7                                                         | (I)7                                                         | (I)10                    | (I)4                                |
| <i>CytB</i> - <i>trnS<sub>2</sub></i>  | (O)10                                                        | (O)10                                                        | (O)10                                                        | (O)12                    | (O)1                                |
| <i>trnS<sub>2</sub></i> - <i>ND1</i>   | (I)20                                                        | (I)20                                                        | (I)20                                                        | (I)22                    | (I)17                               |
| <i>ND1</i> - <i>trnL<sub>1</sub></i>   | (I)1                                                         | (I)1                                                         | (I)1                                                         | (O)1                     | (I)1                                |
| <i>trnL<sub>1</sub></i> - <i>lrRNA</i> |                                                              |                                                              |                                                              |                          |                                     |
| <i>lrRNA</i> - <i>trnV</i>             |                                                              |                                                              |                                                              |                          |                                     |
| <i>trnV</i> - <i>srRNA</i>             | (I)4                                                         | (I)4                                                         | (I)4                                                         | (I)2                     |                                     |
| <i>srRNA</i> - A+T-rich region         |                                                              |                                                              |                                                              |                          |                                     |
| Total nucleotides                      | (O)52<br>(I)277                                              | (O)52<br>(I)278                                              | (O)52<br>(I)278                                              | (O)55<br>(I)284          | (O)16<br>(I)350                     |



**Table S9**

Continued (9/11).

| Region                                 | <i>Peregrinus maidis</i> | <i>Sogatella furcifera</i><br>(Hainan, China) | <i>Sogatella furcifera</i><br>(Yunnan, China) | <i>Sogatella vibix</i> | <i>Laodelphax striatellus</i><br>(Jiangsu, China) |
|----------------------------------------|--------------------------|-----------------------------------------------|-----------------------------------------------|------------------------|---------------------------------------------------|
| <i>trnI</i> - <i>trnQ</i>              | (I)16                    | (I)2                                          | (I)2                                          | (I)2                   | (I)2                                              |
| <i>trnQ</i> - <i>trnM</i>              | (O)1                     | (O)1                                          | (O)1                                          | (O)1                   | (O)1                                              |
| <i>trnM</i> - <i>ND2</i>               |                          |                                               |                                               |                        |                                                   |
| <i>ND2</i> - <i>trnC</i>               | (O)2                     | (O)2                                          | (O)2                                          | (O)2                   | (I)3                                              |
| <i>trnC</i> - <i>trnW</i>              | (I)40                    | (I)18                                         | (I)18                                         | (I)16                  | (I)34                                             |
| <i>trnW</i> - <i>trnY</i>              | (I)1                     | (I)10                                         | (I)10                                         | (I)9                   | (I)3                                              |
| <i>trnY</i> - <i>COI</i>               | (I)8                     | (I)1                                          | (I)1                                          | (I)1                   | (I)4                                              |
| <i>COI</i> - <i>trnL<sub>2</sub></i>   |                          |                                               |                                               |                        |                                                   |
| <i>trnL<sub>2</sub></i> - <i>COII</i>  |                          |                                               |                                               |                        |                                                   |
| <i>COII</i> - <i>trnK</i>              | (I)1                     |                                               |                                               | (I)1                   |                                                   |
| <i>trnK</i> - <i>trnD</i>              |                          |                                               |                                               |                        |                                                   |
| <i>trnD</i> - <i>ATP8</i>              |                          | (I)2                                          | (I)2                                          |                        |                                                   |
| <i>ATP8</i> - <i>ATP6</i>              | (O)4                     | (O)7                                          | (O)7                                          | (O)7                   | (O)7                                              |
| <i>ATP6</i> - <i>COIII</i>             |                          |                                               |                                               |                        |                                                   |
| <i>COIII</i> - <i>trnG</i>             |                          |                                               |                                               |                        |                                                   |
| <i>trnG</i> - <i>ND3</i>               |                          |                                               |                                               |                        |                                                   |
| <i>ND3</i> - <i>trnA</i>               | (I)1                     |                                               |                                               | (O)1                   |                                                   |
| <i>trnA</i> - <i>trnR</i>              | (I)4                     | (I)4                                          | (I)4                                          | (I)4                   | (I)4                                              |
| <i>trnR</i> - <i>trnN</i>              | (O)1                     | (O)1                                          | (O)1                                          | (O)1                   | (O)1                                              |
| <i>trnN</i> - <i>trnS<sub>1</sub></i>  | (O)1                     |                                               |                                               | (O)1                   | (O)14                                             |
| <i>trnS<sub>1</sub></i> - <i>trnE</i>  | (O)1                     |                                               |                                               | (O)1                   |                                                   |
| <i>trnE</i> - <i>trnF</i>              | (O)1                     |                                               |                                               |                        | (O)1                                              |
| <i>trnF</i> - <i>ND5</i>               |                          |                                               |                                               |                        |                                                   |
| <i>ND5</i> - <i>trnH</i>               | (I)2                     |                                               |                                               |                        |                                                   |
| <i>trnH</i> - <i>ND4</i>               | (I)1                     |                                               |                                               |                        | (I)2                                              |
| <i>ND4</i> - <i>ND4L</i>               | (O)7                     | (O)7                                          | (O)7                                          | (O)7                   | (O)7                                              |
| <i>ND4L</i> - <i>ND6</i>               | (I)53                    | (I)49                                         | (I)49                                         | (I)49                  | (I)45                                             |
| <i>ND6</i> - <i>trnP</i>               | (I)338                   | (I)93                                         | (I)94                                         | (I)75                  | (I)58                                             |
| <i>trnP</i> - <i>trnT</i>              | (I)1                     | (I)3                                          | (I)3                                          | (I)2                   | (I)4                                              |
| <i>trnT</i> - <i>CytB</i>              | (I)4                     | (I)4                                          | (I)4                                          | (I)4                   | (I)4                                              |
| <i>CytB</i> - <i>trnS<sub>2</sub></i>  | (O)1                     |                                               |                                               | (O)2                   |                                                   |
| <i>trnS<sub>2</sub></i> - <i>ND1</i>   | (I)17                    | (I)17                                         | (I)17                                         | (I)17                  | (I)17                                             |
| <i>ND1</i> - <i>trnL<sub>1</sub></i>   | (I)1                     | (I)1                                          | (I)1                                          | (I)1                   | (I)1                                              |
| <i>trnL<sub>1</sub></i> - <i>lrRNA</i> |                          |                                               |                                               |                        |                                                   |
| <i>lrRNA</i> - <i>trnV</i>             |                          |                                               |                                               |                        |                                                   |
| <i>trnV</i> - <i>srRNA</i>             |                          |                                               |                                               |                        |                                                   |
| <i>srRNA</i> - A+T-rich region         |                          |                                               |                                               |                        |                                                   |
| Total nucleotides                      | (O)19<br>(I)488          | (O)18<br>(I)204                               | (O)18<br>(I)205                               | (O)23<br>(I)181        | (O)31<br>(I)181                                   |

**Table S9**

Continued (10/11).

| Region                                 | <i>Laodelphax striatella</i><br>(Suwon, Korea) | <i>Laodelphax striatella</i><br>(Milyang, Korea) | <i>Laodelphax striatellus</i><br>A1 (China) | <i>Laodelphax striatellus</i><br>B1 (China) |
|----------------------------------------|------------------------------------------------|--------------------------------------------------|---------------------------------------------|---------------------------------------------|
| <i>trnI</i> - <i>trnQ</i>              | (I)2                                           | (I)2                                             | (I)2                                        | (I)2                                        |
| <i>trnQ</i> - <i>trnM</i>              | (O)1                                           | (O)1                                             | (O)1                                        | (O)1                                        |
| <i>trnM</i> - <i>ND2</i>               |                                                |                                                  |                                             |                                             |
| <i>ND2</i> - <i>trnC</i>               | (I)3                                           | (I)3                                             | (I)3                                        | (I)3                                        |
| <i>trnC</i> - <i>trnW</i>              | (I)34                                          | (I)34                                            | (I)34                                       | (I)34                                       |
| <i>trnW</i> - <i>trnY</i>              | (I)3                                           | (I)3                                             | (I)3                                        | (I)3                                        |
| <i>trnY</i> - <i>COI</i>               | (I)4                                           | (I)4                                             | (I)4                                        | (I)4                                        |
| <i>COI</i> - <i>trnL<sub>2</sub></i>   |                                                |                                                  |                                             |                                             |
| <i>trnL<sub>2</sub></i> - <i>COII</i>  |                                                |                                                  |                                             |                                             |
| <i>COII</i> - <i>trnK</i>              |                                                |                                                  |                                             |                                             |
| <i>trnK</i> - <i>trnD</i>              |                                                |                                                  |                                             |                                             |
| <i>trnD</i> - <i>ATP8</i>              |                                                |                                                  |                                             |                                             |
| <i>ATP8</i> - <i>ATP6</i>              | (O)7                                           | (O)7                                             | (O)7                                        | (O)7                                        |
| <i>ATP6</i> - <i>COIII</i>             |                                                |                                                  |                                             |                                             |
| <i>COIII</i> - <i>trnG</i>             |                                                |                                                  |                                             |                                             |
| <i>trnG</i> - <i>ND3</i>               |                                                |                                                  |                                             |                                             |
| <i>ND3</i> - <i>trnA</i>               |                                                | (O)1                                             |                                             |                                             |
| <i>trnA</i> - <i>trnR</i>              | (I)4                                           | (I)4                                             | (I)4                                        | (I)4                                        |
| <i>trnR</i> - <i>trnN</i>              | (O)1                                           | (O)1                                             | (O)1                                        | (O)1                                        |
| <i>trnN</i> - <i>trnS<sub>I</sub></i>  | (O)14                                          | (O)14                                            | (O)14                                       | (O)14                                       |
| <i>trnS<sub>I</sub></i> - <i>trnE</i>  |                                                |                                                  |                                             |                                             |
| <i>trnE</i> - <i>trnF</i>              | (O)1                                           | (O)1                                             | (O)1                                        | (O)1                                        |
| <i>trnF</i> - <i>ND5</i>               |                                                |                                                  |                                             |                                             |
| <i>ND5</i> - <i>trnH</i>               |                                                |                                                  |                                             |                                             |
| <i>trnH</i> - <i>ND4</i>               | (I)2                                           | (I)2                                             | (I)2                                        | (I)2                                        |
| <i>ND4</i> - <i>ND4L</i>               | (O)7                                           | (O)7                                             | (O)7                                        | (O)7                                        |
| <i>ND4L</i> - <i>ND6</i>               | (I)45                                          | (I)45                                            | (I)45                                       | (I)45                                       |
| <i>ND6</i> - <i>trnP</i>               | (I)68                                          | (I)68                                            | (I)58                                       | (I)55                                       |
| <i>trnP</i> - <i>trnT</i>              | (I)4                                           | (I)4                                             | (I)4                                        | (I)4                                        |
| <i>trnT</i> - <i>CytB</i>              | (I)4                                           | (I)4                                             | (I)4                                        | (I)4                                        |
| <i>CytB</i> - <i>trnS<sub>2</sub></i>  | (O)2                                           | (O)2                                             |                                             |                                             |
| <i>trnS<sub>2</sub></i> - <i>ND1</i>   | (I)17                                          | (I)17                                            | (I)17                                       | (I)17                                       |
| <i>ND1</i> - <i>trnL<sub>1</sub></i>   | (I)1                                           | (I)1                                             | (I)1                                        | (I)1                                        |
| <i>trnL<sub>1</sub></i> - <i>lrRNA</i> |                                                |                                                  |                                             |                                             |
| <i>lrRNA</i> - <i>trnV</i>             |                                                |                                                  |                                             |                                             |
| <i>trnV</i> - <i>srRNA</i>             |                                                |                                                  |                                             |                                             |
| <i>srRNA</i> - A+T-rich region         |                                                |                                                  |                                             |                                             |
| Total nucleotides                      | (O)33<br>(I)191                                | (O)34<br>(I)191                                  | (O)31<br>(I)181                             | (O)31<br>(I)178                             |

**Table S9**

Continued (11/11).

| Region                                 | <i>Laodelphax striatellus</i><br>(Beijing, China) |
|----------------------------------------|---------------------------------------------------|
| <i>trnI</i> - <i>trnQ</i>              | (I)2                                              |
| <i>trnQ</i> - <i>trnM</i>              | (O)1                                              |
| <i>trnM</i> - <i>ND2</i>               |                                                   |
| <i>ND2</i> - <i>trnC</i>               | (I)3                                              |
| <i>trnC</i> - <i>trnW</i>              | (I)34                                             |
| <i>trnW</i> - <i>trnY</i>              | (I)3                                              |
| <i>trnY</i> - <i>COI</i>               | (I)4                                              |
| <i>COI</i> - <i>trnL<sub>2</sub></i>   |                                                   |
| <i>trnL<sub>2</sub></i> - <i>COII</i>  |                                                   |
| <i>COII</i> - <i>trnK</i>              | (O)20                                             |
| <i>trnK</i> - <i>trnD</i>              |                                                   |
| <i>trnD</i> - <i>ATP8</i>              |                                                   |
| <i>ATP8</i> - <i>ATP6</i>              | (O)7                                              |
| <i>ATP6</i> - <i>COIII</i>             |                                                   |
| <i>COIII</i> - <i>trnG</i>             |                                                   |
| <i>trnG</i> - <i>ND3</i>               |                                                   |
| <i>ND3</i> - <i>trnA</i>               | (O)1                                              |
| <i>trnA</i> - <i>trnR</i>              | (I)4                                              |
| <i>trnR</i> - <i>trnN</i>              | (O)1                                              |
| <i>trnN</i> - <i>trnS<sub>1</sub></i>  | (O)4                                              |
| <i>trnS<sub>1</sub></i> - <i>trnE</i>  | (O)6                                              |
| <i>trnE</i> - <i>trnF</i>              | (O)1                                              |
| <i>trnF</i> - <i>ND5</i>               |                                                   |
| <i>ND5</i> - <i>ND4</i>                | (O)14                                             |
| <i>ND4</i> - <i>ND4L</i>               | (O)7                                              |
| <i>ND4L</i> - <i>trnH</i>              | (I)72                                             |
| <i>trnH</i> - <i>ND6</i>               | (O)1                                              |
| <i>ND6</i> - <i>trnP</i>               |                                                   |
| <i>trnP</i> - <i>trnT</i>              | (I)4                                              |
| <i>trnT</i> - <i>CytB</i>              | (I)4                                              |
| <i>CytB</i> - <i>trnS<sub>2</sub></i>  | (O)15                                             |
| <i>trnS<sub>2</sub></i> - <i>ND1</i>   | (O)20                                             |
| <i>ND1</i> - <i>trnL<sub>1</sub></i>   | (I)1                                              |
| <i>trnL<sub>1</sub></i> - <i>lrRNA</i> |                                                   |
| <i>lrRNA</i> - <i>trnV</i>             |                                                   |
| <i>trnV</i> - <i>srRNA</i>             |                                                   |
| <i>srRNA</i> - A+T-rich region         |                                                   |
| Total nucleotides                      | (O)98<br>(I)131                                   |

(O), overlapping sequences; (I), intergenic spacer sequences. An empty column indicates that neighboring genes were abutting to each other.

‡, partially or fully re-annotated in this study.
