# Supplementary material for: Complete Mitochondrial Genomes of Metcalfa pruinosa and Salurnis marginella (Hemiptera: Flatidae): Genomic Comparison and Phylogenetic Inference in Fulgoroidea
Source: MDPI journal article supplement (doi:10.3390/cimb43030099), 2021-09-30
Supplement: s1 [file s1]

**Table S6**  
Skewness of 45 mitochondrial genomes Fulgoroidea.

| Taxon                                                  | Whole genome |        | Whole PCG |        | PCG-major strand |        | PCG-Minor strand |       |
|--------------------------------------------------------|--------------|--------|-----------|--------|------------------|--------|------------------|-------|
|                                                        | A/T          | G/C    | A/T       | G/C    | A/T              | G/C    | A/T              | G/C   |
| <b>Flatidae</b>                                        |              |        |           |        |                  |        |                  |       |
| Flatinae                                               |              |        |           |        |                  |        |                  |       |
| <i>Metcalfa pruinosa</i> (H1)                          | 0.262        | -0.274 | -0.106    | -0.062 | 0.149            | -0.241 | -0.483           | 0.289 |
| <i>Metcalfa pruinosa</i> (H3)                          | 0.261        | -0.274 | -0.106    | -0.062 | 0.147            | -0.241 | -0.483           | 0.289 |
| <i>Salurnis marginella</i>                             | 0.242        | -0.248 | -0.119    | -0.077 | 0.131            | -0.236 | -0.490           | 0.247 |
| <i>Geisha distinctissima</i>                           | 0.265        | -0.269 | -0.132    | -0.049 | 0.125            | -0.250 | -0.528           | 0.328 |
| <b>Fulgoridae</b>                                      |              |        |           |        |                  |        |                  |       |
| Fulgorinae                                             |              |        |           |        |                  |        |                  |       |
| <i>Pyrops candelaria</i>                               | 0.284        | -0.195 | -0.106    | -0.055 | 0.168            | -0.210 | -0.514           | 0.236 |
| Aphaeninae                                             |              |        |           |        |                  |        |                  |       |
| <i>Lycorma delicatula</i> (Henan, China)               | 0.275        | -0.280 | -0.107    | -0.080 | 0.161            | -0.301 | -0.508           | 0.336 |
| <i>Lycorma delicatula</i> (China)                      | 0.277        | -0.283 | -0.108    | -0.085 | 0.161            | -0.301 | -0.512           | 0.327 |
| <i>Lycorma delicatula</i> (Korea)                      | 0.273        | -0.277 | -0.108    | -0.085 | 0.163            | -0.301 | -0.512           | 0.327 |
| <i>Aphaena</i> (Callidepsa) <i>amabilis</i>            | 0.277        | -0.267 | -0.117    | -0.079 | 0.152            | -0.269 | -0.514           | 0.299 |
| <i>Aphaena</i> (Aphaena) <i>discolor nigrotibiata</i>  | 0.299        | -0.278 | -0.110    | -0.071 | 0.176            | -0.274 | -0.534           | 0.320 |
| <b>Achilidae</b>                                       |              |        |           |        |                  |        |                  |       |
| Achilinae                                              |              |        |           |        |                  |        |                  |       |
| <i>Betatropis formosana</i>                            | 0.265        | -0.256 | -0.108    | -0.067 | 0.156            | -0.279 | -0.499           | 0.356 |
| <i>Magadhaideus luodiana</i> sp. nov                   | 0.199        | -0.253 | -0.131    | -0.087 | 0.103            | -0.289 | -0.472           | 0.314 |
| <i>Peltatavertexalis horizontalis</i> sp. nov          | 0.256        | -0.273 | -0.120    | -0.058 | 0.124            | -0.249 | -0.488           | 0.313 |
| <i>Plectoderini</i> sp.                                | 0.258        | -0.284 | -0.113    | -0.078 | 0.144            | -0.302 | -0.494           | 0.369 |
| <i>Paracatonidia</i> sp.                               | 0.234        | -0.319 | -0.118    | -0.085 | 0.118            | -0.326 | -0.475           | 0.388 |
| <b>Cixiidae</b>                                        |              |        |           |        |                  |        |                  |       |
| Cixiinae                                               |              |        |           |        |                  |        |                  |       |
| <i>Pentastiridius</i> sp.                              | 0.183        | -0.304 | -0.106    | -0.098 | 0.065            | -0.289 | -0.451           | 0.376 |
| <b>Derbidae</b>                                        |              |        |           |        |                  |        |                  |       |
| Otiocerinae                                            |              |        |           |        |                  |        |                  |       |
| <i>Lydda</i> sp.                                       | 0.223        | -0.280 | -0.112    | -0.088 | 0.100            | -0.295 | -0.442           | 0.313 |
| <b>Issidae</b>                                         |              |        |           |        |                  |        |                  |       |
| Issinae                                                |              |        |           |        |                  |        |                  |       |
| <i>Sivaloka damnosus</i>                               | 0.226        | -0.243 | -0.130    | -0.049 | 0.091            | -0.226 | -0.465           | 0.294 |
| <i>Sivaloka</i> sp.                                    | 0.230        | -0.259 | -0.120    | -0.065 | 0.092            | -0.255 | -0.463           | 0.310 |
| <b>Ricaniidae</b>                                      |              |        |           |        |                  |        |                  |       |
| Ricaniinae                                             |              |        |           |        |                  |        |                  |       |
| <i>Ricania marginalis</i>                              | 0.236        | -0.213 | -0.120    | -0.064 | 0.107            | -0.203 | -0.469           | 0.190 |
| <i>Ricania speculum</i>                                | 0.251        | -0.218 | -0.151    | -0.055 | 0.099            | -0.207 | -0.530           | 0.233 |
| <b>Delphacidae</b>                                     |              |        |           |        |                  |        |                  |       |
| Asiracinae                                             |              |        |           |        |                  |        |                  |       |
| <i>Ugyops</i> sp.                                      | 0.289        | -0.268 | -0.102    | -0.068 | 0.190            | -0.270 | -0.541           | 0.327 |
| Delphacinae                                            |              |        |           |        |                  |        |                  |       |
| Saccharosydniini                                       |              |        |           |        |                  |        |                  |       |
| <i>Saccharosydne procerus</i>                          | 0.133        | -0.221 | -0.144    | -0.067 | -0.001           | -0.222 | -0.364           | 0.234 |
| Delphacini                                             |              |        |           |        |                  |        |                  |       |
| <i>Changeondelphax velitchkovskiyi</i>                 | 0.131        | -0.273 | -0.152    | -0.098 | 0.006            | -0.299 | -0.386           | 0.286 |
| <i>Nilaparvata bakeri</i> (unknown)                    | 0.106        | -0.231 | -0.149    | -0.085 | -0.027           | -0.247 | -0.329           | 0.224 |
| <i>Nilaparvata lugens</i> (biotype Y, Zhejiang, China) | 0.111        | -0.227 | -0.157    | -0.071 | -0.032           | -0.231 | -0.344           | 0.238 |
| <i>Nilaparvata lugens</i> (biotype L, Zhejiang, China) | 0.111        | -0.224 | -0.158    | -0.067 | -0.032           | -0.223 | -0.344           | 0.238 |
| <i>Nilaparvata lugens</i> (Hainan, China)              | 0.091        | -0.183 | -0.155    | -0.075 | -0.031           | -0.233 | -0.344           | 0.238 |
| <i>Nilaparvata lugens</i> (Hadong-gun, Korea)          | 0.089        | -0.188 | -0.155    | -0.067 | -0.031           | -0.230 | -0.340           | 0.240 |
| <i>Nilaparvata lugens</i> (Guangdong, China)           | 0.089        | -0.183 | -0.156    | -0.071 | -0.032           | -0.230 | -0.344           | 0.238 |
| <i>Nilaparvata lugens</i> (biotype 1, Zhejiang, China) | 0.111        | -0.227 | -0.158    | -0.071 | -0.032           | -0.228 | -0.344           | 0.238 |
| <i>Nilaparvata lugens</i> (biotype 2, Zhejiang, China) | 0.111        | -0.227 | -0.157    | -0.071 | -0.030           | -0.231 | -0.342           | 0.238 |
| <i>Nilaparvata lugens</i> (biotype 3, Zhejiang, China) | 0.111        | -0.222 | -0.157    | -0.071 | -0.030           | -0.231 | -0.343           | 0.232 |
| <i>Nilaparvata muiri</i>                               | 0.110        | -0.227 | -0.151    | -0.086 | -0.026           | -0.234 | -0.334           | 0.213 |
| <i>Nilaparvata</i> sp.                                 | 0.113        | -0.247 | -0.153    | -0.082 | -0.020           | -0.251 | -0.357           | 0.251 |
| <i>Peregrinus maidis</i>                               | 0.108        | -0.243 | -0.150    | -0.083 | -0.011           | -0.254 | -0.359           | 0.256 |
| <i>Sogatella furcifera</i> (Hainan, China)             | 0.092        | -0.143 | -0.169    | -0.067 | -0.044           | -0.170 | -0.356           | 0.140 |
| <i>Sogatella furcifera</i> (Yunnan, China)             | 0.094        | -0.143 | -0.169    | -0.070 | -0.043           | -0.173 | -0.356           | 0.140 |
| <i>Sogatella vibix</i>                                 | 0.099        | -0.158 | -0.162    | -0.073 | -0.033           | -0.182 | -0.358           | 0.138 |
| <i>Laodelphax striatellus</i> (Jiangsu, China)         | 0.119        | -0.184 | -0.144    | -0.091 | 0.000            | -0.245 | -0.359           | 0.217 |
| <i>Laodelphax striatellus</i> (Suwon, Korea)           | 0.120        | -0.189 | -0.145    | -0.091 | 0.000            | -0.242 | -0.359           | 0.217 |
| <i>Laodelphax striatellus</i> (Milyang, Korea)         | 0.120        | -0.189 | -0.145    | -0.091 | 0.000            | -0.242 | -0.359           | 0.217 |
| <i>Laodelphax striatellus</i> A1 (China)               | 0.119        | -0.184 | -0.145    | -0.091 | -0.001           | -0.242 | -0.357           | 0.217 |
| <i>Laodelphax striatellus</i> B1 (China)               | 0.119        | -0.184 | -0.145    | -0.091 | 0.000            | -0.245 | -0.359           | 0.217 |
| <i>Laodelphax striatellus</i> (Beijing, China)         | 0.119        | -0.184 | -0.137    | -0.083 | 0.007            | -0.237 | -0.346           | 0.217 |

PCG, protein-coding gene. Stop codon was excluded in the count.
