# Supplementary material for: Complete Mitochondrial Genomes of Metcalfa pruinosa and Salurnis marginella (Hemiptera: Flatidae): Genomic Comparison and Phylogenetic Inference in Fulgoroidea
Source: MDPI journal article supplement (doi:10.3390/cimb43030099), 2021-09-30
Supplement: s1 [file s1]

**Table S4**

Frequency of four most frequently used codons in 45 mitochondrial genomes of Fulgoroidea.

| Taxon                                                          | GenBank<br>accession no. | PCGs    |         |         |         | Total |
|----------------------------------------------------------------|--------------------------|---------|---------|---------|---------|-------|
|                                                                |                          | TTT (F) | ATT (I) | ATA (I) | TTA (L) |       |
| <b>Fulgoroidea</b>                                             |                          |         |         |         |         |       |
| <b>Flatidae</b>                                                |                          |         |         |         |         |       |
| Flatinae                                                       |                          |         |         |         |         |       |
| <i>Metcalfa pruinosa</i> (H1)                                  | MK303326                 | 11.52   | 9.00    | 8.64    | 6.46    | 35.61 |
| <i>Metcalfa pruinosa</i> (H3)                                  | MN417319                 | 11.52   | 9.00    | 8.64    | 6.48    | 35.64 |
| <i>Salurnis marginella</i>                                     | MT628542                 | 11.58   | 8.74    | 8.08    | 6.38    | 34.78 |
| <i>Geisha distinctissima</i>                                   | FJ230961                 | 10.76   | 7.76    | 7.18    | 6.30    | 32.01 |
| <b>Fulgoridae</b>                                              |                          |         |         |         |         |       |
| Fulgorinae                                                     |                          |         |         |         |         |       |
| <i>Pyrops candelaria</i>                                       | FJ006724                 | 10.26   | 7.11    | 8.67    | 4.67    | 30.71 |
| Aphaeninae                                                     |                          |         |         |         |         |       |
| <i>Lycorma delicatula</i> (Henan, China)                       | EU909203                 | 10.74   | 7.53    | 8.46    | 6.32    | 33.04 |
| <i>Lycorma delicatula</i> (China)                              | FJ456942                 | 11.33   | 7.60    | 8.48    | 6.26    | 33.67 |
| <i>Lycorma delicatula</i> (Korea)                              | MN607209                 | 11.32   | 7.25    | 7.06    | 5.52    | 31.15 |
| <i>Aphaena</i> ( <i>Callidepsa</i> ) <i>amabilis</i>           | MN025522                 | 12.17   | 8.34    | 8.89    | 7.30    | 36.70 |
| <i>Aphaena</i> ( <i>Aphaena</i> ) <i>discolor nigrotibiata</i> | MN025523                 | 12.12   | 8.24    | 8.87    | 6.60    | 35.82 |
| <b>Achilidae</b>                                               |                          |         |         |         |         |       |
| Achilinae                                                      |                          |         |         |         |         |       |
| <i>Betatropis formosana</i>                                    | MH324927                 | 11.83   | 8.33    | 8.41    | 7.35    | 35.92 |
| <i>Magadhaideus luodiana</i> sp. nov                           | MH324928                 | 10.25   | 7.45    | 7.29    | 5.15    | 30.14 |
| <i>Peltatavertexalis horizontalis</i> sp. nov                  | MH324929                 | 10.86   | 8.19    | 8.36    | 5.66    | 33.07 |
| <i>Plectoderini</i> sp.                                        | MH324930                 | 11.00   | 7.76    | 7.76    | 5.82    | 32.35 |
| <i>Paracatonidia</i> sp.                                       | MH324931                 | 10.95   | 8.01    | 8.56    | 6.72    | 34.24 |
| <b>Cixiidae</b>                                                |                          |         |         |         |         |       |
| Cixiinae                                                       |                          |         |         |         |         |       |
| <i>Pentastiridius</i> sp.                                      | KY039133                 | 9.59    | 9.74    | 7.19    | 7.96    | 34.47 |
| <b>Derbidae</b>                                                |                          |         |         |         |         |       |
| Otiocerinae                                                    |                          |         |         |         |         |       |
| <i>Lydda</i> sp.                                               | KY039126                 | 10.70   | 9.75    | 8.17    | 8.95    | 37.57 |
| <b>Issidae</b>                                                 |                          |         |         |         |         |       |
| Issinae                                                        |                          |         |         |         |         |       |
| <i>Sivaloka damnosus</i>                                       | FJ360694                 | 11.70   | 8.72    | 7.42    | 6.73    | 34.57 |
| <i>Sivaloka</i> sp.                                            | KY039137                 | 10.41   | 9.68    | 7.82    | 6.67    | 34.58 |
| <b>Ricaniidae</b>                                              |                          |         |         |         |         |       |
| Ricaniinae                                                     |                          |         |         |         |         |       |
| <i>Ricania marginalis</i>                                      | JN242415                 | 11.19   | 8.69    | 6.72    | 6.28    | 32.89 |
| <i>Ricania speculum</i>                                        | KX371891                 | 11.76   | 8.27    | 6.68    | 5.66    | 32.36 |
| <b>Delphacidae</b>                                             |                          |         |         |         |         |       |
| Asiracinae                                                     |                          |         |         |         |         |       |
| <i>Ugyops</i> sp.                                              | MH352481                 | 11.46   | 7.45    | 9.50    | 6.48    | 34.88 |
| Delphacinae                                                    |                          |         |         |         |         |       |
| Saccharosydnini                                                |                          |         |         |         |         |       |
| <i>Saccharosydne procerus</i>                                  | MG515237                 | 10.55   | 11.16   | 6.94    | 11.80   | 40.45 |
| Delphacini                                                     |                          |         |         |         |         |       |
| <i>Changeondelphax velitchkovskyi</i>                          | MG049916                 | 9.35    | 8.37    | 5.82    | 9.90    | 33.44 |

|                                                        |          |       |      |      |       |       |
|--------------------------------------------------------|----------|-------|------|------|-------|-------|
| <i>Nilaparvata bakeri</i> (unknown)                    | KC333655 | 10.02 | 9.66 | 6.50 | 9.55  | 35.73 |
| <i>Nilaparvata bakeri</i> (biotype Y, Zhejiang, China) | KC333653 | 9.83  | 9.74 | 6.03 | 9.52  | 35.12 |
| <i>Nilaparvata bakeri</i> (biotype L, Zhejiang, China) | KC333654 | 9.83  | 9.74 | 6.03 | 9.52  | 35.12 |
| <i>Nilaparvata lugens</i> (Hainan, China)              | JX880069 | 9.95  | 9.73 | 6.40 | 9.70  | 35.78 |
| <i>Nilaparvata lugens</i> (Hadong-gun, Korea)          | MK590088 | 10.11 | 9.70 | 6.38 | 9.84  | 36.03 |
| <i>Nilaparvata lugens</i> (Guangdong, China)           | MK606371 | 9.98  | 9.73 | 6.38 | 9.75  | 35.84 |
| <i>Nilaparvata lugens</i> (biotype 1, Zhejiang, China) | JN563995 | 9.85  | 9.74 | 6.06 | 9.52  | 35.18 |
| <i>Nilaparvata lugens</i> (biotype 2, Zhejiang, China) | JN563996 | 9.74  | 9.72 | 6.09 | 9.58  | 35.12 |
| <i>Nilaparvata lugens</i> (biotype 3, Zhejiang, China) | JN563997 | 9.80  | 9.66 | 6.11 | 9.52  | 35.09 |
| <i>Nilaparvata mui</i>                                 | JN563998 | 9.60  | 9.32 | 6.20 | 9.02  | 34.14 |
| <i>Nilaparvata</i> sp.                                 | KY039125 | 9.61  | 9.48 | 6.35 | 10.09 | 35.52 |
| <i>Peregrinus maidis</i>                               | MG049917 | 9.32  | 8.95 | 6.04 | 10.78 | 35.10 |
| <i>Sogatella furcifera</i> (Hainan, China)             | KC512914 | 10.32 | 8.96 | 5.57 | 9.37  | 34.22 |
| <i>Sogatella furcifera</i> (Yunnan, China)             | KC512915 | 10.32 | 8.96 | 5.57 | 9.35  | 34.19 |
| <i>Sogatella vibix</i>                                 | MG515238 | 10.11 | 9.12 | 5.76 | 9.64  | 34.64 |
| <i>Laodelphax striatellus</i> (Jiangsu, China)         | JX880068 | 9.49  | 9.08 | 5.81 | 9.96  | 34.35 |
| <i>Laodelphax striatellus</i> (Suwon, Korea)           | MK838101 | 9.59  | 9.09 | 5.79 | 9.95  | 34.41 |
| <i>Laodelphax striatellus</i> (Milyang, Korea)         | MK862265 | 9.59  | 9.09 | 5.79 | 9.95  | 34.41 |
| <i>Laodelphax striatellus</i> A1 (China)               | MK292897 | 9.58  | 9.00 | 5.90 | 10.07 | 34.54 |
| <i>Laodelphax striatellus</i> B1 (China)               | MK292932 | 9.49  | 9.05 | 5.87 | 9.99  | 34.40 |
| <i>Laodelphax striatellus</i> (Beijing, China)         | FJ360695 | 9.63  | 8.92 | 5.71 | 10.07 | 34.33 |

---

Within parenthesis indicate corresponding amino acids.
