# Supplementary material for: Complete Mitochondrial Genomes of Metcalfa pruinosa and Salurnis marginella (Hemiptera: Flatidae): Genomic Comparison and Phylogenetic Inference in Fulgoroidea
Source: MDPI journal article supplement (doi:10.3390/cimb43030099), 2021-09-30
Supplement: s1 [file s1]

**Table S10**

BLAST results of the repeat sequences found in the A+T-rich region of Flatidae species.

| Species                  | Repeat A                                                                            |                              |                | Repeat B                                                                         |                              |                | Repeat C                                                                             |                              |                |
|--------------------------|-------------------------------------------------------------------------------------|------------------------------|----------------|----------------------------------------------------------------------------------|------------------------------|----------------|--------------------------------------------------------------------------------------|------------------------------|----------------|
|                          | Description                                                                         | Identity<br>(Query<br>Cover) | GenBank<br>no. | Description                                                                      | Identity<br>(Query<br>Cover) | GenBank<br>no. | Description                                                                          | Identity<br>(Query<br>Cover) | GenBank<br>no. |
| <i>M. pruinosa</i>       | <i>Pan troglodytes</i><br>BAC clone RP43-29J18<br>from chromosome 7<br>(Chimpanzee) | 94.12%<br>(29%)              | AC146279       | <i>Raphanus sativus</i><br>chromosome 8<br>(Radish)                              | 100%<br>(83%)                | LR778317       | <i>Spirometra</i><br><i>erinaceieuropaei</i> ,<br>scaffold0147443<br>(Cestoda)       | 100%<br>(100%)               | LN165237       |
|                          |                                                                                     |                              |                |                                                                                  |                              |                | <i>Sarcophilus harrisii</i> ,<br>chromosome X<br>(Tasmanian devil)                   | 100%<br>(100%)               | LR735560       |
| <i>S. marginella</i>     | <i>Rhodocytophaga</i> sp.<br>172606-1 chromosome,<br>complete genome<br>(Bacteria)  | 84.62%<br>(54%)              | CP048222       | <i>Aquila chrysaetos</i><br><i>chrysaetos</i><br>chromosome 18<br>(Golden eagle) | 85.37%<br>(62%)              | LR606198       | <i>Canis lupus familiaris</i><br>breed Labrador retriever<br>chromosome 06a<br>(Dog) | 100%<br>(100%)               | CP050586       |
| <i>G. distinctissima</i> | <i>Schistosoma mansoni</i><br>chromosome W<br>(Trematoda)                           | 96.00%<br>(64%)              | HE601631       | <i>Frederiksenia canicola</i><br>complete genome<br>(Bacteria)                   | 93.55%<br>(26%)              | CP015029       | <i>Crassostrea gigas</i> ,<br>chromosome 10<br>(Pacific oyster)                      | 100%<br>(100%)               | CP048848       |
|                          |                                                                                     |                              |                |                                                                                  |                              |                | <i>Culicoides sonorensis</i> ,<br>scaffold33<br>(Punkie)                             | 100%<br>(100%)               | LN483383       |
