# Supplementary material for: Complete Mitochondrial Genomes of Metcalfa pruinosa and Salurnis marginella (Hemiptera: Flatidae): Genomic Comparison and Phylogenetic Inference in Fulgoroidea
Source: MDPI journal article supplement (doi:10.3390/cimb43030099), 2021-09-30
Supplement: s1 [file s1]

Table S7

Ka/Ks ratio of protein-coding genes in 45 mitochondrial genomes of Fulgoroidea.

| Species                                                        | PCGs   |        |        | Major-strand PCG |        |        | Minor-strand PCGs |        |        |
|----------------------------------------------------------------|--------|--------|--------|------------------|--------|--------|-------------------|--------|--------|
|                                                                | Ka     | Ks     | Ka/Ks  | Ka               | Ks     | Ka/Ks  | Ka                | Ks     | Ka/Ks  |
| <b>Fulgoroidea</b>                                             |        |        |        |                  |        |        |                   |        |        |
| <b>Flatidae</b>                                                |        |        |        |                  |        |        |                   |        |        |
| Flatinae                                                       |        |        |        |                  |        |        |                   |        |        |
| <i>Metcalfa pruinosa</i> (H1)                                  | 0.4780 | 5.1564 | 0.0927 | 0.4405           | 5.7321 | 0.0769 | 0.5888            | 5.5307 | 0.1065 |
| <i>Metcalfa pruinosa</i> (H3)                                  | 0.4787 | 5.1545 | 0.0929 | 0.4415           | 5.7285 | 0.0771 | 0.5879            | 5.5317 | 0.1063 |
| <i>Salurnis marginella</i>                                     | 0.4811 | 5.1757 | 0.0929 | 0.4456           | 5.6546 | 0.0788 | 0.5793            | 5.6699 | 0.1022 |
| <i>Geisha distinctissima</i>                                   | 0.4882 | 4.7852 | 0.1020 | 0.4413           | 5.4352 | 0.0812 | 0.6251            | 4.9619 | 0.1260 |
| <b>Fulgoridae</b>                                              |        |        |        |                  |        |        |                   |        |        |
| Fulgorinae                                                     |        |        |        |                  |        |        |                   |        |        |
| <i>Pyrops candelaria</i>                                       | 0.5001 | 4.4889 | 0.1114 | 0.4691           | 4.9236 | 0.0953 | 0.5806            | 4.9932 | 0.1163 |
| Aphaeninae                                                     |        |        |        |                  |        |        |                   |        |        |
| <i>Lycorma delicatula</i> (Henan, China)                       | 0.4865 | 5.0366 | 0.0966 | 0.4455           | 5.6297 | 0.0791 | 0.5998            | 5.5967 | 0.1072 |
| <i>Lycorma delicatula</i> (China)                              | 0.4772 | 5.1504 | 0.0927 | 0.4416           | 5.6915 | 0.0776 | 0.5755            | 5.8545 | 0.0983 |
| <i>Lycorma delicatula</i> (Korea)                              | 0.4782 | 5.1384 | 0.0931 | 0.4423           | 5.7005 | 0.0776 | 0.5690            | 6.5022 | 0.0875 |
| <i>Aphaena</i> ( <i>Callidepsa</i> ) <i>amabilis</i>           | 0.4860 | 5.3906 | 0.0902 | 0.4543           | 6.0451 | 0.0751 | 0.5870            | 6.0873 | 0.0964 |
| <i>Aphaena</i> ( <i>Aphaena</i> ) <i>discolor nigrotibiata</i> | 0.4849 | 5.1275 | 0.0946 | 0.4573           | 5.8834 | 0.0777 | 0.5805            | 5.6180 | 0.1033 |
| <b>Achilidae</b>                                               |        |        |        |                  |        |        |                   |        |        |
| Achilinae                                                      |        |        |        |                  |        |        |                   |        |        |
| <i>Betatropis formosana</i>                                    | 0.4800 | 5.2248 | 0.0919 | 0.4490           | 5.9000 | 0.0761 | 0.5654            | 4.7197 | 0.1198 |
| <i>Magadhaideus luodiana</i> sp. nov                           | 0.4885 | 4.4312 | 0.1103 | 0.4433           | 4.7532 | 0.0933 | 0.5748            | 4.8082 | 0.1195 |
| <i>Peltatavertexalis horizontalis</i> sp. nov                  | 0.4856 | 4.9169 | 0.0988 | 0.4437           | 5.3385 | 0.0831 | 0.5942            | 5.0915 | 0.1167 |
| <i>Plectoderini</i> sp.                                        | 0.4858 | 4.8000 | 0.1012 | 0.4462           | 5.1524 | 0.0866 | 0.5865            | 5.2409 | 0.1119 |
| <i>Paracatonidia</i> sp.                                       | 0.4685 | 5.1277 | 0.0914 | 0.4319           | 5.7053 | 0.0757 | 0.5542            | 5.2030 | 0.1065 |
| <b>Cixiidae</b>                                                |        |        |        |                  |        |        |                   |        |        |
| Cixiinae                                                       |        |        |        |                  |        |        |                   |        |        |
| <i>Pentastiridius</i> sp.                                      | 0.4789 | 5.1556 | 0.0929 | 0.4518           | 5.5447 | 0.0815 | 0.5599            | 5.1704 | 0.1083 |
| <b>Derbidae</b>                                                |        |        |        |                  |        |        |                   |        |        |
| Otiocerinae                                                    |        |        |        |                  |        |        |                   |        |        |
| <i>Lydda</i> sp.                                               | 0.4865 | 5.3193 | 0.0915 | 0.4515           | 5.9683 | 0.0756 | 0.5870            | 5.3815 | 0.1091 |
| <b>Issidae</b>                                                 |        |        |        |                  |        |        |                   |        |        |
| Issinae                                                        |        |        |        |                  |        |        |                   |        |        |
| <i>Sivaloka damnosus</i>                                       | 0.5252 | 4.6808 | 0.1122 | 0.4719           | 5.3747 | 0.0878 | 0.6544            | 4.1794 | 0.1566 |
| <i>Sivaloka</i> sp.                                            | 0.4556 | 5.3276 | 0.0855 | 0.4259           | 5.5910 | 0.0762 | 0.5626            | 6.0192 | 0.0935 |
| <b>Ricaniidae</b>                                              |        |        |        |                  |        |        |                   |        |        |
| Ricaniinae                                                     |        |        |        |                  |        |        |                   |        |        |
| <i>Ricania marginalis</i>                                      | 0.4987 | 4.8020 | 0.1038 | 0.4564           | 5.5054 | 0.0829 | 0.6028            | 4.4061 | 0.1368 |
| <i>Ricania speculum</i>                                        | 0.4674 | 5.0202 | 0.0931 | 0.4278           | 5.4042 | 0.0792 | 0.5660            | 5.2673 | 0.1075 |
| <b>Delphacidae</b>                                             |        |        |        |                  |        |        |                   |        |        |
| Asiracinae                                                     |        |        |        |                  |        |        |                   |        |        |
| <i>Ugyops</i> sp.                                              | 0.4732 | 5.3467 | 0.0885 | 0.4481           | 6.1408 | 0.0730 | 0.5728            | 6.1580 | 0.0930 |
| Delphacinae                                                    |        |        |        |                  |        |        |                   |        |        |
| Saccharosydmini                                                |        |        |        |                  |        |        |                   |        |        |
| <i>Saccharosydne procerus</i>                                  | 0.4882 | 5.9126 | 0.0826 | 0.4502           | 6.3138 | 0.0713 | 0.5863            | 5.7587 | 0.1018 |
| Delphacini                                                     |        |        |        |                  |        |        |                   |        |        |
| <i>Changeondelphax velitchkovskiy</i>                          | 0.5032 | 4.6081 | 0.1092 | 0.4560           | 4.8531 | 0.0939 | 0.5654            | 4.7197 | 0.1198 |
| <i>Nilaparvata bakeri</i> (unknown)                            | 0.4855 | 5.2052 | 0.0933 | 0.4466           | 5.2539 | 0.0850 | 0.5730            | 5.2730 | 0.1087 |
| <i>Nilaparvata lugens</i> (biotype Y, Zhejiang, China)         | 0.4939 | 4.9521 | 0.0997 | 0.4526           | 5.0665 | 0.0893 | 0.5790            | 4.9300 | 0.1174 |
| <i>Nilaparvata lugens</i> (biotype L, Zhejiang, China)         | 0.4944 | 4.9684 | 0.0995 | 0.4528           | 5.0990 | 0.0888 | 0.5808            | 4.9239 | 0.1180 |
| <i>Nilaparvata lugens</i> (Hainan, China)                      | 0.4903 | 5.0290 | 0.0975 | 0.4467           | 5.1829 | 0.0862 | 0.5796            | 4.9481 | 0.1171 |
| <i>Nilaparvata lugens</i> (Hadong-gun, Korea)                  | 0.4901 | 5.0926 | 0.0962 | 0.4458           | 5.2458 | 0.0850 | 0.5805            | 5.0023 | 0.1161 |
| <i>Nilaparvata lugens</i> (Guangdong, China)                   | 0.4901 | 5.0697 | 0.0967 | 0.4464           | 5.2249 | 0.0854 | 0.5795            | 4.9611 | 0.1168 |
| <i>Nilaparvata lugens</i> (biotype 1, Zhejiang, China)         | 0.4937 | 4.9612 | 0.0995 | 0.4524           | 5.0719 | 0.0892 | 0.5789            | 4.9408 | 0.1172 |
| <i>Nilaparvata lugens</i> (biotype 2, Zhejiang, China)         | 0.4942 | 4.9490 | 0.0999 | 0.4527           | 5.0712 | 0.0893 | 0.5795            | 4.9213 | 0.1178 |
| <i>Nilaparvata lugens</i> (biotype 3, Zhejiang, China)         | 0.4939 | 4.9437 | 0.0999 | 0.4525           | 5.0661 | 0.0893 | 0.5793            | 4.9196 | 0.1178 |
| <i>Nilaparvata mui</i>                                         | 0.4892 | 4.8592 | 0.1007 | 0.4519           | 4.8506 | 0.0932 | 0.5664            | 5.0748 | 0.1116 |
| <i>Nilaparvata</i> sp.                                         | 0.4953 | 5.0703 | 0.0977 | 0.4535           | 5.2758 | 0.0860 | 0.5887            | 5.1242 | 0.1149 |
| <i>Peregrinus maidis</i>                                       | 0.4951 | 4.8830 | 0.1014 | 0.4531           | 5.1592 | 0.0878 | 0.5943            | 4.8054 | 0.1237 |
| <i>Sogatella furcifera</i> (Hainan, China)                     | 0.4981 | 4.9242 | 0.1012 | 0.4539           | 4.9761 | 0.0912 | 0.5820            | 5.1253 | 0.1136 |
| <i>Sogatella furcifera</i> (Yunnan, China)                     | 0.4982 | 4.9208 | 0.1012 | 0.4543           | 4.9664 | 0.0915 | 0.5806            | 5.1508 | 0.1127 |
| <i>Sogatella vibix</i>                                         | 0.4936 | 5.1024 | 0.0967 | 0.4512           | 5.2516 | 0.0859 | 0.5904            | 5.2355 | 0.1128 |
| <i>Laodelphax striatellus</i> (Jiangsu, China)                 | 0.5023 | 5.0074 | 0.1003 | 0.4559           | 5.1709 | 0.0882 | 0.6017            | 5.1664 | 0.1165 |
| <i>Laodelphax striatella</i> (Suwon, Korea)                    | 0.5025 | 5.0221 | 0.1001 | 0.4568           | 5.1844 | 0.0881 | 0.5992            | 5.1809 | 0.1156 |
| <i>Laodelphax striatella</i> (Milyang, Korea)                  | 0.5025 | 5.0221 | 0.1001 | 0.4568           | 5.1844 | 0.0881 | 0.5992            | 5.1809 | 0.1156 |
| <i>Laodelphax striatellus</i> A1 (China)                       | 0.5040 | 5.0036 | 0.1007 | 0.4584           | 5.1657 | 0.0887 | 0.5998            | 5.1864 | 0.1157 |
| <i>Laodelphax striatellus</i> B1 (China)                       | 0.5040 | 4.9958 | 0.1009 | 0.4582           | 5.1596 | 0.0888 | 0.6005            | 5.1681 | 0.1162 |
| <i>Laodelphax striatellus</i> (Beijing, China)                 | 0.5082 | 4.9734 | 0.1022 | 0.4611           | 5.1952 | 0.0888 | 0.6165            | 4.9848 | 0.1237 |

| Species                                                        | ATP8   |        |        | ATP6   |        |        | COI    |        |        |
|----------------------------------------------------------------|--------|--------|--------|--------|--------|--------|--------|--------|--------|
|                                                                | Ka     | Ks     | Ka/Ks  | Ka     | Ks     | Ka/Ks  | Ka     | Ks     | Ka/Ks  |
| <b>Fulgoroidea</b>                                             |        |        |        |        |        |        |        |        |        |
| <b>Flatidae</b>                                                |        |        |        |        |        |        |        |        |        |
| Flatinae                                                       |        |        |        |        |        |        |        |        |        |
| <i>Metcalfa pruinosa</i> (H1)                                  | 0.8789 | 1.7498 | 0.5023 | 0.5453 | 4.2239 | 0.1291 | 0.2301 | 5.1599 | 0.0446 |
| <i>Metcalfa pruinosa</i> (H3)                                  | 0.8789 | 1.7498 | 0.5023 | 0.5544 | 4.1406 | 0.1339 | 0.2301 | 5.1519 | 0.0447 |
| <i>Salurnis marginella</i>                                     | 0.7011 | 2.9817 | 0.2352 | 0.5487 | 3.8436 | 0.1427 | 0.2248 | 4.8735 | 0.0461 |
| <i>Geisha distinctissima</i>                                   | 0.9353 | 1.3676 | 0.6839 | 0.5114 | 4.2204 | 0.1212 | 0.2150 | 4.7884 | 0.0449 |
| <b>Fulgoridae</b>                                              |        |        |        |        |        |        |        |        |        |
| Fulgorinae                                                     |        |        |        |        |        |        |        |        |        |
| <i>Pyrops candelaria</i>                                       | 0.8672 | 2.0296 | 0.4273 | 0.5217 | 3.7945 | 0.1375 | 0.2266 | 4.5304 | 0.0500 |
| Aphaeninae                                                     |        |        |        |        |        |        |        |        |        |
| <i>Lycorma delicatula</i> (Henan, China)                       | 0.8015 | 2.7124 | 0.2955 | 0.5125 | 4.5942 | 0.1115 | 0.2175 | 5.1387 | 0.0423 |
| <i>Lycorma delicatula</i> (China)                              | 0.8068 | 2.6297 | 0.3068 | 0.5078 | 4.6108 | 0.1101 | 0.2144 | 5.1156 | 0.0419 |
| <i>Lycorma delicatula</i> (Korea)                              | 0.8015 | 2.7124 | 0.2955 | 0.5132 | 4.5807 | 0.1120 | 0.2144 | 5.1205 | 0.0419 |
| <i>Aphaena</i> ( <i>Callidepsa</i> ) <i>amabilis</i>           | 0.8276 | 2.5799 | 0.3208 | 0.5227 | 4.0185 | 0.1301 | 0.2200 | 5.2626 | 0.0418 |
| <i>Aphaena</i> ( <i>Aphaena</i> ) <i>discolor nigrotibiata</i> | 0.8130 | 2.8495 | 0.2853 | 0.5441 | 3.9249 | 0.1386 | 0.2215 | 5.1727 | 0.0428 |
| <b>Achilidae</b>                                               |        |        |        |        |        |        |        |        |        |
| Achilinae                                                      |        |        |        |        |        |        |        |        |        |
| <i>Betatropis formosana</i>                                    | 0.8889 | 1.9448 | 0.4571 | 0.5294 | 4.1372 | 0.1280 | 0.2194 | 5.1782 | 0.0424 |
| <i>Magadhaideus luodiana</i> sp. nov                           | 0.9384 | 1.4368 | 0.6531 | 0.5532 | 3.5620 | 0.1553 | 0.2154 | 4.7026 | 0.0458 |
| <i>Peltatavertexalis horizontalis</i> sp. nov                  | 0.9228 | 1.4273 | 0.6465 | 0.5896 | 3.4019 | 0.1733 | 0.2100 | 4.9360 | 0.0425 |
| <i>Plectoderini</i> sp.                                        | 0.8304 | 2.3338 | 0.3558 | 0.5728 | 3.5138 | 0.1630 | 0.2240 | 4.7597 | 0.0471 |
| <i>Paracatonidia</i> sp.                                       | 0.8600 | 2.0116 | 0.4275 | 0.5107 | 4.1834 | 0.1221 | 0.2087 | 5.1917 | 0.0402 |
| <b>Cixiidae</b>                                                |        |        |        |        |        |        |        |        |        |
| Cixiinae                                                       |        |        |        |        |        |        |        |        |        |
| <i>Pentastiridius</i> sp.                                      | 0.8155 | 2.1343 | 0.3821 | 0.5317 | 4.1018 | 0.1296 | 0.2044 | 5.3338 | 0.0383 |
| <b>Derbidae</b>                                                |        |        |        |        |        |        |        |        |        |
| Otiocerinae                                                    |        |        |        |        |        |        |        |        |        |
| <i>Lydda</i> sp.                                               | 0.7579 | 3.0301 | 0.2501 | 0.5674 | 3.9737 | 0.1428 | 0.2236 | 5.2817 | 0.0423 |
| <b>Issidae</b>                                                 |        |        |        |        |        |        |        |        |        |
| Issinae                                                        |        |        |        |        |        |        |        |        |        |
| <i>Sivaloka damnosus</i>                                       | 0.7246 | 2.6240 | 0.2761 | 0.5848 | 3.6503 | 0.1602 | 0.2674 | 5.0122 | 0.0534 |
| <i>Sivaloka</i> sp.                                            | 0.7267 | 2.4713 | 0.2941 | 0.5192 | 4.5070 | 0.1152 | 0.2180 | 5.1082 | 0.0427 |
| <b>Ricaniidae</b>                                              |        |        |        |        |        |        |        |        |        |
| Ricaniinae                                                     |        |        |        |        |        |        |        |        |        |
| <i>Ricania marginalis</i>                                      | 0.8037 | 2.5821 | 0.3113 | 0.5569 | 4.0062 | 0.1390 | 0.2258 | 4.8422 | 0.0466 |
| <i>Ricania speculum</i>                                        | 0.8207 | 2.5655 | 0.3199 | 0.5495 | 4.0232 | 0.1366 | 0.2155 | 4.9293 | 0.0437 |
| <b>Delphacidae</b>                                             |        |        |        |        |        |        |        |        |        |
| Asiracinae                                                     |        |        |        |        |        |        |        |        |        |
| <i>Ugyops</i> sp.                                              | 0.7768 | 2.7516 | 0.2823 | 0.4680 | 4.6823 | 0.1000 | 0.2183 | 5.1886 | 0.0421 |
| Delphacinae                                                    |        |        |        |        |        |        |        |        |        |
| Saccharosydmini                                                |        |        |        |        |        |        |        |        |        |
| <i>Saccharosydne procerus</i>                                  | 0.7795 | 2.2144 | 0.3520 | 0.5376 | 4.5807 | 0.1174 | 0.2014 | 5.3935 | 0.0373 |
| Delphacini                                                     |        |        |        |        |        |        |        |        |        |
| <i>Changeondelphax velitchkovskyi</i>                          | 0.8500 | 2.1680 | 0.3921 | 0.5797 | 3.4795 | 0.1666 | 0.2003 | 4.8812 | 0.0410 |
| <i>Nilaparvata bakeri</i> (unknown)                            | 0.7999 | 2.7394 | 0.2920 | 0.5941 | 3.8231 | 0.1554 | 0.1937 | 5.1913 | 0.0373 |
| <i>Nilaparvata lugens</i> (biotype Y, Zhejiang, China)         | 0.7351 | 2.9447 | 0.2496 | 0.5974 | 3.7525 | 0.1592 | 0.2004 | 5.0720 | 0.0395 |
| <i>Nilaparvata lugens</i> (biotype L, Zhejiang, China)         | 0.7351 | 2.9447 | 0.2496 | 0.5997 | 3.7079 | 0.1617 | 0.2016 | 5.0870 | 0.0396 |
| <i>Nilaparvata lugens</i> (Hainan, China)                      | 0.7351 | 2.9447 | 0.2496 | 0.5989 | 3.7086 | 0.1615 | 0.1990 | 5.0934 | 0.0391 |
| <i>Nilaparvata lugens</i> (Hadong-gun, Korea)                  | 0.7351 | 2.9447 | 0.2496 | 0.5957 | 3.7284 | 0.1598 | 0.2010 | 5.0726 | 0.0396 |
| <i>Nilaparvata lugens</i> (Guangdong, China)                   | 0.7351 | 2.9447 | 0.2496 | 0.5989 | 3.7086 | 0.1615 | 0.2010 | 5.0726 | 0.0396 |
| <i>Nilaparvata lugens</i> (biotype 1, Zhejiang, China)         | 0.7351 | 2.9447 | 0.2496 | 0.5997 | 3.7079 | 0.1617 | 0.2004 | 5.0720 | 0.0395 |
| <i>Nilaparvata lugens</i> (biotype 2, Zhejiang, China)         | 0.7351 | 2.9447 | 0.2496 | 0.5980 | 3.7281 | 0.1604 | 0.2017 | 5.0794 | 0.0397 |
| <i>Nilaparvata lugens</i> (biotype 3, Zhejiang, China)         | 0.7351 | 2.9447 | 0.2496 | 0.5993 | 3.7069 | 0.1617 | 0.2004 | 5.0720 | 0.0395 |
| <i>Nilaparvata mui</i>                                         | 0.7793 | 2.8162 | 0.2767 | 0.6161 | 3.3142 | 0.1859 | 0.1957 | 4.9230 | 0.0398 |
| <i>Nilaparvata</i> sp.                                         | 0.7441 | 2.8348 | 0.2625 | 0.5856 | 3.5859 | 0.1633 | 0.2152 | 4.9445 | 0.0435 |
| <i>Peregrinus maidis</i>                                       | 0.8022 | 2.7892 | 0.2876 | 0.5808 | 3.5448 | 0.1639 | 0.2030 | 5.0741 | 0.0400 |
| <i>Sogatella furcifera</i> (Hainan, China)                     | 0.7494 | 2.6893 | 0.2787 | 0.5592 | 3.7511 | 0.1491 | 0.2010 | 4.6867 | 0.0429 |
| <i>Sogatella furcifera</i> (Yunnan, China)                     | 0.7494 | 2.6893 | 0.2787 | 0.5592 | 3.7511 | 0.1491 | 0.2010 | 4.6886 | 0.0429 |
| <i>Sogatella vibix</i>                                         | 0.7393 | 2.4768 | 0.2985 | 0.5620 | 4.1048 | 0.1369 | 0.2018 | 4.7887 | 0.0421 |
| <i>Laodelphax striatellus</i> (Jiangsu, China)                 | 0.8238 | 2.7494 | 0.2996 | 0.5993 | 3.5119 | 0.1707 | 0.1879 | 5.0591 | 0.0371 |
| <i>Laodelphax striatella</i> (Suwon, Korea)                    | 0.8238 | 2.7494 | 0.2996 | 0.6014 | 3.5046 | 0.1716 | 0.1895 | 5.0512 | 0.0375 |
| <i>Laodelphax striatella</i> (Milyang, Korea)                  | 0.8238 | 2.7494 | 0.2996 | 0.6014 | 3.5046 | 0.1716 | 0.1895 | 5.0512 | 0.0375 |
| <i>Laodelphax striatellus</i> A1 (China)                       | 0.8345 | 2.7817 | 0.3000 | 0.6003 | 3.5082 | 0.1711 | 0.1911 | 4.9829 | 0.0384 |
| <i>Laodelphax striatellus</i> B1 (China)                       | 0.8238 | 2.7494 | 0.2996 | 0.6033 | 3.4904 | 0.1728 | 0.1910 | 5.0091 | 0.0381 |
| <i>Laodelphax striatellus</i> (Beijing, China)                 | 0.7710 | 2.8706 | 0.2686 | 0.6033 | 3.4806 | 0.1733 | 0.1911 | 4.9829 | 0.0384 |

| Species                                                        | COII   |        |        | COIII  |        |        | CytB   |        |        |
|----------------------------------------------------------------|--------|--------|--------|--------|--------|--------|--------|--------|--------|
|                                                                | Ka     | Ks     | Ka/Ks  | Ka     | Ks     | Ka/Ks  | Ka     | Ks     | Ka/Ks  |
| <b>Fulgoroidea</b>                                             |        |        |        |        |        |        |        |        |        |
| <b>Flatidae</b>                                                |        |        |        |        |        |        |        |        |        |
| Flatinae                                                       |        |        |        |        |        |        |        |        |        |
| <i>Metcalfa pruinosa</i> (H1)                                  | 0.5281 | 4.3420 | 0.1216 | 0.2950 | 5.2737 | 0.0559 | 0.3262 | 3.5787 | 0.0911 |
| <i>Metcalfa pruinosa</i> (H3)                                  | 0.5281 | 4.3420 | 0.1216 | 0.2950 | 5.2737 | 0.0559 | 0.3264 | 3.5844 | 0.0911 |
| <i>Salurnis marginella</i>                                     | 0.4753 | 4.5306 | 0.1049 | 0.3221 | 5.0634 | 0.0636 | 0.3124 | 3.5300 | 0.0885 |
| <i>Geisha distinctissima</i>                                   | 0.4958 | 4.1545 | 0.1193 | 0.3327 | 5.3099 | 0.0627 | 0.3513 | 3.3519 | 0.1048 |
| <b>Fulgoridae</b>                                              |        |        |        |        |        |        |        |        |        |
| Fulgorinae                                                     |        |        |        |        |        |        |        |        |        |
| <i>Pyrops candelaria</i>                                       | 0.5185 | 4.1031 | 0.1264 | 0.3429 | 4.9884 | 0.0687 | 0.3647 | 3.2293 | 0.1129 |
| Aphaeninae                                                     |        |        |        |        |        |        |        |        |        |
| <i>Lycorma delicatula</i> (Henan, China)                       | 0.4892 | 4.2325 | 0.1156 | 0.3578 | 5.3375 | 0.0670 | 0.3471 | 3.4206 | 0.1015 |
| <i>Lycorma delicatula</i> (China)                              | 0.4898 | 4.1960 | 0.1167 | 0.3545 | 5.2899 | 0.0670 | 0.3453 | 3.4466 | 0.1002 |
| <i>Lycorma delicatula</i> (Korea)                              | 0.4892 | 4.2325 | 0.1156 | 0.3545 | 5.2899 | 0.0670 | 0.3364 | 3.4824 | 0.0966 |
| <i>Aphaena</i> ( <i>Callidepsa</i> ) <i>amabilis</i>           | 0.5020 | 4.4094 | 0.1138 | 0.3650 | 5.1453 | 0.0709 | 0.3336 | 3.6326 | 0.0918 |
| <i>Aphaena</i> ( <i>Aphaena</i> ) <i>discolor nigrotibiata</i> | 0.5160 | 4.0752 | 0.1266 | 0.3752 | 5.2040 | 0.0721 | 0.3238 | 3.6367 | 0.0890 |
| <b>Achilidae</b>                                               |        |        |        |        |        |        |        |        |        |
| Achilinae                                                      |        |        |        |        |        |        |        |        |        |
| <i>Betatropis formosana</i>                                    | 0.4961 | 4.2799 | 0.1159 | 0.3501 | 5.6812 | 0.0616 | 0.3137 | 3.7225 | 0.0843 |
| <i>Magadhaideus luodiana</i> sp. nov                           | 0.4882 | 4.1130 | 0.1187 | 0.3696 | 4.6259 | 0.0799 | 0.3203 | 3.3723 | 0.0950 |
| <i>Peltatavertexalis horizontalis</i> sp. nov                  | 0.4614 | 4.6407 | 0.0994 | 0.3539 | 5.3724 | 0.0659 | 0.3328 | 3.4847 | 0.0955 |
| <i>Plectoderini</i> sp.                                        | 0.5097 | 3.7807 | 0.1348 | 0.3544 | 4.5905 | 0.0772 | 0.3329 | 3.4665 | 0.0960 |
| <i>Paracatonidia</i> sp.                                       | 0.4626 | 4.6754 | 0.0989 | 0.3408 | 5.2768 | 0.0646 | 0.3349 | 3.5229 | 0.0951 |
| <b>Cixiidae</b>                                                |        |        |        |        |        |        |        |        |        |
| Cixiinae                                                       |        |        |        |        |        |        |        |        |        |
| <i>Pentastiridius</i> sp.                                      | 0.4759 | 4.9587 | 0.0960 | 0.3684 | 5.0953 | 0.0723 | 0.3029 | 3.6567 | 0.0828 |
| <b>Derbidae</b>                                                |        |        |        |        |        |        |        |        |        |
| Otiocerinae                                                    |        |        |        |        |        |        |        |        |        |
| <i>Lydda</i> sp.                                               | 0.5422 | 4.1631 | 0.1302 | 0.3841 | 4.9201 | 0.0781 | 0.3219 | 3.7927 | 0.0849 |
| <b>Issidae</b>                                                 |        |        |        |        |        |        |        |        |        |
| Issinae                                                        |        |        |        |        |        |        |        |        |        |
| <i>Sivaloka damnosus</i>                                       | 0.4597 | 4.2923 | 0.1071 | 0.3464 | 5.3822 | 0.0644 | 0.3186 | 3.6038 | 0.0884 |
| <i>Sivaloka</i> sp.                                            | 0.4606 | 4.2368 | 0.1087 | 0.3390 | 4.9745 | 0.0681 | 0.2973 | 3.6556 | 0.0813 |
| <b>Ricaniidae</b>                                              |        |        |        |        |        |        |        |        |        |
| Ricaniinae                                                     |        |        |        |        |        |        |        |        |        |
| <i>Ricania marginalis</i>                                      | 0.4710 | 4.9596 | 0.0950 | 0.3277 | 5.1898 | 0.0631 | 0.3484 | 3.5951 | 0.0969 |
| <i>Ricania speculum</i>                                        | 0.4618 | 5.0527 | 0.0914 | 0.3301 | 5.1930 | 0.0636 | 0.3174 | 3.5137 | 0.0903 |
| <b>Delphacidae</b>                                             |        |        |        |        |        |        |        |        |        |
| Asiracinae                                                     |        |        |        |        |        |        |        |        |        |
| <i>Ugyops</i> sp.                                              | 0.5223 | 4.4860 | 0.1164 | 0.3597 | 5.1603 | 0.0697 | 0.3213 | 3.7920 | 0.0847 |
| Delphacinae                                                    |        |        |        |        |        |        |        |        |        |
| Saccharosydmini                                                |        |        |        |        |        |        |        |        |        |
| <i>Saccharosydne procerus</i>                                  | 0.4763 | 4.8727 | 0.0977 | 0.3824 | 5.1200 | 0.0747 | 0.3143 | 3.9716 | 0.0791 |
| Delphacini                                                     |        |        |        |        |        |        |        |        |        |
| <i>Changeodelphax velitchkovskyi</i>                           | 0.5254 | 3.8401 | 0.1368 | 0.3862 | 4.9547 | 0.0780 | 0.3167 | 3.4521 | 0.0917 |
| <i>Nilaparvata bakeri</i> (unknown)                            | 0.4747 | 4.5709 | 0.1039 | 0.3727 | 5.0557 | 0.0737 | 0.2832 | 3.7544 | 0.0754 |
| <i>Nilaparvata lugens</i> (biotype Y, Zhejiang, China)         | 0.4842 | 4.3702 | 0.1108 | 0.3835 | 4.5503 | 0.0843 | 0.2740 | 3.7208 | 0.0737 |
| <i>Nilaparvata lugens</i> (biotype L, Zhejiang, China)         | 0.4843 | 4.3972 | 0.1101 | 0.3839 | 4.6101 | 0.0833 | 0.2748 | 3.7236 | 0.0738 |
| <i>Nilaparvata lugens</i> (Hainan, China)                      | 0.4843 | 4.3972 | 0.1101 | 0.3853 | 4.5231 | 0.0852 | 0.2747 | 3.7310 | 0.0736 |
| <i>Nilaparvata lugens</i> (Hadong-gun, Korea)                  | 0.4842 | 4.4271 | 0.1094 | 0.3846 | 4.5634 | 0.0843 | 0.2743 | 3.7475 | 0.0732 |
| <i>Nilaparvata lugens</i> (Guangdong, China)                   | 0.4843 | 4.3972 | 0.1101 | 0.3853 | 4.5231 | 0.0852 | 0.2763 | 3.7496 | 0.0737 |
| <i>Nilaparvata lugens</i> (biotype 1, Zhejiang, China)         | 0.4842 | 4.3702 | 0.1108 | 0.3835 | 4.5503 | 0.0843 | 0.2747 | 3.7310 | 0.0736 |
| <i>Nilaparvata lugens</i> (biotype 2, Zhejiang, China)         | 0.4843 | 4.3972 | 0.1101 | 0.3835 | 4.5503 | 0.0843 | 0.2747 | 3.7310 | 0.0736 |
| <i>Nilaparvata lugens</i> (biotype 3, Zhejiang, China)         | 0.4843 | 4.3972 | 0.1101 | 0.3877 | 4.5124 | 0.0859 | 0.2747 | 3.7310 | 0.0736 |
| <i>Nilaparvata mui</i>                                         | 0.4704 | 4.3696 | 0.1076 | 0.3798 | 4.7788 | 0.0795 | 0.2763 | 3.6498 | 0.0757 |
| <i>Nilaparvata</i> sp.                                         | 0.4926 | 4.5392 | 0.1085 | 0.3968 | 4.5164 | 0.0879 | 0.2882 | 3.7603 | 0.0767 |
| <i>Peregrinus maidis</i>                                       | 0.4946 | 4.4142 | 0.1120 | 0.4176 | 4.6882 | 0.0891 | 0.3135 | 3.7649 | 0.0833 |
| <i>Sogatella furcifera</i> (Hainan, China)                     | 0.5038 | 4.3015 | 0.1171 | 0.3824 | 4.7262 | 0.0809 | 0.2978 | 3.7939 | 0.0785 |
| <i>Sogatella furcifera</i> (Yunnan, China)                     | 0.5038 | 4.3015 | 0.1171 | 0.3863 | 4.7097 | 0.0820 | 0.2980 | 3.7851 | 0.0787 |
| <i>Sogatella vibix</i>                                         | 0.4966 | 4.7401 | 0.1048 | 0.3909 | 4.8843 | 0.0800 | 0.2900 | 4.0531 | 0.0715 |
| <i>Laodelphax striatellus</i> (Jiangsu, China)                 | 0.4804 | 4.3784 | 0.1097 | 0.3884 | 5.1321 | 0.0757 | 0.2713 | 3.9399 | 0.0688 |
| <i>Laodelphax striatella</i> (Suwon, Korea)                    | 0.4792 | 4.4180 | 0.1085 | 0.3883 | 5.1559 | 0.0753 | 0.2698 | 3.9587 | 0.0681 |
| <i>Laodelphax striatella</i> (Milyang, Korea)                  | 0.4792 | 4.4180 | 0.1085 | 0.3883 | 5.1559 | 0.0753 | 0.2698 | 3.9587 | 0.0681 |
| <i>Laodelphax striatellus</i> A1 (China)                       | 0.4891 | 4.3286 | 0.1130 | 0.3883 | 5.1225 | 0.0758 | 0.2690 | 3.9498 | 0.0681 |
| <i>Laodelphax striatellus</i> B1 (China)                       | 0.4879 | 4.3311 | 0.1127 | 0.3886 | 5.1646 | 0.0752 | 0.2711 | 3.9401 | 0.0688 |
| <i>Laodelphax striatellus</i> (Beijing, China)                 | 0.4806 | 4.4657 | 0.1076 | 0.3883 | 5.1225 | 0.0758 | 0.2676 | 3.9605 | 0.0676 |

| Species                                                        | ND1    |        |        | ND2    |        |        | ND3    |        |        |
|----------------------------------------------------------------|--------|--------|--------|--------|--------|--------|--------|--------|--------|
|                                                                | Ka     | Ks     | Ka/Ks  | Ka     | Ks     | Ka/Ks  | Ka     | Ks     | Ka/Ks  |
| <b>Fulgoroidea</b>                                             |        |        |        |        |        |        |        |        |        |
| <b>Flatidae</b>                                                |        |        |        |        |        |        |        |        |        |
| Flatinae                                                       |        |        |        |        |        |        |        |        |        |
| <i>Metcalfa pruinosa</i> (H1)                                  | 0.7433 | 2.9953 | 0.2482 | 0.7381 | 2.7699 | 0.2665 | 0.5795 | 4.0748 | 0.1422 |
| <i>Metcalfa pruinosa</i> (H3)                                  | 0.7433 | 2.9953 | 0.2482 | 0.7364 | 2.7867 | 0.2643 | 0.5795 | 4.0748 | 0.1422 |
| <i>Salurnis marginella</i>                                     | 0.7625 | 2.9579 | 0.2578 | 0.7856 | 2.6485 | 0.2966 | 0.7215 | 3.0602 | 0.2358 |
| <i>Geisha distinctissima</i>                                   | 0.7680 | 2.5742 | 0.2984 | 0.7523 | 2.5583 | 0.2941 | 0.5847 | 4.4094 | 0.1326 |
| <b>Fulgoridae</b>                                              |        |        |        |        |        |        |        |        |        |
| Fulgorinae                                                     |        |        |        |        |        |        |        |        |        |
| <i>Pyrops candelaria</i>                                       | 0.7569 | 2.7323 | 0.2770 | 0.7531 | 2.5694 | 0.2931 | 0.7535 | 2.9102 | 0.2589 |
| Aphaeninae                                                     |        |        |        |        |        |        |        |        |        |
| <i>Lycorma delicatula</i> (Henan, China)                       | 0.7342 | 3.2810 | 0.2238 | 0.7852 | 2.5417 | 0.3089 | 0.7182 | 2.7934 | 0.2571 |
| <i>Lycorma delicatula</i> (China)                              | 0.7275 | 3.2746 | 0.2222 | 0.7836 | 2.5761 | 0.3042 | 0.6621 | 3.4249 | 0.1933 |
| <i>Lycorma delicatula</i> (Korea)                              | 0.7275 | 3.2746 | 0.2222 | 0.7836 | 2.5761 | 0.3042 | 0.6621 | 3.4249 | 0.1933 |
| <i>Aphaena</i> ( <i>Callidepsa</i> ) <i>amabilis</i>           | 0.7287 | 3.6783 | 0.1981 | 0.7626 | 2.9359 | 0.2598 | 0.7012 | 3.3337 | 0.2103 |
| <i>Aphaena</i> ( <i>Aphaena</i> ) <i>discolor nigrotibiata</i> | 0.7192 | 3.3786 | 0.2129 | 0.7953 | 2.6605 | 0.2989 | 0.6022 | 4.2790 | 0.1407 |
| <b>Achilidae</b>                                               |        |        |        |        |        |        |        |        |        |
| Achilinae                                                      |        |        |        |        |        |        |        |        |        |
| <i>Betatropis formosana</i>                                    | 0.7389 | 3.1962 | 0.2312 | 0.7505 | 2.8243 | 0.2657 | 0.6409 | 3.8930 | 0.1646 |
| <i>Magadhaideus luodiana</i> sp. nov                           | 0.7511 | 2.6784 | 0.2804 | 0.7204 | 2.7537 | 0.2616 | 0.5454 | 3.9422 | 0.1384 |
| <i>Peltatavertexalis horizontalis</i> sp. nov                  | 0.7471 | 2.6753 | 0.2793 | 0.7879 | 2.3755 | 0.3317 | 0.6361 | 3.8830 | 0.1638 |
| <i>Plectoderini</i> sp.                                        | 0.7663 | 2.8645 | 0.2675 | 0.7201 | 3.0515 | 0.2360 | 0.6348 | 3.5247 | 0.1801 |
| <i>Paracatonidia</i> sp.                                       | 0.7289 | 3.2385 | 0.2251 | 0.7325 | 3.0017 | 0.2440 | 0.5836 | 3.7848 | 0.1542 |
| <b>Cixiidae</b>                                                |        |        |        |        |        |        |        |        |        |
| Cixiinae                                                       |        |        |        |        |        |        |        |        |        |
| <i>Pentastiridius</i> sp.                                      | -      | -      | -      | 0.8215 | 2.3527 | 0.3492 | 0.7140 | 3.1575 | 0.2261 |
| <b>Derbidae</b>                                                |        |        |        |        |        |        |        |        |        |
| Otiocerinae                                                    |        |        |        |        |        |        |        |        |        |
| <i>Lydda</i> sp.                                               | 0.7295 | 3.1217 | 0.2337 | 0.6995 | 3.1414 | 0.2227 | 0.5963 | 4.2188 | 0.1413 |
| <b>Issidae</b>                                                 |        |        |        |        |        |        |        |        |        |
| Issinae                                                        |        |        |        |        |        |        |        |        |        |
| <i>Sivaloka damnosus</i>                                       | 0.7698 | 2.5477 | 0.3022 | 0.7788 | 2.4506 | 0.3178 | 0.5957 | 3.6781 | 0.1619 |
| <i>Sivaloka</i> sp.                                            | 0.7464 | 2.8770 | 0.2594 | 0.7283 | 2.9694 | 0.2453 | 0.6102 | 3.9104 | 0.1560 |
| <b>Ricaniidae</b>                                              |        |        |        |        |        |        |        |        |        |
| Ricaniinae                                                     |        |        |        |        |        |        |        |        |        |
| <i>Ricania marginalis</i>                                      | 0.7965 | 2.3493 | 0.3391 | 0.7897 | 2.5311 | 0.3120 | 0.6009 | 3.5970 | 0.1671 |
| <i>Ricania speculum</i>                                        | 0.7497 | 3.0184 | 0.2484 | 0.7174 | 2.7608 | 0.2598 | 0.5905 | 3.6965 | 0.1598 |
| <b>Delphacidae</b>                                             |        |        |        |        |        |        |        |        |        |
| Asiracinae                                                     |        |        |        |        |        |        |        |        |        |
| <i>Ugyops</i> sp.                                              | 0.7173 | 3.7132 | 0.1932 | 0.7716 | 3.1038 | 0.2486 | 0.7029 | 3.4375 | 0.2045 |
| Delphacinae                                                    |        |        |        |        |        |        |        |        |        |
| Saccharosydmini                                                |        |        |        |        |        |        |        |        |        |
| <i>Saccharosydne procerus</i>                                  | 0.7869 | 3.1631 | 0.2488 | 0.7697 | 3.1352 | 0.2455 | 0.6566 | 3.9879 | 0.1647 |
| Delphacini                                                     |        |        |        |        |        |        |        |        |        |
| <i>Changeondelphax velitchkovskyi</i>                          | 0.8250 | 2.2407 | 0.3682 | 0.7390 | 2.7437 | 0.2693 | 0.6240 | 3.7289 | 0.1673 |
| <i>Nilaparvata bakeri</i> (unknown)                            | 0.7865 | 2.7383 | 0.2872 | 0.6849 | 3.0876 | 0.2218 | 0.8576 | 1.6783 | 0.5110 |
| <i>Nilaparvata lugens</i> (biotype Y, Zhejiang, China)         | 0.7792 | 2.6582 | 0.2931 | 0.6978 | 2.9752 | 0.2345 | 0.8345 | 1.7986 | 0.4640 |
| <i>Nilaparvata lugens</i> (biotype L, Zhejiang, China)         | 0.7792 | 2.6582 | 0.2931 | 0.6972 | 2.9932 | 0.2329 | 0.8351 | 1.8192 | 0.4590 |
| <i>Nilaparvata lugens</i> (Hainan, China)                      | 0.7696 | 2.7356 | 0.2813 | 0.7060 | 2.8638 | 0.2465 | 0.6171 | 4.2903 | 0.1438 |
| <i>Nilaparvata lugens</i> (Hadong-gun, Korea)                  | 0.7890 | 2.6178 | 0.3014 | 0.6903 | 3.0320 | 0.2277 | 0.6171 | 4.2903 | 0.1438 |
| <i>Nilaparvata lugens</i> (Guangdong, China)                   | 0.7781 | 2.6793 | 0.2904 | 0.6903 | 3.0320 | 0.2277 | 0.6171 | 4.2903 | 0.1438 |
| <i>Nilaparvata lugens</i> (biotype 1, Zhejiang, China)         | 0.7792 | 2.6582 | 0.2931 | 0.6978 | 2.9752 | 0.2345 | 0.8345 | 1.7986 | 0.4640 |
| <i>Nilaparvata lugens</i> (biotype 2, Zhejiang, China)         | 0.7792 | 2.6582 | 0.2931 | 0.7002 | 2.9676 | 0.2359 | 0.8345 | 1.7986 | 0.4640 |
| <i>Nilaparvata lugens</i> (biotype 3, Zhejiang, China)         | 0.7789 | 2.6420 | 0.2948 | 0.6986 | 2.9795 | 0.2345 | 0.8345 | 1.7986 | 0.4640 |
| <i>Nilaparvata mui</i>                                         | 0.7698 | 2.9717 | 0.2590 | 0.7095 | 2.8354 | 0.2502 | 0.8427 | 1.7448 | 0.4830 |
| <i>Nilaparvata</i> sp.                                         | 0.7646 | 2.8362 | 0.2696 | 0.7501 | 2.9173 | 0.2571 | 0.6951 | 3.1758 | 0.2189 |
| <i>Peregrinus maidis</i>                                       | 0.7690 | 2.7189 | 0.2829 | 0.6995 | 3.1414 | 0.2227 | 0.6830 | 3.1383 | 0.2176 |
| <i>Sogatella furcifera</i> (Hainan, China)                     | 0.7503 | 2.8622 | 0.2621 | 0.7309 | 2.5883 | 0.2824 | 0.6465 | 3.6730 | 0.1760 |
| <i>Sogatella furcifera</i> (Yunnan, China)                     | 0.7503 | 2.8622 | 0.2621 | 0.7323 | 2.5749 | 0.2844 | 0.6465 | 3.6730 | 0.1760 |
| <i>Sogatella vibix</i>                                         | 0.7758 | 2.8903 | 0.2684 | 0.7323 | 2.7089 | 0.2703 | 0.6455 | 3.4690 | 0.1861 |
| <i>Laodelphax striatellus</i> (Jiangsu, China)                 | 0.7841 | 2.4796 | 0.3162 | 0.7917 | 2.4243 | 0.3266 | 0.7743 | 2.8012 | 0.2764 |
| <i>Laodelphax striatella</i> (Suwon, Korea)                    | 0.7797 | 2.5489 | 0.3059 | 0.7934 | 2.4198 | 0.3279 | 0.7743 | 2.8012 | 0.2764 |
| <i>Laodelphax striatella</i> (Milyang, Korea)                  | 0.7797 | 2.5489 | 0.3059 | 0.7934 | 2.4198 | 0.3279 | 0.7743 | 2.8012 | 0.2764 |
| <i>Laodelphax striatellus</i> A1 (China)                       | 0.7843 | 2.4818 | 0.3160 | 0.7919 | 2.4439 | 0.3240 | 0.7812 | 2.7258 | 0.2866 |
| <i>Laodelphax striatellus</i> B1 (China)                       | 0.7852 | 2.4948 | 0.3147 | 0.7934 | 2.4198 | 0.3279 | 0.7743 | 2.8012 | 0.2764 |
| <i>Laodelphax striatellus</i> (Beijing, China)                 | 0.7843 | 2.4818 | 0.3160 | 0.7889 | 2.4557 | 0.3213 | 0.7812 | 2.7258 | 0.2866 |

| Species                                                        | ND4    |        |        | ND4L   |        |        | ND5    |        |        |
|----------------------------------------------------------------|--------|--------|--------|--------|--------|--------|--------|--------|--------|
|                                                                | Ka     | Ks     | Ka/Ks  | Ka     | Ks     | Ka/Ks  | Ka     | Ks     | Ka/Ks  |
| <b>Fulgoroidea</b>                                             |        |        |        |        |        |        |        |        |        |
| <b>Flatidae</b>                                                |        |        |        |        |        |        |        |        |        |
| Flatinae                                                       |        |        |        |        |        |        |        |        |        |
| <i>Metcalfa pruinosa</i> (H1)                                  | 0.5568 | 5.7317 | 0.0971 | 0.7511 | 2.4527 | 0.3063 | 0.5655 | 5.8165 | 0.0972 |
| <i>Metcalfa pruinosa</i> (H3)                                  | 0.5568 | 5.7317 | 0.0971 | 0.7511 | 2.4527 | 0.3063 | 0.5665 | 5.8752 | 0.0964 |
| <i>Salurnis marginella</i>                                     | 0.5761 | 5.0915 | 0.1132 | 0.6801 | 3.3647 | 0.2021 | 0.5583 | 5.9332 | 0.0941 |
| <i>Geisha distinctissima</i>                                   | 0.5936 | 4.6408 | 0.1279 | 0.8935 | 2.8299 | 0.3157 | 0.6086 | 5.4935 | 0.1108 |
| <b>Fulgoridae</b>                                              |        |        |        |        |        |        |        |        |        |
| Fulgorinae                                                     |        |        |        |        |        |        |        |        |        |
| <i>Pyrops candelaria</i>                                       | 0.6262 | 4.2032 | 0.1490 | 0.9379 | 1.3262 | 0.7072 | 0.5491 | 5.3324 | 0.1030 |
| Aphaeninae                                                     |        |        |        |        |        |        |        |        |        |
| <i>Lycorma delicatula</i> (Henan, China)                       | 0.6187 | 5.3665 | 0.1153 | 0.7338 | 3.2573 | 0.2253 | 0.5789 | 5.8056 | 0.0997 |
| <i>Lycorma delicatula</i> (China)                              | 0.6141 | 5.3557 | 0.1147 | 0.7338 | 3.2573 | 0.2253 | 0.5045 | 6.5611 | 0.0769 |
| <i>Lycorma delicatula</i> (Korea)                              | 0.6121 | 5.4154 | 0.1130 | 0.7338 | 3.2573 | 0.2253 | 0.5030 | 6.6071 | 0.0761 |
| <i>Aphaena</i> ( <i>Callidepsa</i> ) <i>amabilis</i>           | 0.6021 | 5.8064 | 0.1037 | 0.7996 | 2.3507 | 0.3402 | 0.5249 | 6.3016 | 0.0833 |
| <i>Aphaena</i> ( <i>Aphaena</i> ) <i>discolor nigrotibiata</i> | 0.5995 | 5.2975 | 0.1132 | 0.8243 | 2.0809 | 0.3961 | 0.5382 | 6.3431 | 0.0848 |
| <b>Achilidae</b>                                               |        |        |        |        |        |        |        |        |        |
| Achilinae                                                      |        |        |        |        |        |        |        |        |        |
| <i>Betatropis formosana</i>                                    | 0.5549 | 5.5192 | 0.1005 | 0.8626 | 1.8636 | 0.4629 | 0.5603 | 5.6525 | 0.0991 |
| <i>Magadhaideus luodiana</i> sp. nov                           | 0.5833 | 4.3929 | 0.1328 | 0.7824 | 2.1692 | 0.3607 | 0.5487 | 5.1342 | 0.1069 |
| <i>Peltatavertexalis horizontalis</i> sp. nov                  | 0.6161 | 4.3607 | 0.1413 | 0.8200 | 2.2149 | 0.3702 | 0.5321 | 5.9514 | 0.0894 |
| <i>Plectoderini</i> sp.                                        | 0.5995 | 4.8404 | 0.1239 | 0.7772 | 2.4131 | 0.3221 | 0.5460 | 5.5023 | 0.0992 |
| <i>Paracatonidia</i> sp.                                       | 0.6098 | 4.9776 | 0.1225 | 0.7725 | 2.1490 | 0.3595 | 0.5560 | 6.1192 | 0.0909 |
| <b>Cixiidae</b>                                                |        |        |        |        |        |        |        |        |        |
| Cixiinae                                                       |        |        |        |        |        |        |        |        |        |
| <i>Pentastiridius</i> sp.                                      | 0.5935 | 4.8595 | 0.1221 | 0.7113 | 4.9334 | 0.1442 | 0.5215 | 5.2072 | 0.1002 |
| <b>Derbidae</b>                                                |        |        |        |        |        |        |        |        |        |
| Otiocerinae                                                    |        |        |        |        |        |        |        |        |        |
| <i>Lydda</i> sp.                                               | 0.5896 | 4.9327 | 0.1195 | 0.7422 | 2.5342 | 0.2929 | 0.5240 | 6.1825 | 0.0848 |
| <b>Issidae</b>                                                 |        |        |        |        |        |        |        |        |        |
| Issinae                                                        |        |        |        |        |        |        |        |        |        |
| <i>Sivaloka damnosus</i>                                       | 0.5862 | 4.5736 | 0.1282 | 0.8198 | 2.2727 | 0.3607 | 0.5829 | 5.4469 | 0.1070 |
| <i>Sivaloka</i> sp.                                            | 0.5545 | 4.9512 | 0.1120 | 0.8198 | 2.2727 | 0.3607 | 0.5331 | 6.2588 | 0.0852 |
| <b>Ricaniidae</b>                                              |        |        |        |        |        |        |        |        |        |
| Ricaniinae                                                     |        |        |        |        |        |        |        |        |        |
| <i>Ricania marginalis</i>                                      | 0.6460 | 3.7507 | 0.1722 | 0.7221 | 3.4670 | 0.2083 | 0.5512 | 5.5338 | 0.0996 |
| <i>Ricania speculum</i>                                        | 0.5875 | 4.6132 | 0.1274 | 0.7221 | 3.4670 | 0.2083 | 0.5239 | 5.9654 | 0.0878 |
| <b>Delphacidae</b>                                             |        |        |        |        |        |        |        |        |        |
| Asiracinae                                                     |        |        |        |        |        |        |        |        |        |
| <i>Ugyops</i> sp.                                              | 0.5868 | 6.0838 | 0.0964 | 0.7730 | 3.2046 | 0.2412 | 0.5429 | 6.4828 | 0.0837 |
| Delphacinae                                                    |        |        |        |        |        |        |        |        |        |
| Saccharosydmini                                                |        |        |        |        |        |        |        |        |        |
| <i>Saccharosydne procerus</i>                                  | 0.5760 | 5.1814 | 0.1112 | 0.7903 | 3.7234 | 0.2122 | 0.6082 | 4.8469 | 0.1255 |
| Delphacini                                                     |        |        |        |        |        |        |        |        |        |
| <i>Changeodelphax velitchkovskyi</i>                           | 0.6087 | 4.7942 | 0.1270 | 0.8070 | 2.6923 | 0.2997 | 0.6034 | 4.6229 | 0.1305 |
| <i>Nilaparvata bakeri</i> (unknown)                            | 0.5925 | 4.9115 | 0.1206 | 0.8492 | 2.1816 | 0.3893 | 0.5833 | 5.6170 | 0.1038 |
| <i>Nilaparvata lugens</i> (biotype Y, Zhejiang, China)         | 0.5915 | 4.4901 | 0.1317 | 0.8295 | 2.3812 | 0.3483 | 0.5862 | 5.5455 | 0.1057 |
| <i>Nilaparvata lugens</i> (biotype L, Zhejiang, China)         | 0.5927 | 4.4838 | 0.1322 | 0.8295 | 2.3812 | 0.3483 | 0.5870 | 5.5414 | 0.1059 |
| <i>Nilaparvata lugens</i> (Hainan, China)                      | 0.5877 | 4.5146 | 0.1302 | 0.8312 | 2.3877 | 0.3481 | 0.5875 | 5.5253 | 0.1063 |
| <i>Nilaparvata lugens</i> (Hadong-gun, Korea)                  | 0.5874 | 4.5575 | 0.1289 | 0.8295 | 2.3812 | 0.3483 | 0.5867 | 5.5770 | 0.1052 |
| <i>Nilaparvata lugens</i> (Guangdong, China)                   | 0.5877 | 4.5146 | 0.1302 | 0.8183 | 2.4768 | 0.3304 | 0.5881 | 5.5481 | 0.1060 |
| <i>Nilaparvata lugens</i> (biotype 1, Zhejiang, China)         | 0.5912 | 4.5102 | 0.1311 | 0.8295 | 2.3812 | 0.3483 | 0.5862 | 5.5455 | 0.1057 |
| <i>Nilaparvata lugens</i> (biotype 2, Zhejiang, China)         | 0.5915 | 4.4901 | 0.1317 | 0.8295 | 2.3812 | 0.3483 | 0.5879 | 5.5266 | 0.1064 |
| <i>Nilaparvata lugens</i> (biotype 3, Zhejiang, China)         | 0.5891 | 4.5385 | 0.1298 | 0.8295 | 2.3812 | 0.3483 | 0.5875 | 5.5253 | 0.1063 |
| <i>Nilaparvata mui</i>                                         | 0.5864 | 4.4297 | 0.1324 | 0.9134 | 1.6130 | 0.5663 | 0.5734 | 5.5872 | 0.1026 |
| <i>Nilaparvata</i> sp.                                         | 0.5939 | 5.0614 | 0.1173 | 0.8029 | 2.0852 | 0.3850 | 0.6215 | 4.6709 | 0.1331 |
| <i>Peregrinus maidis</i>                                       | 0.6093 | 4.5926 | 0.1327 | 0.7978 | 2.9282 | 0.2725 | 0.6018 | 4.8365 | 0.1244 |
| <i>Sogatella furcifera</i> (Hainan, China)                     | 0.5736 | 5.1879 | 0.1106 | 0.8167 | 2.2186 | 0.3681 | 0.6144 | 4.2756 | 0.1437 |
| <i>Sogatella furcifera</i> (Yunnan, China)                     | 0.5699 | 5.2747 | 0.1080 | 0.8167 | 2.2186 | 0.3681 | 0.6145 | 4.2924 | 0.1432 |
| <i>Sogatella vibix</i>                                         | 0.6047 | 4.8459 | 0.1248 | 0.7745 | 2.2048 | 0.3513 | 0.5838 | 5.0983 | 0.1145 |
| <i>Laodelphax striatellus</i> (Jiangsu, China)                 | 0.5958 | 5.1282 | 0.1162 | 0.9814 | 1.1750 | 0.8352 | 0.6286 | 5.0679 | 0.1240 |
| <i>Laodelphax striatella</i> (Suwon, Korea)                    | 0.6007 | 5.0348 | 0.1193 | 0.9814 | 1.1750 | 0.8352 | 0.6247 | 5.0972 | 0.1225 |
| <i>Laodelphax striatella</i> (Milyang, Korea)                  | 0.6007 | 5.0348 | 0.1193 | 0.9814 | 1.1750 | 0.8352 | 0.6247 | 5.0972 | 0.1225 |
| <i>Laodelphax striatellus</i> A1 (China)                       | 0.5959 | 5.1194 | 0.1164 | 0.9483 | 1.5185 | 0.6245 | 0.6269 | 5.0740 | 0.1235 |
| <i>Laodelphax striatellus</i> B1 (China)                       | 0.6007 | 5.0348 | 0.1193 | 0.9814 | 1.1750 | 0.8352 | 0.6247 | 5.0972 | 0.1225 |
| <i>Laodelphax striatellus</i> (Beijing, China)                 | 0.6255 | 4.7742 | 0.1310 | 0.9602 | 1.3670 | 0.7025 | 0.6353 | 4.9438 | 0.1285 |

| Species                                                        | ND6    |        |        |
|----------------------------------------------------------------|--------|--------|--------|
|                                                                | Ka     | Ks     | Ka/Ks  |
| <b>Fulgoroidea</b>                                             |        |        |        |
| <b>Flatidae</b>                                                |        |        |        |
| Flatinae                                                       |        |        |        |
| <i>Metcalfa pruinosa</i> (H1)                                  | 0.8362 | 2.1858 | 0.3826 |
| <i>Metcalfa pruinosa</i> (H3)                                  | 0.8362 | 2.1858 | 0.3826 |
| <i>Salurnis marginella</i>                                     | 0.8073 | 2.4032 | 0.3359 |
| <i>Geisha distinctissima</i>                                   | 0.7782 | 2.6300 | 0.2959 |
| <b>Fulgoridae</b>                                              |        |        |        |
| Fulgorinae                                                     |        |        |        |
| <i>Pyrops candelaria</i>                                       | 0.7912 | 2.7288 | 0.2900 |
| Aphaeninae                                                     |        |        |        |
| <i>Lycorma delicatula</i> (Henan, China)                       | 0.8054 | 2.4521 | 0.3285 |
| <i>Lycorma delicatula</i> (China)                              | 0.8054 | 2.4521 | 0.3285 |
| <i>Lycorma delicatula</i> (Korea)                              | 0.8054 | 2.4521 | 0.3285 |
| <i>Aphaena</i> ( <i>Callidepsa</i> ) <i>amabilis</i>           | 0.7919 | 2.8620 | 0.2767 |
| <i>Aphaena</i> ( <i>Aphaena</i> ) <i>discolor nigrotibiata</i> | 0.8777 | 1.9291 | 0.4550 |
| <b>Achilidae</b>                                               |        |        |        |
| Achilinae                                                      |        |        |        |
| <i>Betatropis formosana</i>                                    | 0.8356 | 2.1523 | 0.3882 |
| <i>Magadhaideus luodiana</i> sp. nov                           | 0.7282 | 2.6059 | 0.2795 |
| <i>Peltatavertexalis horizontalis</i> sp. nov                  | 0.7640 | 2.5709 | 0.2972 |
| <i>Plectoderini</i> sp.                                        | 0.7867 | 2.4784 | 0.3174 |
| <i>Paracatonidia</i> sp.                                       | 0.8194 | 2.2793 | 0.3595 |
| <b>Cixiidae</b>                                                |        |        |        |
| Cixiinae                                                       |        |        |        |
| <i>Pentastiridius</i> sp.                                      | 0.8918 | 1.7634 | 0.5057 |
| <b>Derbidae</b>                                                |        |        |        |
| Otiocerinae                                                    |        |        |        |
| <i>Lydda</i> sp.                                               | 0.7701 | 3.1016 | 0.2483 |
| <b>Issidae</b>                                                 |        |        |        |
| Issinae                                                        |        |        |        |
| <i>Sivaloka damnosus</i>                                       | 0.7884 | 2.5912 | 0.3042 |
| <i>Sivaloka</i> sp.                                            | 0.7679 | 2.7103 | 0.2833 |
| <b>Ricaniidae</b>                                              |        |        |        |
| Ricaniinae                                                     |        |        |        |
| <i>Ricania marginalis</i>                                      | 0.7380 | 2.8633 | 0.2577 |
| <i>Ricania speculum</i>                                        | 0.7554 | 2.7924 | 0.2705 |
| <b>Delphacidae</b>                                             |        |        |        |
| Asiracinae                                                     |        |        |        |
| <i>Ugyops</i> sp.                                              | 0.8045 | 2.5844 | 0.3113 |
| Delphacinae                                                    |        |        |        |
| Saccharosydmini                                                |        |        |        |
| <i>Saccharosydne procerus</i>                                  | 0.8754 | 2.1813 | 0.4013 |
| Delphacini                                                     |        |        |        |
| <i>Changeondelphax velitchkovskyi</i>                          | 0.7774 | 2.3893 | 0.3254 |
| <i>Nilaparvata bakeri</i> (unknown)                            | 0.8356 | 2.1929 | 0.3810 |
| <i>Nilaparvata lugens</i> (biotype Y, Zhejiang, China)         | 0.8412 | 2.0618 | 0.4080 |
| <i>Nilaparvata lugens</i> (biotype L, Zhejiang, China)         | 0.8336 | 2.1123 | 0.3947 |
| <i>Nilaparvata lugens</i> (Hainan, China)                      | 0.8313 | 2.1426 | 0.3880 |
| <i>Nilaparvata lugens</i> (Hadong-gun, Korea)                  | 0.8313 | 2.1426 | 0.3880 |
| <i>Nilaparvata lugens</i> (Guangdong, China)                   | 0.8313 | 2.1426 | 0.3880 |
| <i>Nilaparvata lugens</i> (biotype 1, Zhejiang, China)         | 0.8313 | 2.1426 | 0.3880 |
| <i>Nilaparvata lugens</i> (biotype 2, Zhejiang, China)         | 0.8313 | 2.1426 | 0.3880 |
| <i>Nilaparvata lugens</i> (biotype 3, Zhejiang, China)         | 0.8313 | 2.1426 | 0.3880 |
| <i>Nilaparvata mui</i>                                         | 0.8261 | 2.1859 | 0.3779 |
| <i>Nilaparvata</i> sp.                                         | 0.8335 | 2.2157 | 0.3762 |
| <i>Peregrinus maidis</i>                                       | 0.8188 | 2.4191 | 0.3385 |
| <i>Sogatella furcifera</i> (Hainan, China)                     | 0.7844 | 2.5354 | 0.3094 |
| <i>Sogatella furcifera</i> (Yunnan, China)                     | 0.7844 | 2.5354 | 0.3094 |
| <i>Sogatella vibix</i>                                         | 0.7513 | 2.6016 | 0.2888 |
| <i>Laodelphax striatellus</i> (Jiangsu, China)                 | 0.8232 | 2.3496 | 0.3504 |
| <i>Laodelphax striatella</i> (Suwon, Korea)                    | 0.8199 | 2.4058 | 0.3408 |
| <i>Laodelphax striatella</i> (Milyang, Korea)                  | 0.8199 | 2.4058 | 0.3408 |
| <i>Laodelphax striatellus</i> A1 (China)                       | 0.8199 | 2.4058 | 0.3408 |
| <i>Laodelphax striatellus</i> B1 (China)                       | 0.8199 | 2.4058 | 0.3408 |
| <i>Laodelphax striatellus</i> (Beijing, China)                 | 0.8521 | 2.1230 | 0.4013 |

\*Stop codon was excluded in the count.
