# Supplementary material for: Complete Mitochondrial Genomes of Metcalfa pruinosa and Salurnis marginella (Hemiptera: Flatidae): Genomic Comparison and Phylogenetic Inference in Fulgoroidea
Source: MDPI journal article supplement (doi:10.3390/cimb43030099), 2021-09-30
Supplement: s1 [file s1]

**Table S11**

Node supports for monophyletic families and inter-familial relationships within Fulgoroidea.

| Relationships                                                       | Dataset (method) |      |     |      |
|---------------------------------------------------------------------|------------------|------|-----|------|
|                                                                     | 1                | 2    | 3   | 4    |
| <b>Monophyly</b>                                                    |                  |      |     |      |
| Ricaniidae (2)                                                      | 100              | 1    | 100 | 1    |
| Issidae (2)                                                         | 100              | 1    | 100 | 1    |
| Flatidae (4)                                                        | 100              | 1    | 100 | 1    |
| Fulgoridae (6)                                                      | 100              | 1    | 100 | 1    |
| Achilidae (5)                                                       | 97               | 1    | 100 | 1    |
| Derbidae (1)                                                        |                  |      |     |      |
| Delphacidae (24)                                                    | 72               | X    | 93  | 1    |
| Cixiidae (1)                                                        |                  |      |     |      |
| <b>Relationships among Families</b>                                 |                  |      |     |      |
| (Ric + Iss)                                                         | 72               | 1    | 58  | 0.99 |
| ((Ric + Iss) + Fla)                                                 | 100              | 1    | 100 | 1    |
| (((Ric + Iss) + Fla) + Ful)                                         | 42               | 0.94 |     |      |
| ((((Ric + Iss) + Fla) + Ful) + Ach)                                 | 99               | 1    |     |      |
| ((((((Ric + Iss) + Fla) + Ful) + Ach) + Der)                        | 100              | 1    |     |      |
| (((Ric + Iss) + Fla) + Der)                                         |                  |      | 50  | 0.66 |
| (((Ric + Iss) + Fla) + Der) + Ach)                                  |                  |      | 56  | 0.66 |
| ((((Ric + Iss) + Fla) + Der) + Ach) + Ful)                          |                  |      | 100 | 1    |
| (Del + Cix)                                                         | 100              |      | 98  | 1    |
| (Asi + Cix)                                                         |                  | 0.86 |     |      |
| ((Asi + Cix) + Del)                                                 |                  | 1    |     |      |
| ((((((Ric + Iss) + Fla) + Ful) + Ach) + Der) + (Del + Cix))         | 100              |      | 100 | 1    |
| ((((((Ric + Iss) + Fla) + Ful) + Ach) + Der) + ((Asi + Cix) + Del)) |                  | 1    |     |      |

1. Amino acid sequence-based analysis using the maximum-likelihood (ML) method; 2. Amino acid sequence-based analysis using the Bayesian inference (BI) method; 3. Nucleotide sequence-based analysis using the ML method; and 4. Nucleotide sequence-based analysis using the BI method. Family and subfamily names are abbreviated as follows: Ric, Ricaniidae; Iss, Issidae; Fla, Flatidae; Ful, Fulgoridae; Ach, Achilidae; Der, Derbidae; Del, Delphacidae; Cix, Cixidae; and Asi, subfamily Asiracinae in Delphacidae. Numbers next to family names within parentheses indicate taxon numbers included in the analyses. X, not supported for monophyly.
